# Supplementary material for: Catching the Main Ethiopian Rift Evolving Towards Plate Divergence
Source: Research Square preprint supplement (doi:10.21203/rs.3.rs-691934/v1), 2021-07-13
Supplement: Supplementary file 1 [file 04e74cf1f94ad965bf982e10.xlsx]

## Sheet: Whole rock
ESM 2 – Whole rock major and trace elements data for the entire sample dataset
	Eruptive Fissures																																			Monogenetic Scoria Cones
Sample	ME1	ME2	ME7A	ME7B	ME8	ME9A	ME9B	ME10B	ME11	ME12A	ME14A	ME14B	ME26	ME28	ME31	ME32	ME33	ME34	ME36	ME38	ME39A	ME39B	ME40	kb1	kb2	kone6	kb3	ged6	ged8a	ged8b	ged9	ged2a	ged5b		Sample	fk3	fk2	fk7b	fk11	fk13	fk14	fk16	fk10	fk5	fk1	fk23	ME19A	ME19B	ME20
Location	Metehara	Metehara	Metehara	Metehara	Metehara	Metehara	Metehara	Metehara	Metehara	Metehara	Metehara	Metehara	Metehara	Metehara	Metehara	Metehara	Metehara	Metehara	Metehara	Metehara	Metehara	Metehara	Metehara	Kone-Kokoro	Kone-Kokoro	Kone-Kokoro	Kone-Kokoro	Koka	Koka	Koka	Koka	Koka	Koka		Location	Fantale-Kone	Fantale-Kone	Fantale-Kone	Fantale-Kone	Fantale-Kone	Fantale-Kone	Fantale-Kone	Fantale-Kone	Fantale-Kone	Fantale-Kone	Fantale-Kone	Fantale-Kone	Fantale-Kone	Fantale-Kone
Sample	ME1	ME2	ME7A	ME7B	ME8	ME9A	ME9B	ME10B	ME11	ME12A	ME14A	ME14B	ME26	ME28	ME31	ME32	ME33	ME34	ME36	ME38	ME39A	ME39B	ME40	kb1	kb2	kone6	kb3	ged6	ged8a	ged8b	ged9	ged2a	ged5b		Sample	fk3	fk2	fk7b	fk11	fk13	fk14	fk16	fk10	fk5	fk1	fk23	ME19A	ME19B	ME20
SiO2 wt%	47.7869	48.808	48.7108	48.3303	48.9425	48.1052	48.5282	48.0387	48.7565	48.7134	48.7605	48.7317	48.851	48.3001	48.701	48.1693	47.8677	48.916	48.9934	48.4201	48.8419	48.7717	48.9689	49.3022	49.4014	49.0714	49.5479	51.412	52.3263	51.8297	51.4253	51.3273	51.2101		SiO2	49.5358	49.3336	47.0608	47.2189	49.1539	49.8967	48.0109	48.9411	50.3831	49.3357	48.2856	49.3521	48.5237	48.632
TiO2	4.25186	4.02116	4.15417	4.29672	3.85696	4.33404	4.1	4.33866	4.22844	4.20857	4.25404	4.21931	4.26076	4.03339	4.18595	4.26162	4.23724	4.18058	4.18078	4.21738	4.04667	4.02779	3.79471	3.67835	3.63945	3.75281	3.67021	3.48284	3.35668	3.5175	3.43821	3.37573	3.43872		TiO2	2.45531	2.02655	3.09144	2.26531	2.50479	1.8636	2.14682	2.1374	2.64161	2.76417	2.348	2.86596	2.72163	2.79351
Al2O3	13.4725	13.7638	13.4874	13.2714	14.0075	12.875	13.3473	12.8166	12.8606	12.9507	12.8214	13.3762	12.7271	13.8094	12.76	13.1886	13.2528	13.2783	12.6649	13.1709	13.4496	13.4804	13.997	13.3533	13.5756	13.4756	13.3952	14.8304	14.8277	14.5604	14.7718	15.1603	15.0006		Al2O3	15.5401	17.8862	16.2604	16.6597	15.8586	17.7466	16.0903	15.7994	15.0012	15.5242	14.3168	15.3798	15.6489	16.5246
FeOtot	14.8203	13.4577	14.1201	14.723	13.23	14.7502	14.0568	14.722	14.3792	14.0808	14.4237	14.4382	14.1975	13.9153	14.5287	14.6492	14.4631	14.4061	14.8377	14.3858	13.6864	13.9484	13.1193	12.3771	12.7121	13.3781	13.0647	12.0952	11.6567	12.225	12.1113	12.0176	12.251		FeOtot	11.0565	11.1315	12.995	12.243	11.8615	10.0886	11.2078	11.7274	11.7398	11.8168	11.92	13.1704	12.1706	12.5693
MnO	0.319199	0.303732	0.322404	0.335906	0.29544	0.326473	0.313886	0.325759	0.324542	0.31483	0.324954	0.326776	0.319174	0.300444	0.325041	0.321321	0.316841	0.320232	0.33055	0.322289	0.3029	0.308425	0.287631	0.197827	0.217126	0.233915	0.195952	0.27074	0.264089	0.273799	0.272824	0.264364	0.267684		MnO	0.204609	0.197156	0.237325	0.216591	0.211757	0.171807	0.196766	0.206812	0.204697	0.208616	0.216453	0.276641	0.261498	0.250871
MgO	4.37995	3.87081	4.06352	4.1978	3.63665	4.28341	4.03743	4.4702	4.29106	4.39137	4.78	4.68687	4.53083	3.87563	4.47557	4.24411	3.94612	3.81283	4.31053	4.27161	4.10665	3.89995	3.7059	6.35725	5.68664	5.03426	5.4203	3.35922	3.45049	3.51852	3.49608	3.29438	3.31517		MgO	6.12804	5.07417	5.81601	6.85244	5.94937	4.98239	7.19024	7.27979	6.39678	5.42402	8.17369	5.86185	6.5036	5.86052
CaO	9.76191	9.03122	9.27452	9.18282	8.99315	9.21667	9.12731	9.15825	9.04336	9.0925	9.77928	8.89796	9.05246	9.01834	9.24285	9.12469	9.40957	9.01505	9.41191	9.30545	8.92506	8.94331	8.99225	9.29375	9.42949	9.54374	9.45546	7.87803	7.75238	7.82881	7.97701	8.02243	8.08201		CaO	10.6499	10.3247	9.55621	10.9896	10.2854	11.3291	10.6243	10.5681	10.0302	10.1179	10.4413	9.10819	9.89692	9.31
Na2O	3.56387	4.55093	3.94198	3.79286	4.6844	4.13051	4.38004	4.25337	4.02913	4.23904	3.23421	3.37874	4.03878	4.58403	3.81924	4.09787	4.41932	4.01117	3.34669	3.97899	4.48852	4.45593	4.7454	4.10079	3.87726	3.77824	3.77389	4.89478	4.54865	4.46967	4.75273	4.76872	4.68448		Na2O	3.0896	2.85357	3.5464	2.68594	3.07552	3.09252	3.24457	2.49209	2.64059	3.24398	2.95819	2.62075	2.79649	2.80996
K2O	0.772689	0.911195	0.849786	0.842857	0.94622	0.885404	0.910884	0.884791	0.993455	0.924179	0.811363	0.87243	0.926831	0.897313	0.96679	0.892901	0.913491	0.910079	0.833067	0.8799	0.925695	0.951654	0.959779	0.875797	1.04531	0.867521	1.0824	1.179	1.18483	1.19736	1.1657	1.14897	1.17369		K2O	0.869588	0.809376	0.872609	0.569205	0.715942	0.576057	0.844023	0.630777	0.644795	1.12653	0.958578	0.783816	0.849099	0.797853
P2O5	0.870825	1.28153	1.07537	1.02627	1.40715	1.09307	1.1981	0.991665	1.09363	1.08464	0.858369	1.07178	1.09563	1.26609	0.994919	1.05047	1.17375	1.14974	1.0905	1.04769	1.2266	1.21239	1.42907	0.463657	0.415642	0.864469	0.393978	0.597672	0.632182	0.579269	0.589053	0.620239	0.576551		P2O5	0.470601	0.363182	0.563776	0.299251	0.38318	0.252657	0.444277	0.217153	0.31728	0.438094	0.38137	0.580527	0.627595	0.451363
											8.63
Sample		ME2			ME8		ME9B				ME14A		ME26	ME28	ME31		ME33	ME34	ME36	ME38	ME39A	ME39B	ME40	kb1	kb2	kone6	kb3	ged6	ged8a	ged8b	ged9	ged2a	ged5b		Sample	fk3		fk7b	fk11	fk13	fk14	fk16					ME19A	ME19B
Ba		479			474		487				516		484	477	482		495	557	484	486	486	499	487	398	363	487	407	347	349	348	356	338	337		Ba	419		516	274	362	177	296					486	477
Ce		69.4			72.5		70.9				76.9		68.4	68.2	70.6		69.1	73.5	75	68.1	69.3	75.4	77.2	56.9	62.9	65.1	52.4	75.5	75.2	73.7	73.8	72	71		Ce	52.4		63.5	42.4	43.2	30.2	44.5					71.7	72.9
Co		35.7			35.3		35.8				41.26		34.6	35.6	34.6		35.2	34.2	33.5	34.6	35.7	36.8	39.1	59.2	57.1	43.4	48.5	28.5	27.4	27.2	27.3	29.4	29.4		Co	48.5		50.9	56.8	53.2	44.1	54.2					36.6	36.2
Cr											50													660	350	20	130								Cr	220		30	50	80	90	340
Cs		0.2			0.3		0.2				0.2		0.2	0.3	0.3		0.1	0.2	0.4	0.2	0.4	0.2	0.3	0.2	0.3		0.2	0.3	0.3	0.5	0.3	0.2	0.2		Cs					0.3	0.1						0.2	0.2
Cu		8			7		8				11		8	9	10		7	7	10	9	6	5		79	77	21	58			6		5	7		Cu	47		42	64	64	70	71					9	9
Dy		7.8			8.09		8.08				7.65		7.95	7.84	8.28		7.94	8.67	8.26	7.81	8.01	8.67	8.84	4.5	4.65	7.4	5.01	7.18	7.49	7.23	6.97	6.94	7.01		Dy	4.86		6.08	4.49	4.72	3.95	4.69					7.99	8
Er		3.9			4.1		4.16				4.37		3.99	3.88	4.18		4.11	4.36	4.36	3.81	3.9	4.29	4.4	2.31	2.42	3.86	2.63	3.67	3.71	3.64	3.79	3.52	3.43		Er	2.52		3.2	2.47	2.35	2.21	2.42					4.03	3.98
Eu		3.9			3.99		3.86				3.69		3.81	3.78	3.76		3.83	3.94	3.76	3.85	3.79	4.07	4.2	1.99	2.02	3.34	2.01	3.09	3.12	2.99	3.04	2.95	2.92		Eu	2.19		2.75	1.84	2.09	1.43	1.9					3.93	3.87
Ga		22			23		23				22		22	23	23		22	23	22	22	23	23	26	17	19	22	21	25	24	24	24	24	24		Ga	20		22	21	21	21	19					23	23
Gd		9.93			10.4		10.2				8.86		10.1	9.9	10.1		10.2	10.7	10.4	10.1	9.86	10.9	11.7	5.82	5.93	9.74	5.93	8.99	8.8	8.84	8.74	8.19	8.33		Gd	6.09		7.35	5.19	5.42	4.35	5.45					10	10.4
Hf		4			4		4				6		4	4	4		4	4	4	4	4	5	4	4	4	4	4	5	6	6	5	5	5		Hf	3		4	3	3	3	3					4	4
Ho		1.49			1.61		1.54				1.59		1.54	1.52	1.55		1.56	1.72	1.61	1.51	1.63	1.73	1.74	0.86	0.97	1.45	0.99	1.37	1.41	1.44	1.43	1.36	1.34		Ho	0.98		1.17	0.91	0.96	0.81	0.89					1.56	1.57
La		31			33		31.9				38.5		30.8	30.6	31.8		30.9	34.5	33.9	30.5	31.3	34.8	34.7	30.2	31.6	31.1	25.1	34.9	35.1	34.4	33.9	33.4	32.6		La	25.1		30.5	20	19.8	13.8	20.9					32	32.7
Lu		0.48			0.52		0.51				0.58		0.49	0.47	0.52		0.47	0.58	0.53	0.47	0.49	0.53	0.56	0.28	0.32	0.47	0.35	0.49	0.47	0.5	0.48	0.44	0.46		Lu	0.33		0.39	0.33	0.32	0.29	0.33					0.51	0.51
Nb		32			34		32				33		32	33	34		33	35	34	32	33	37	37	35	34	32	33	39	40	39	38	38	36		Nb	28		34	24	22	17	24					33	34
Nd		44.3			45.5		45				42.3		43.3	43.5	44.9		44.1	47.3	45.5	43.8	44.5	47.5	50.1	31.2	30.9	40.9	27.7	42.4	41.4	42.5	41.4	40.4	39.2		Nd	29.5		36.7	23.3	25.5	17.8	24.7					44.9	45.4
Ni		12			15		12				10		12	13	15		13	13	18	11	13	13	13	167	137	23	61	12	12	10	10	11	10		Ni	74		43	67	66	45	121					12	15
Pb															6		6		9									18							Pb			6	7		14						6
Pr		9.43			9.92		9.62				9.99		9.39	9.37	9.58		9.38	10.2	9.85	9.26	9.55	10.4	10.5	6.98	7.64	9.2	6.62	9.69	9.77	9.55	9.58	9.3	9.1		Pr	6.72		8.33	5.38	5.6	4.02	5.74					9.91	9.89
Rb		16.8			17.5		17.3				17		18	17.3	20.6		17.2	17.3	19.9	17	17.4	18.1	19.2	18.2	20.9	17.4	19.9	25.8	26.5	25.9	25.2	24.3	24		Rb	11.1		12.6	9.5	8	10.5	13					16.1	18.8
Sc		28			27		28				21		27	28	27		28	28	26	27	28	28	27	28	25	33	29	18	18	18	18	19	19		Sc	26		23	26	25	26	27					28	28
Sm		10			10.3		9.7				9.1		9.7	9.8	9.8		9.5	10.5	9.9	9.6	9.8	10.5	10.9	5.7	6.2	8.9	5.8	9	9.1	8.9	8.9	8.5	8.6		Sm	6.1		7.3	5.1	5.6	4.2	5.3					10	9.9
Sr		480			449		487				483		470	479	462		482	477	446	475	477	476	480	402	550	425	463	555	539	548	558	557	544		Sr	490		495	419	512	424	427					478	464
Ta		1.9			2		2				2.3		2	1.9	2.1		1.9	2.2	2.1	2	2.1	2.2	2.3	1.9	2.2	1.8	1.8	2.4	2.4	2.4	2.4	2.3	2.3		Ta	1.6		1.9	1.3	1.3	0.9	1.3					2	2
Tb		1.42			1.44		1.42				1.33		1.39	1.39	1.44		1.41	1.54	1.53	1.42	1.47	1.55	1.62	0.88	0.86	1.36	0.9	1.33	1.32	1.29	1.24	1.26	1.22		Tb	0.87		1.04	0.82	0.8	0.68	0.83					1.49	1.45
Th		2.2			2.7		2.4				3.7		2.3	2.3	2.6		2.3	2.8	3	2.4	2.6	2.9	3.3	2.5	3.05	2.4	2.7	3.5	3.6	3.7	3.5	3.4	3.5		Th	2		2.1	1.8	1.5	1.3	1.7					2.3	2.5
Tm		0.49			0.54		0.54				0.63		0.53	0.54	0.55		0.58	0.58	0.56	0.51	0.52	0.59	0.62	0.32	0.33	0.5	0.37	0.51	0.51	0.53	0.49	0.5	0.46		Tm	0.34		0.4	0.33	0.32	0.31	0.32					0.52	0.54
U		0.61			0.69		0.61				0.87		0.68	0.63	0.72		0.6	0.68	0.86	0.6	0.66	0.67	0.74	0.72	0.81	0.74	0.73	0.92	0.96	0.94	0.94	0.89	0.9		U	0.34		0.51	0.52	0.29	0.36	0.3					0.62	0.71
V		312			285		303				306		301	312	292		309	305	271	301	295	298	302	262	264	360	322	202	193	195	199	209	215		V	278		290	281	305	273	274					301	299
Y		39.5			41.2		39.9				40.5		38.1	39.4	40.3		40.3	43.7	41.4	39.2	40.7	44.3	45.4	32	34.9	39.1	36.2	37.6	37.6	37	36.6	36.7	34.8		Y	25		31.3	24.4	24	21.3	23.3					39.7	39.9
Yb		3.2			3.3		3.3				3.8		3.2	3.2	3.4		3.2	3.6	3.5	3.2	3.3	3.4	3.5	2	2.1	3.2	2.3	3.1	3.2	3.3	3.1	3	2.9		Yb	2.2		2.6	2.1	2.1	1.9	2.1					3.1	3.2
Zn		129			132		129				137.7		129	116	139		133	138	130	132	127	129	130	84	88	121	100	123	123	130	125	121	119		Zn	92		113	89	99	87	89					134	129
Zr		136			150		140				132		137	138	148		141	160	158	137	143	158	160	141	144	147	139	194	199	197	190	190	183		Zr	124		150	116	108	95.9	114					138	146
[truncated: 58 more columns]
