# Supplementary material for: Catching the Main Ethiopian Rift Evolving Towards Plate Divergence
Source: Research Square preprint supplement (doi:10.21203/rs.3.rs-691934/v1), 2021-07-13
Supplement: Supplementary file 2 [file 82046696f17e028fe1846ea0.xlsx]

## Sheet: Ol
ESM 4 – Selected mineral chemistry compositions
sample	SiO2	TiO2	FeO	MnO	MgO	CaO	Na2O		Total	Fo
ME2-5	42.63	n.a.	14.01	n.a.	42.17	0.44	0.53		99.78	84.2362
ME2-6	41.27	n.a.	16.23	n.a.	41.49	0.4	0.36		99.75	81.944
ME2-7	40.37	n.a.	19.32	n.a.	39.45	0.35	0.39		99.88	78.3785
Kb1_ol1	41.04	n.a.	10.97	0.32	46.64	0.31	n.a.		99.28	88.3011
Kb1_ol2	41.38	n.a.	12.21	0	46.09	0.32	n.a.		100	87.0153
Kb1_ol3	40.8	n.a.	12.83	0	45.63	0.25	n.a.		99.51	86.3273
Kb1_ol4	40.89	n.a.	12.61	0.32	45.73	0.28	n.a.		99.83	86.5557
Kb1_ol5	40.94	n.a.	12.51	0.25	45.81	0.27	n.a.		99.78	86.6683
Kb1_ol6	40.85	n.a.	12.95	0.28	45.35	0.34	n.a.		99.77	86.1438
Kb2_ol2	41.07	n.a.	11.84	0.2	46.59	0.31	n.a.		100.01	87.4777
Kb2_ol3	40.9	n.a.	14.26	0.26	44.31	0.28	n.a.		100.01	84.654
Kb2_ol4	40.66	n.a.	14.99	0.33	43.74	0.29	n.a.		100.01	83.8193
Kb2_ol5	41	n.a.	13.15	0.25	45.37	0.23	n.a.		100	85.9651
Kb3_ol1	41.14	n.a.	13.24	0.31	45.06	0.25	n.a.		100	85.7993
Kb3_ol2	40.98	n.a.	14.16	0.33	44.2	0.33	n.a.		100	84.7131
Kb3_ol3	41.07	n.a.	13.75	0.37	44.54	0.28	n.a.		100.01	85.1867
Kb3_ol4	40.42	n.a.	16.12	0.34	42.8	0.31	n.a.		99.99	82.4978
Kb3_ol5	41.01	n.a.	14.75	0.29	43.5	0.3	n.a.		99.85	83.9631
Kb3_ol6	40.86	n.a.	14.5	0.41	44	0.24	n.a.		100.01	84.3435
Kone1_ol1	39.87	n.a.	19.61	0.42	39.64	0.46	n.a.		100	78.2069
Kone1_ol2	40.89	n.a.	15.48	0.23	43.16	0.25	n.a.		100.01	83.1925
Kone1_ol3	40.3	n.a.	16.23	0.39	42.74	0.34	n.a.		100	82.379
Kone1_ol4	40.64	n.a.	15.09	0.35	43.62	0.3	n.a.		100	83.6915
Kone1_ol5	40.85	n.a.	14.78	0.31	43.73	0.33	n.a.		100	84.0067
Ged13_ol1	40.01	n.a.	19.51	0.35	39.82	0.32	n.a.		100.01	78.3709
Ged13_ol2	39.91	n.a.	18.78	0.37	40.74	0.2	n.a.		100	79.3866
Ged13_ol3	39.75	n.a.	19.23	0.38	40.35	0.3	n.a.		100.01	78.8363
Ged13_ol4	39.79	n.a.	19.87	0.48	39.56	0.3	n.a.		100	77.9469
Ged13_ol5	40.03	n.a.	19.18	0.36	40.09	0.33	n.a.		99.99	78.7718
Ged_ol1	40.3	n.a.	15.4	0.39	43.6	0.32	n.a.		100.01	83.4057
Ged1_ol2	40.55	n.a.	14.52	0.35	44.26	0.31	n.a.		99.99	84.403
FK14_14	38.297	0	17.954	0.274	42.61	0.207	0.011		99.353	80.8183
FK14_15	38.24	0.006	17.5	0.272	42.68	0.224	0.02		98.942	81.2372
FK14_22n	38.175	0.082	16.235	0.241	43.389	0.22	0.034		98.376	82.5923
FK14_22b	38.501	0.027	18.537	0.279	41.841	0.259	0		99.444	80.0285
FK14_21n	37.831	0.041	20.076	0.267	40.532	0.199	0.064		99.01	78.1859
FK14_21b	37.665	0	18.597	0.291	41.742	0.178	0		98.473	79.9388
FK14_18	38.021	0.042	18.467	0.278	41.977	0.213	0		98.998	80.1406
FK14_27	38.154	0	18.241	0.286	41.749	0.184	0.008		98.622	80.2497
FK2_09	38.288	0	15.061	0.201	44.066	0.217	0.048		97.881	83.8559
FK2_08	38.772	0.031	15.583	0.258	44.64	0.182	0.027		99.493	83.5678
FK2_07	38.824	0	15.626	0.233	44.284	0.175	0		99.142	83.4195
FK2_05	38.717	0.115	16.52	0.269	43.754	0.196	0.027		99.598	82.4622
FK2_21	38.819	0.101	16.599	0.234	43.509	0.225	0.026		99.513	82.3115
FK2_16	38.558	0.075	15.428	0.226	44.605	0.174	0.012		99.078	83.6939
FK2_17	38.602	0.03	15.675	0.308	44.219	0.228	0.018		99.08	83.3558
FK2_ol1	41.11	n.a.	14.01	0.3	44.34	0.23	n.a.		99.99	84.8911
FK2_ol2	41.06	n.a.	14.35	0.24	44.1	0.26	n.a.		100.01	84.51
FK2_ol3	40.71	n.a.	15.1	0.27	43.63	0.3	n.a.		100.01	83.6856
FK2_ol4	40.7	n.a.	14.77	0.3	43.97	0.26	n.a.		100	84.0892
FK2_ol5	40.33	n.a.	15.72	0.36	43.28	0.3	n.a.		99.99	83.0155
FK1_ol2	40.33	n.a.	16.85	0.33	42.17	0.32	n.a.		100	81.6277
FK1_ol3	39.98	n.a.	18.52	0.41	40.75	0.35	n.a.		100.01	79.6178
FK1_ol4	39.77	n.a.	19.15	0.46	40.22	0.39	n.a.		99.99	78.852
FK1_ol5	39.96	n.a.	18.68	0.43	40.64	0.29	n.a.		100	79.4337
FK3_ol1	40.51	n.a.	15.24	0.34	43.6	0.31	n.a.		100	83.5498
FK3_ol2	40.55	n.a.	14.79	0.3	44.06	0.3	n.a.		100	84.0984
FK3_ol3	40.64	n.a.	15.65	0.36	43	0.34	n.a.		99.99	82.9869
FK3_ol4	40.46	n.a.	14.61	0.26	44.35	0.32	n.a.		100	84.3483
FK3_ol5	40.54	n.a.	15.06	0.38	43.72	0.3	n.a.		100	83.7498
FK5_ol1	40.76	n.a.	14.9	0.29	43.78	0.27	n.a.		100	83.9132
FK5_ol2	40.46	n.a.	16.32	0.29	42.63	0.31	n.a.		100.01	82.2611
FK5_ol3	40.51	n.a.	16.31	0.36	42.5	0.32	n.a.		100	82.2254
FK5_ol4	40.17	n.a.	16.11	0.35	43.06	0.31	n.a.		100	82.594
FK5_ol5	39.06	n.a.	18.31	0.44	39.28	0.35	n.a.		97.44	79.2035
FK10_ol1	40.94	n.a.	14.39	0.26	44.07	0.33	n.a.		99.99	84.4646
FK10_ol3	40.86	n.a.	14.67	0.22	43.98	0.27	n.a.		100	84.1829
FK10_ol4	40.96	n.a.	14.27	0.26	44.26	0.25	n.a.		100	84.6302
FK10_ol5	40.64	n.a.	14.58	0.33	44.18	0.27	n.a.		100	84.3247
FK13_ol2	40.05	n.a.	16.94	0.09	42.6	0.32	n.a.		100	81.6999
FK13_ol3	40.03	n.a.	18.74	0.44	40.48	0.31	n.a.		100	79.3166
FK13_ol4	39.72	n.a.	18.78	0.43	40.73	0.33	n.a.		99.99	79.3825
FK14_ol_idd1_n	39.88	n.a.	20.19	0	39.53	0.4	n.a.		100	77.6579
FK14_ol_idd2_n	40.06	n.a.	16.5	0.42	42.76	0.26	n.a.		100	82.1451
FK16_ol1	40.97	n.a.	13.88	0	44.71	0.44	n.a.		100	85.1158
FK16_ol2	40.62	n.a.	13.15	0	45.88	0.36	n.a.		100.01	86.0995
FK16_ol4	40.27	n.a.	14.25	0.43	44.66	0.39	n.a.		100	84.765
FK16_ol5	39.84	n.a.	14.51	0.56	44.68	0.4	n.a.		99.99	84.5359
FK20_ol1	43.2	n.a.	4.98	0	51.5	0.32	n.a.		100	94.8344
FK20_ol2	43.55	n.a.	5.76	0	48.71	0.31	n.a.		98.33	93.7551
FK20_ol4	42.59	n.a.	10.43	0	45.92	0.35	n.a.		99.29	88.6571
FK20_ol5	43.7	n.a.	6.46	0	49.57	0.26	n.a.		99.99	93.1612
FK20_ol6	41.07	n.a.	14.94	0.31	40.93	0.32	n.a.		97.57	82.9458
FK21_ol1	40.96	n.a.	13.69	0.16	44.87	0.31	n.a.		99.99	85.3344
FK21_ol2	40.39	n.a.	16.94	0.28	42.88	0.4	n.a.		100.89	81.7976
FK21_ol3	40.67	n.a.	15.15	0.34	43.5	0.34	n.a.		100	83.5995
FK21_ol4	41.08	n.a.	13.21	0.18	45.28	0.25	n.a.		100	85.8861
FK21_ol6	40.99	n.a.	12.26	0.35	46.08	0.32	n.a.		100	86.9666
FK23_ol1	41.69	n.a.	11.3	0.29	46.4	0.33	n.a.		100.01	87.9369
FK23_ol2	41.16	n.a.	11.75	0.28	46.52	0.29	n.a.		100	87.5446
FK23_ol5	40.67	n.a.	12.92	0.34	45.8	0.27	n.a.		100	86.2887
FK23_ol6	40.56	n.a.	16.13	0.52	42.46	0.33	n.a.		100	82.3733
FK16_ol3	40.13	n.a.	16.3	0.6	42.48	0.05	n.a.		99.56	82.2275

## Sheet: Cpx
sample	SiO2	TiO2	Al2O3	FeO	MnO	MgO	CaO	Na2O	En	Fe	Wo
ME2-1	53.48	1.69	2.87	8.44	0	14.75	17.99	0.77	35.8184	20.4954	43.6863
ME2-2	52.46	1.92	3.35	9.1	0	14.54	17.97	0.66	34.9435	21.8697	43.1867
ME2-3	51.81	2.04	3.18	9.68	0	13.99	18.61	0.68	33.0889	22.895	44.0161
ME2-4	52.58	1.63	3	9.26	0	14.24	18.58	0.73	33.8403	22.0057	44.154
ME2-5	50.45	2.28	4.8	9.29	0	14.59	17.99	0.61	34.846	22.1877	42.9663
ME2-6	48.88	2.96	6.42	9.09	0	12.84	18.92	0.88	31.4321	22.2521	46.3158
ME39a-1	50.33	2.63	4.45	9.61	0.55	14.01	17.78	0.64	33.8406	23.2126	42.9469
ME39a-2	51.77	1.88	3.39	9.5	0.36	13.65	18.78	0.67	32.5543	22.6568	44.7889
ME39a-3	52.78	1.65	2.2	9.72	0.39	14.34	18.37	0.55	33.7968	22.9083	43.2948
ME39a-4	52.24	1.77	2.89	11.03	0.43	14.61	16.36	0.67	34.7857	26.2619	38.9524
ME39a-6	53.7	1.27	1.84	9.35	0	15.27	18.06	0.51	35.7779	21.9072	42.3149
ME39a-7	51.11	2.5	3	11.43	0	13.58	17.67	0.71	31.8182	26.7807	41.4011
ME39a-8	52.81	1.25	3.09	7.28	0	16.01	19.01	0.55	37.8487	17.2104	44.9409
ME39a-9	52.39	1.28	3.44	7.6	0	15.53	19.08	0.67	36.7922	18.0052	45.2026
ME39a-10	52.27	1.47	3.84	8.61	0.32	14.96	18.53	n.a.	35.5344	20.4513	44.0143
GED5B-1	49.41	2.59	5.56	9.5	0	13.43	18.83	0.68	32.16	22.749	45.091
GED5B-2	50.68	1.93	4.31	9.21	0.46	14.43	18.49	0.5	34.2511	21.8609	43.888
GED5B-3	52.37	1.99	5.56	7.2	0	15.36	16.86	0.67	38.965	18.2648	42.7702
GED5B-4	54.31	1.16	2.78	9.4	0.35	16.31	14.53	0.79	40.5318	23.3598	36.1083
GED5B-5	51.86	2.75	4.61	10.81	0	14.33	14.64	1	36.0231	27.1745	36.8024
GED5B-6	55.52	1.28	3.91	9.49	0	14.08	14.44	1.28	37.0429	24.9671	37.99
GED2A-2	50.31	2.27	4.46	10.13	0	12.61	19.51	0.71	29.8462	23.9763	46.1775
GED2A-3	50.51	2.01	3.78	9.8	0	13.35	19.87	0.77	31.0321	22.7801	46.1878
GED2A-4	52.2	2.46	0	11.24	0	13.75	20.35	0	30.3264	24.7905	44.8831
FK14_26	48.703	1.629	5.5	8.193	0.189	13.737	20.187	0.42	32.6163	19.453	47.9308
FK2_112	51.469	1.264	2.121	9.88	0.247	14.205	20.021	0.313	32.2065	22.4006	45.3929
FK2_109	48.33	2.487	5.073	8.704	0.172	12.522	20.731	0.377	29.8448	20.745	49.4101
FK2_121	49.041	2.15	4.237	10.236	0.159	12.411	20.518	0.408	28.7525	23.7137	47.5339
FK2_116	47.967	2.724	4.291	11.694	0.288	11.325	20.365	0.506	26.1041	26.9546	46.9413

## Sheet: OPX
sample	SiO2	TiO2	Al2O3	FeO	MnO	MgO	CaO	Na2O	P2O5
ME39a-1	37.25	0.45	n.a.	39.26	1.05	20.98	0.65	0.36	n.a.
ME39a-2	37.43	0.29	n.a.	34.87	0.69	25.66	0.67	0.39	n.a.
ME2-1	38.8	0.35	0.26	29.1	0.88	29.09	0.57	0.37	0.58
ME2-2	36.35	0.37	n.a.	46.19	1.36	14.36	0.91	n.a.	0.46

## Sheet: Ox
sample	SiO2	TiO2	Al2O3	FeO	MnO	MgO	CaO	P2O5
ME1-1	0.62	22.68	4.48	63.79	0.58	6.34	n.a.	n.a.
ME2-1	1.12	24.34	1.59	69.59	1.18	1.38	0.51	0.3
ME1-2	0.76	25.88	1.2	68.91	1.01	1.64	0.3	0.3
ME2-2	0.37	24.83	0.89	71.73	1	1.19	n.a.	n.a.
ME1-3	0.52	48.91	1.1	46.25	1.2	2.02	n.a.	n.a.
ME2-3	0.84	23.78	2.62	68.69	1.17	2.55	n.a.	0.36
ME1-4	1.18	24.58	2.88	67.6	0.85	2.66	n.a.	0.26
ME39a-1	1.2	18.48	5.76	68.15	n.a.	6.52	n.a.	n.a.
GED5b-1	0.45	20.99	3.01	71.35	0.86	3.35	n.a.	n.a.
GED5b-2	0.81	21.47	2.59	70.49	0.97	3.31	0.35	n.a.
GED5b-3	0.97	22.25	2.1	70.88	1.13	2.16	0.5	n.a.
