# Supplementary material for: Catching the Main Ethiopian Rift Evolving Towards Plate Divergence
Source: Research Square preprint supplement (doi:10.21203/rs.3.rs-691934/v1), 2021-07-13
Supplement: Supplementary file 3 [file 8a0cb9ee074fb7900ac600fd.xlsx]

## Sheet: FK2-Pl1
ESM 3 – Plagioclase core-to-rim profiles by means of SEM-EDS/WDS
Dist from core	SiO2	TiO2	Al2O3	FeO	MgO	CaO	Na2O	K2O	Total		Si	Al	Fe3	Mn3	Ti	Mg	su1	Ca	Na	K	su2	ANORTHITE	HIGH ALBITE	POTASSIUM FELDSPAR		FeO
0	53.52	0.32	26.2	0.61	2.89	13.04	3.01	0.31	99.9		2.431	1.4026	0.0232	0.0038	0.0109	0.1957	4.0672	0.6346	0.2651	0.018	0.9176	0.6916	0.2889	0.0196		0.61
9	50.18	0.18	31.01	0.61	0.31	14.12	3.01	0.27	99.69		2.2936	1.6705	0.0233	0.0039	0.0062	0.0211	4.0186	0.6915	0.2667	0.0157	0.974	0.71	0.2739	0.0162		0.61
18	49.85	0.11	31.71	0.57	0.27	14.17	2.71	0.17	99.56		2.2769	1.707	0.0218	0.0058	0.0038	0.0184	4.0336	0.6934	0.24	0.0099	0.9433	0.7351	0.2544	0.0105		0.57
27	49.69	0.21	31.93	0.51	0.36	13.92	2.95	0.27	99.84		2.2653	1.7156	0.0194	0.0066	0.0072	0.0245	4.0386	0.6799	0.2608	0.0157	0.9564	0.7109	0.2726	0.0164		0.51
36	50.6	0.2	31.66	0.63	0.37	13.08	3.06	0.25	99.85		2.2981	1.6947	0.0239	0.0058	0.0068	0.025	4.0544	0.6365	0.2695	0.0145	0.9204	0.6915	0.2928	0.0157		0.63
45	34.2	0.26	49.01	0.97	0.46	12.51	1.67	0.62	99.7		1.5804	2.6692	0.0375	0.0114	0.009	0.0317	4.3391	0.6194	0.1496	0.0365	0.8055	0.7689	0.1857	0.0454		0.97
54	47.91	0.24	33.09	0.73	0.34	14.57	2.4	0.35	99.63		2.1959	1.7875	0.028	0.0085	0.0083	0.0232	4.0514	0.7155	0.2133	0.0205	0.9492	0.7538	0.2247	0.0216		0.73
63	51.73	0.23	30.13	0.63	0.48	12.65	3.79	0.25	99.89		2.35	1.6132	0.0239	0.0042	0.0079	0.0325	4.0317	0.6157	0.3338	0.0145	0.964	0.6387	0.3463	0.015		0.63
72	50.79	0.31	30.43	0.73	0.4	12.84	3.65	0.36	99.51		2.3185	1.6372	0.0279	0.0112	0.0106	0.0272	4.0327	0.628	0.3231	0.021	0.972	0.6461	0.3324	0.0216		0.73
81	51.65	0.24	30.3	0.7	0.33	12.34	3.8	0.26	99.62		2.3496	1.6245	0.0266	0.0058	0.0082	0.0224	4.0371	0.6014	0.3352	0.0151	0.9517	0.632	0.3522	0.0159		0.7
90	50.99	0.22	30.78	0.73	0.3	12.97	3.32	0.38	99.69		2.3229	1.6526	0.0278	0.005	0.0075	0.0204	4.0362	0.633	0.2932	0.0221	0.9484	0.6675	0.3092	0.0233		0.73
99	51.43	0.27	30.72	0.6	0.39	12.52	3.58	0.28	99.79		2.3368	1.645	0.0228	0.0031	0.0092	0.0264	4.0433	0.6095	0.3154	0.0162	0.9411	0.6476	0.3351	0.0172		0.6
108	50.77	0.2	31.81	0.65	0.24	12.26	3.46	0.33	99.72		2.3064	1.7031	0.0247	0.0046	0.0068	0.0163	4.0619	0.5967	0.3048	0.0191	0.9206	0.6482	0.331	0.0208		0.65
117	51.29	0.16	30.61	0.56	0.42	12.95	3.57	0.17	99.73		2.3332	1.6411	0.0213	0.0046	0.0055	0.0285	4.0342	0.6312	0.3149	0.0099	0.9559	0.6603	0.3294	0.0103		0.56
126	50.98	0.18	30.93	0.71	0.29	12.96	3.48	0.24	99.77		2.3199	1.6589	0.027	0.0046	0.0062	0.0197	4.0363	0.6319	0.307	0.0139	0.9529	0.6631	0.3222	0.0146		0.71
135	50.83	0.15	31.3	0.59	0.38	12.88	3.31	0.28	99.72		2.3117	1.6777	0.0224	0.0058	0.0051	0.0258	4.0485	0.6276	0.2919	0.0162	0.9357	0.6707	0.3119	0.0174		0.59
144	51.15	0.29	30.68	0.73	0.41	12.71	3.5	0.26	99.73		2.3274	1.6453	0.0278	0.0042	0.0099	0.0278	4.0424	0.6196	0.3088	0.0151	0.9435	0.6567	0.3273	0.016		0.73
153	51.33	0.3	30.1	0.61	0.35	12.79	3.69	0.36	99.53		2.343	1.6193	0.0233	0.0043	0.0103	0.0238	4.024	0.6255	0.3266	0.021	0.973	0.6428	0.3356	0.0215		0.61
162	50.82	0.29	30.55	0.76	0.46	13.29	3.39	0.25	99.81		2.3161	1.6409	0.029	0.0039	0.0099	0.0312	4.0311	0.6489	0.2996	0.0145	0.963	0.6739	0.3111	0.0151		0.76
171	51.22	0.16	30.46	0.68	0.28	13.2	3.49	0.29	99.78		2.3325	1.6348	0.0259	0.005	0.0055	0.019	4.0227	0.644	0.3081	0.0168	0.969	0.6646	0.318	0.0174		0.68
180	47.93	0.22	34.21	0.83	0.32	12.43	3.37	0.35	99.66		2.1873	1.84	0.0317	0.0093	0.0076	0.0218	4.0976	0.6078	0.2982	0.0204	0.9263	0.6561	0.3219	0.022		0.83
189	51.64	0.15	30.36	0.6	0.33	12.93	3.53	0.33	99.87		2.3463	1.6257	0.0228	0.005	0.0051	0.0223	4.0273	0.6294	0.311	0.0191	0.9595	0.656	0.3241	0.0199		0.6
198	51.14	0.21	30.35	0.76	0.35	13.04	3.44	0.27	99.56		2.3321	1.6312	0.029	0.007	0.0072	0.0238	4.0301	0.6371	0.3041	0.0157	0.957	0.6658	0.3178	0.0164		0.76
207	50.41	0.32	30.51	0.99	0.37	13.03	3.53	0.34	99.5		2.3053	1.6444	0.0379	0.0093	0.011	0.0252	4.0331	0.6384	0.313	0.0198	0.9713	0.6573	0.3223	0.0204		0.99
216	50.97	0.18	30.66	0.57	0.41	13.12	3.34	0.34	99.59		2.3257	1.6488	0.0218	0.0023	0.0062	0.0279	4.0326	0.6414	0.2955	0.0198	0.9567	0.6704	0.3089	0.0207		0.57
225	51.25	0.21	30.62	0.62	0.36	13.15	3.35	0.24	99.8		2.3312	1.6415	0.0236	0.0039	0.0072	0.0244	4.0317	0.6409	0.2954	0.0139	0.9502	0.6744	0.3109	0.0147		0.62
234	51.16	0.09	30.87	0.43	0.33	13.23	3.39	0.29	99.79		2.3293	1.6565	0.0164	0	0.0031	0.0224	4.0277	0.6454	0.2993	0.0168	0.9615	0.6712	0.3112	0.0175		0.43
243	50.86	0.24	30.97	0.67	0.29	13.19	3.21	0.24	99.67		2.3162	1.6623	0.0255	0.005	0.0082	0.0197	4.0369	0.6436	0.2834	0.0139	0.941	0.684	0.3012	0.0148		0.67
252	50.73	0.23	30.99	0.68	0.31	13.25	3.31	0.24	99.74		2.3094	1.6627	0.0259	0.0081	0.0079	0.021	4.035	0.6463	0.2922	0.0139	0.9524	0.6786	0.3068	0.0146		0.68
261	51.08	0.16	30.82	0.62	0.47	12.85	3.42	0.27	99.69		2.3243	1.6529	0.0236	0.0058	0.0055	0.0319	4.0439	0.6265	0.3017	0.0157	0.9439	0.6637	0.3197	0.0166		0.62
270	50.96	0.27	30.95	0.81	0.25	12.84	3.22	0.28	99.58		2.3201	1.6607	0.0308	0.0069	0.0092	0.017	4.0448	0.6263	0.2842	0.0163	0.9268	0.6758	0.3067	0.0175		0.81
279	51.19	0.15	30.69	0.68	0.38	12.93	3.48	0.27	99.77		2.3284	1.6452	0.0259	0.0062	0.0051	0.0258	4.0365	0.6301	0.3069	0.0157	0.9527	0.6614	0.3221	0.0164		0.68
288	51.16	0.25	30.43	0.69	0.28	13.11	3.38	0.27	99.57		2.3321	1.6348	0.0263	0.0069	0.0086	0.019	4.0278	0.6403	0.2987	0.0157	0.9547	0.6707	0.3129	0.0164		0.69
297	48.03	0.24	34.55	0.77	0.39	12.55	2.91	0.34	99.78		2.1871	1.8542	0.0293	0.0046	0.0082	0.0265	4.11	0.6123	0.2569	0.0198	0.889	0.6888	0.289	0.0222		0.77
306	51.41	0.27	30.38	0.66	0.28	12.64	3.71	0.29	99.64		2.3406	1.6301	0.0251	0.0066	0.0092	0.019	4.0306	0.6166	0.3275	0.0168	0.9609	0.6417	0.3408	0.0175		0.66
315	51.49	0.24	30.47	0.7	0.34	12.66	3.47	0.33	99.7		2.3422	1.6335	0.0266	0.0042	0.0082	0.0231	4.0378	0.617	0.306	0.0192	0.9422	0.6549	0.3248	0.0203		0.7
324	52.62	0.37	29.55	0.63	0.44	12.03	3.84	0.23	99.71		2.3885	1.5809	0.0239	0	0.0126	0.0298	4.0357	0.5851	0.338	0.0133	0.9363	0.6248	0.3609	0.0142		0.63
333	52.56	0.24	29.78	0.74	0.31	11.24	4.36	0.35	99.58		2.3848	1.5925	0.0281	0.0092	0.0082	0.021	4.0438	0.5464	0.3836	0.0203	0.9502	0.575	0.4036	0.0213		0.74
342	53.11	0.23	29.18	0.73	0.34	11.58	4.31	0.35	99.83		2.4071	1.5587	0.0277	0.0038	0.0078	0.023	4.0281	0.5623	0.3787	0.0202	0.9613	0.585	0.394	0.0211		0.73

## Sheet: FK3-Pl1
Dist from Core	SiO2	TiO2	Al2O3	MnO	MgO	CaO	Na2O	K2O		Total		Si	Al	Fe3	Mn3	Ti	Mg	su1	Ca	Na	K	su2	Compositions	ANORTHITE	HIGH ALBITE	POTASSIUM FELDSPAR	end				FeO
0	50.63	0.17	30.86	0.11	0.25	13.94	2.94	0.26		99.16		2.30955	1.65909	0.0255594	0.00425009	0.00583162	0.0169987	4.02129	0.681303	0.260024	0.0151304	0.956457		0.712319	0.271862	0.0158193	#1-		FELDSPAR		0.67
10.6	50.65	0.19	30.95	0.17	0.38	13.61	3	0.25		99.2		2.30787	1.66206	0.0255306	0.00656093	0.00651037	0.025809	4.03434	0.664426	0.265032	0.0145321	0.943991		0.703848	0.280757	0.0153944	#2-		FELDSPAR		0.67
21.2	50.65	0.25	30.74	0.23	0.31	13.44	3.28	0.26		99.16		2.30919	1.65173	0.0289767	0.00888164	0.00857118	0.0210667	4.02842	0.656503	0.289935	0.0151221	0.96156		0.682748	0.301526	0.0157266	#3-		FELDSPAR		0.76
31.8	50.24	0.09	31.12	0.09	0.38	13.86	3.2	0.25		99.23		2.2952	1.67558	0.0210131	0.00348257	0.00309196	0.0258768	4.02425	0.67841	0.283444	0.0145703	0.976424		0.69479	0.290288	0.0149221	#4-		FELDSPAR		0.55
42.4	50.92	0.23	30.42	0.18	0.37	13.4	3.38	0.32		99.22		2.32266	1.63536	0.0244137	0.00695434	0.00788944	0.0251568	4.02243	0.654878	0.298924	0.0186211	0.972423		0.673449	0.307402	0.0191492	#5-		FELDSPAR		0.64
53	50.69	0.27	30.7	0.17	0.39	13.39	3.23	0.31		99.15		2.31201	1.65029	0.0263192	0.00656752	0.00926086	0.0265147	4.03096	0.654342	0.285638	0.0180379	0.958019		0.683016	0.298155	0.0188284	#6-		FELDSPAR		0.69
63.6	50.25	0.27	31.14	0.18	0.34	13.83	2.85	0.33		99.19		2.29437	1.67572	0.0221469	0.00696123	0.0092707	0.02314	4.03162	0.676562	0.252301	0.0192221	0.948086		0.713609	0.266117	0.0202746	#7-		FELDSPAR		0.58
74.2	50.04	0.22	31.22	0.15	0.28	14.1	2.96	0.26		99.23		2.28337	1.67899	0.0293837	0.00579745	0.00754924	0.0190447	4.02414	0.689345	0.261878	0.0151353	0.966358		0.713343	0.270994	0.0156622	#8-		FELDSPAR		0.77
84.8	49.72	0.19	30.94	0.17	0.42	14.18	3.02	0.27		98.91		2.27879	1.67128	0.03028	0.00659945	0.00654858	0.0286931	4.02219	0.696317	0.268366	0.0157868	0.980469		0.710187	0.273711	0.0161013	#9-		FELDSPAR		0.79
95.4	50.34	0.19	31.09	0.06	0.39	13.98	2.97	0.26		99.28		2.297	1.67195	0.021751	0.00231891	0.00651961	0.0265258	4.02607	0.683459	0.262755	0.0151349	0.961349		0.710938	0.273319	0.0157434	#10-		FELDSPAR		0.57
106	49.87	0.2	31.49	0.3	0.38	13.64	3.05	0.21		99.14		2.27371	1.69209	0.0335532	0.0115852	0.00685718	0.0258246	4.04361	0.666295	0.269613	0.0122144	0.948123		0.702752	0.284365	0.0128827	#11-		FELDSPAR		0.88
116.6	50.29	0.22	31.09	0.14	0.38	13.84	3.01	0.26		99.23		2.29411	1.67151	0.0255602	0.00540938	0.00754704	0.0258388	4.02998	0.676437	0.266224	0.0151309	0.957791		0.706246	0.277956	0.0157977	#12-		FELDSPAR		0.67
127.2	50.37	0.28	30.91	0.13	0.39	13.59	3.17	0.3		99.14		2.29977	1.66329	0.0255825	0.00502738	0.00961372	0.026542	4.02982	0.664798	0.28062	0.017474	0.962892		0.690418	0.291435	0.0181474	#13-		FELDSPAR		0.67
137.8	50.24	0.29	30.83	0.2	0.37	13.52	3.25	0.34		99.04		2.29759	1.6617	0.0260069	0.0077471	0.00997338	0.0252221	4.02824	0.662457	0.288173	0.0198363	0.970467		0.682617	0.296943	0.02044	#14-		FELDSPAR		0.68
148.4	50.12	0.31	30.88	0.17	0.29	13.61	3.29	0.35		99.02		2.29144	1.66391	0.0317345	0.00658312	0.0106581	0.0197629	4.02409	0.666673	0.291635	0.0204138	0.978722		0.681167	0.297975	0.0208576	#15-		FELDSPAR		0.83
159	50.29	0.19	31.12	0.14	0.39	13.55	3.18	0.31		99.17		2.29514	1.67388	0.0259533	0.0054118	0.00652083	0.0265307	4.03344	0.66256	0.281386	0.0180488	0.961995		0.688736	0.292503	0.0187619	#16-		FELDSPAR		0.68
169.6	50.65	0.11	30.89	0.15	0.34	13.59	3.12	0.24		99.09		2.3103	1.66059	0.026702	0.00579517	0.00377314	0.0231166	4.03028	0.664151	0.275925	0.0139656	0.954041		0.696145	0.289217	0.0146384	#17-		FELDSPAR		0.7
180.2	50.5	0.28	30.9	0.2	0.25	13.86	2.99	0.3		99.28		2.30473	1.66204	0.02061	0.00773115	0.00960964	0.0170069	4.02173	0.677718	0.264574	0.0174666	0.959759		0.706134	0.275667	0.0181989	#18-		FELDSPAR		0.54
190.8	50.47	0.24	31.1	0.15	0.36	13.24	3.2	0.29		99.05		2.30116	1.6712	0.0297415	0.00579282	0.00822896	0.0244665	4.04059	0.646783	0.282885	0.0168682	0.946536		0.683316	0.298863	0.017821	#19-		FELDSPAR		0.78
201.4	50.6	0.26	30.77	0.14	0.44	13.48	3.21	0.26		99.16		2.3076	1.65384	0.0266971	0.00540784	0.00891671	0.0299102	4.03237	0.658655	0.283833	0.0151266	0.957614		0.687808	0.296396	0.0157962	#20-		FELDSPAR		0.7
212	50.64	0.2	30.99	0.2	0.25	13.57	3.22	0.22		99.29		2.30594	1.66315	0.0270377	0.00771384	0.00684866	0.0169688	4.02767	0.662053	0.284288	0.0127802	0.959121		0.690271	0.296404	0.0133249	#21-		FELDSPAR		0.71
222.6	50.51	0.27	30.7	0.15	0.45	13.55	3.24	0.27		99.14		2.3063	1.65209	0.0248204	0.00580117	0.00927093	0.0306272	4.02891	0.662881	0.286834	0.0157276	0.965443		0.686609	0.297101	0.0162905	#22-		FELDSPAR		0.65
233.2	50.62	0.27	30.92	0.16	0.27	13.47	3.13	0.29		99.13		2.30838	1.6618	0.0263141	0.00618002	0.0092591	0.0183529	4.03028	0.658127	0.276742	0.016871	0.95174		0.691498	0.290775	0.0177265	#23-		FELDSPAR		0.69
243.8	50.44	0.27	30.78	0.19	0.4	13.41	3.33	0.3		99.12		2.30298	1.6563	0.02711	0.00734776	0.00927044	0.0272227	4.03024	0.655997	0.294786	0.0174741	0.968257		0.677503	0.30445	0.018047	#24-		FELDSPAR		0.71
254.4	50.87	0.16	30.66	0.14	0.26	13.38	3.33	0.31		99.11		2.31984	1.64788	0.0278404	0.00540767	0.00548703	0.0176736	4.02413	0.653748	0.294434	0.018035	0.966217		0.676606	0.304729	0.0186656	#25-		FELDSPAR		0.73
265	51.15	0.21	30.42	0.14	0.36	13.26	3.21	0.34		99.09		2.33116	1.63396	0.0270608	0.00540431	0.00719725	0.024456	4.02924	0.647482	0.283647	0.0197681	0.950897		0.680917	0.298294	0.0207888	#26-		FELDSPAR		0.71
275.6	50.62	0.25	30.71	0.18	0.22	13.2	3.37	0.33		98.88		2.31158	1.65281	0.0336067	0.00696218	0.00858514	0.0149749	4.02852	0.64583	0.298376	0.0192247	0.963431		0.670344	0.309701	0.0199544	#27-		FELDSPAR		0.88
286.2	50.78	0.18	30.73	0.19	0.39	13.25	3.41	0.28		99.21		2.31491	1.65105	0.0251618	0.00733637	0.00617071	0.026501	4.03113	0.647166	0.3014	0.0162839	0.96485		0.670743	0.31238	0.0168771	#28-		FELDSPAR		0.66
296.8	51.15	0.2	30.85	0.17	0.32	12.88	3.38	0.29		99.24		2.32571	1.65318	0.0258567	0.00654702	0.00683848	0.0216878	4.03981	0.627455	0.29797	0.0168215	0.942246		0.665914	0.316234	0.0178526	#29-		FELDSPAR		0.68
307.4	50.96	0.22	30.55	0.11	0.35	13.36	3.38	0.27		99.2		2.32198	1.64058	0.0270548	0.0042453	0.0075383	0.0237713	4.02517	0.65222	0.298602	0.0156947	0.966517		0.674815	0.308947	0.0162384	#30-		FELDSPAR		0.71
318	50.92	0.27	30.66	0.19	0.3	13.23	3.32	0.33		99.22		2.32006	1.64641	0.0255295	0.00733248	0.00925115	0.0203746	4.02897	0.645846	0.293289	0.0191816	0.958317		0.673938	0.306046	0.0200159	#31-		FELDSPAR		0.67
328.6	51.13	0.22	30.62	0.14	0.25	12.92	3.47	0.23		98.98		2.32899	1.64381	0.0304745	0.00540138	0.00753589	0.0169741	4.03318	0.630538	0.306456	0.0133653	0.950359		0.663474	0.322463	0.0140634	#32-		FELDSPAR		0.8
339.2	51.4	0.16	30.22	0.13	0.34	13.14	3.52	0.24		99.15		2.34223	1.623	0.0236273	0.0050176	0.00548287	0.0230941	4.02245	0.641535	0.310997	0.013952	0.966484		0.663782	0.321782	0.0144358	#33-		FELDSPAR		0.62
349.8	51.16	0.15	30.6	0.13	0.32	13.08	3.49	0.18		99.11		2.3301	1.64256	0.0259005	0.00501502	0.00513754	0.0217245	4.03043	0.638276	0.308188	0.0104586	0.956923		0.667009	0.322061	0.0109294	#34-		FELDSPAR		0.68
360.4	51.03	0.28	30.48	0.22	0.31	13.15	3.39	0.3		99.16		2.32447	1.63632	0.0289513	0.00848803	0.00959129	0.0210482	4.02887	0.641773	0.299395	0.0174332	0.958602		0.669489	0.312325	0.0181861	#35-		FELDSPAR		0.76
371	51.12	0.2	30.58	0.11	0.4	13.02	3.4	0.32		99.15		2.32939	1.64227	0.0236264	0.0042455	0.00685333	0.0271685	4.03355	0.635652	0.300384	0.018602	0.954637		0.665857	0.314657	0.0194859	#36-		FELDSPAR		0.62
381.6	51	0.14	30.59	0.08	0.38	12.98	3.64	0.3		99.11		2.32495	1.64353	0.0274493	0.00308901	0.00479946	0.0258216	4.02964	0.633981	0.32173	0.0174471	0.973158		0.651467	0.330604	0.0179283	#37-		FELDSPAR		0.72
392.2	51.25	0.2	30.53	0.17	0.31	13.04	3.46	0.29		99.25		2.33266	1.63772	0.0243609	0.00655379	0.00684556	0.0210318	4.02918	0.635907	0.305338	0.0168389	0.958084		0.663728	0.318697	0.0175756	#38-		FELDSPAR		0.64
402.8	51.19	0.25	30.73	0.12	0.28	13.04	3.52	0.27		99.4		2.32767	1.64685	0.0220557	0.00462172	0.00854864	0.018978	4.02873	0.63529	0.310332	0.0156624	0.961284		0.660876	0.32283	0.0162932	#39-		FELDSPAR		0.58
413.4	50.27	0.17	31.34	0.11	0.22	13.71	3.01	0.28		99.11		2.29305	1.68484	0.0282288	0.00424995	0.00583143	0.0149583	4.03117	0.670039	0.266206	0.0162938	0.952539		0.703424	0.27947	0.0171056	#40-		FELDSPAR		0.74
424	50.21	0.24	31.2	0.17	0.41	13.71	3	0.28		99.22		2.29016	1.6772	0.0259382	0.00656764	0.00823203	0.027875	4.03597	0.669992	0.265303	0.0162926	0.951588		0.704078	0.278801	0.0171215	#41-		FELDSPAR		0.68
434.6	49.71	0.29	31.29	0.23	0.43	13.75	3.08	0.28		99.06		2.27369	1.68674	0.0275408	0.00891048	0.00997484	0.0293165	4.03617	0.673826	0.27314	0.0163382	0.963304		0.699495	0.283545	0.0169606	#42-		FELDSPAR		0.72
445.2	50.36	0.27	31.12	0.25	0.28	13.45	3.1	0.28		99.11		2.29693	1.67285	0.028226	0.00965801	0.00926075	0.019036	4.03596	0.657267	0.274139	0.0162922	0.947698		0.693541	0.289268	0.0171913	#43-		FELDSPAR		0.74
455.8	49.52	0.24	31.89	0.17	0.38	13.61	3.1	0.24		99.15		2.26114	1.71616	0.0274938	0.00657478	0.00824097	0.0258634	4.04547	0.665828	0.274445	0.0139803	0.954253		0.697748	0.287602	0.0146505	#44-		FELDSPAR		0.72
466.4	50.56	0.14	30.94	0.07	0.38	13.35	3.36	0.25		99.05		2.30661	1.66358	0.0289959	0.0027049	0.00480304	0.0258408	4.03253	0.652538	0.297203	0.0145501	0.964291		0.676702	0.308209	0.0150889	#45-		FELDSPAR		0.76
477	50.72	0.26	30.78	0.17	0.15	13.52	3.21	0.28		99.09		2.31298	1.65431	0.0293657	0.00656641	0.00891635	0.0101962	4.02234	0.660583	0.283821	0.0162896	0.960694		0.68761	0.295434	0.016956	#46-		FELDSPAR		0.77
487.6	50.66	0.15	30.81	0.11	0.29	13.81	3.25	0.24		99.32		2.30895	1.65499	0.0255376	0.00424647	0.00514116	0.0197017	4.01857	0.674374	0.287197	0.0139547	0.975525		0.691293	0.294402	0.0143048	#47-		FELDSPAR		0.67
498.2	50.25	0.15	31.12	0.12	0.4	13.71	3.14	0.24		99.13		2.29381	1.67424	0.0267224	0.00463968	0.00514912	0.0272168	4.03177	0.670527	0.277906	0.0139763	0.962409		0.696717	0.288761	0.0145222	#48-		FELDSPAR		0.7
508.8	50.2	0.13	31.06	0.11	0.35	13.92	3.14	0.3		99.21		2.29231	1.67158	0.0267316	0.0042545	0.00446411	0.0238229	4.02317	0.681032	0.278001	0.0174763	0.976509		0.697414	0.284689	0.0178967	#49-		FELDSPAR		0.7
519.4	50.24	0.16	31.16	0.13	0.43	13.59	3.14	0.22		99.07		2.29408	1.67692	0.0255853	0.00502792	0.00549415	0.0292674	4.03638	0.66487	0.277994	0.0128157	0.95568		0.695703	0.290887	0.01341	#50-		FELDSPAR		0.67
530	50.51	0.3	31.04	0.14	0.16	13.61	3.11	0.28		99.15		2.30405	1.66876	0.0255591	0.00540915	0.010291	0.0108791	4.02495	0.665168	0.275057	0.0162942	0.956519		0.695405	0.28756	0.0170349	#51-		FELDSPAR		0.67
540.6	50.36	0.23	31.09	0.12	0.36	13.63	3.04	0.3		99.13		2.29774	1.67183	0.0267097	0.00463748	0.00789157	0.0244835	4.03329	0.666298	0.268928	0.017462	0.952688		0.699388	0.282283	0.0183292	#52-		FELDSPAR		0.7
551.2	49.91	0.22	31.3	0.15	0.3	13.84	3.1	0.29		99.11		2.27988	1.68509	0.0301792	0.00580365	0.00755732	0.0204268	4.02894	0.677357	0.274557	0.0168998	0.968814		0.699161	0.283395	0.0174438	#53-		FELDSPAR		0.79
561.8	49.45	0.16	31.65	0.12	0.38	14.65	2.72	0.21		99.34		2.25919	1.70418	0.0252166	0.00464358	0.00549701	0.0258777	4.0246	0.717103	0.240936	0.0122395	0.970278		0.739069	0.248316	0.0126144	#54-		FELDSPAR		0.66
572.4	49.33	0.16	31.54	0.14	0.39	14.49	2.7	0.25		99		2.26012	1.70309	0.0272041	0.00543292	0.00551265	0.0266342	4.02799	0.711289	0.239845	0.0146123	0.965746		0.736517	0.248352	0.0151306	#55-		FELDSPAR		0.71
583	48.85	0.34	31.85	0.23	0.22	14.5	2.66	0.23		98.88		2.23983	1.72114	0.0329765	0.00893232	0.0117233	0.0150359	4.02964	0.712322	0.236472	0.0134536	0.962247		0.740269	0.245749	0.0139814	#56-		FELDSPAR		0.86
593.6	49.63	0.32	31.37	0.07	0.45	14.14	2.82	0.26		99.06		2.268	1.68954	0.0321021	0.00270946	0.0109969	0.0306526	4.034	0.692318	0.249859	0.0151576	0.957334		0.723173	0.260994	0.0158331	#57-		FELDSPAR		0.84
604.2	49.58	0.18	31.59	0.12	0.32	14.52	2.73	0.31		99.35		2.26476	1.70067	0.0252124	0.00464282	0.00618313	0.0217882	4.02325	0.710623	0.241782	0.0180649	0.97047		0.732246	0.249139	0.0186146	#58-		FELDSPAR		0.66
614.8	49.22	0.27	31.66	0.1	0.35	14.24	2.88	0.26		98.98		2.25527	1.70971	0.0279728	0.00388099	0.00930339	0.0239045	4.03004	0.699076	0.255856	0.0151981	0.97013		0.7206	0.263734	0.015666	#59-		FELDSPAR		0.73
625.4	50.21	0.2	31.19	0.14	0.18	13.91	3	0.27		99.1		2.29261	1.67846	0.0278753	0.00541445	0.00686739	0.0122509	4.02349	0.680496	0.265588	0.0157276	0.961812		0.707515	0.276133	0.0163521	#60-		FELDSPAR		0.73
636	50.87	0.26	30.6	0.14	0.35	13.23	3.41	0.26		99.12		2.31817	1.64347	0.0297259	0.00540379	0.00891002	0.0237743	4.02946	0.645955	0.301291	0.0151153	0.96236		0.671219	0.313075	0.0157065	#61-		FELDSPAR		0.78
646.6	53.35	0.35	28.89	0.17	0.39	11.39	4.21	0.43		99.18		2.41749	1.54289	0.0269057	0.00652477	0.0119267	0.0263421	4.03207	0.552983	0.369879	0.0248575	0.947719		0.583488	0.390283	0.0262288	#62-		FELDSPAR		0.71

## Sheet: FK3-Pl2
Dist from core	SiO2	TiO2	Al2O3	MnO	MgO	CaO	Na2O	K2O	Total		Si	Al	Fe3	Mn3	Ti	Mg	su1	Ca	Na	K	su2	Compositions	ANORTHITE	HIGH ALBITE	POTASSIUM FELDSPAR	end				FeO
0	48.01	0.22	32.49	0.16	0.37	15.28	2.16	0.2	98.89		2.20686	1.76014	0.0276778	0.00622943	0.00760477	0.0253513	4.03387	0.75253	0.192506	0.0117282	0.956764		0.786537	0.201205	0.0122582	#1-		FELDSPAR		0.72
10	49.6	0.16	31.72	0.17	0.5	14.16	2.68	0.24	99.23		2.26512	1.70725	0.0236787	0.00657573	0.00549478	0.0340357	4.04216	0.692836	0.237296	0.0139823	0.944114		0.733847	0.251343	0.01481	#3-		FELDSPAR		0.62
20	50.11	0.19	31.33	0.13	0.4	14.06	2.7	0.24	99.16		2.28562	1.68421	0.0274643	0.00502238	0.0065171	0.0271954	4.03603	0.687105	0.238776	0.0139653	0.939847		0.731082	0.254059	0.0148591	#4-		FELDSPAR		0.72
30	48.77	0.18	32.1	0.12	0.31	15.08	2.32	0.18	99.06		2.23382	1.73283	0.0294946	0.00465546	0.00619997	0.0211648	4.02817	0.74004	0.20603	0.0105179	0.956588		0.773624	0.21538	0.0109952	#5-		FELDSPAR		0.77
40	48.19	0.25	33.25	0.05	0.38	14.49	2.35	0.29	99.25		2.20318	1.7916	0.0252345	0.0019362	0.00859518	0.025896	4.05645	0.709774	0.208309	0.0169142	0.934997		0.759119	0.222791	0.0180901	#8-		FELDSPAR		0.66
50	48.26	0.21	32.5	0.1	0.31	15.36	2.34	0.19	99.27		2.21212	1.75574	0.0245333	0.00388245	0.0072387	0.0211806	4.02469	0.754344	0.207962	0.0111105	0.973416		0.774945	0.213641	0.0114139	#10-		FELDSPAR		0.64
60	48.15	0.17	32.61	0.13	0.34	15.47	2.2	0.23	99.3		2.2059	1.76075	0.0272022	0.00504451	0.00585679	0.023218	4.02797	0.759343	0.195416	0.0134424	0.968202		0.784282	0.201834	0.0138839	#12-		FELDSPAR		0.71
70	48.3	0.15	32.56	0.06	0.23	15.36	2.15	0.25	99.06		2.21627	1.76082	0.0257102	0.00233191	0.00517591	0.0157311	4.02604	0.755134	0.191276	0.0146344	0.961044		0.785743	0.199029	0.0152276	#14-		FELDSPAR		0.67
80	49.85	0.26	31.48	0.2	0.36	13.76	2.89	0.3	99.1		2.27596	1.69391	0.0290181	0.00773419	0.00892675	0.0244995	4.04004	0.673093	0.255825	0.0174735	0.946392		0.71122	0.270317	0.0184632	#15-		FELDSPAR		0.76
90	49.4	0.14	31.78	0.09	0.26	14.67	2.65	0.23	99.22		2.25917	1.7129	0.024477	0.00348619	0.00481473	0.0177236	4.02258	0.718804	0.234972	0.0134187	0.967195		0.743185	0.242942	0.0138738	#16-		FELDSPAR		0.64
100	49.19	0.24	31.97	0.16	0.28	14.5	2.58	0.25	99.17		2.25137	1.72452	0.0218173	0.00620264	0.00826043	0.0191022	4.03128	0.711044	0.228948	0.0145972	0.954589		0.744869	0.23984	0.0152916	#17-		FELDSPAR		0.57
110	49.54	0.12	31.74	0.16	0.3	14.35	2.72	0.21	99.14		2.2636	1.70925	0.0278947	0.00619226	0.0041233	0.0204325	4.03149	0.702511	0.240968	0.0122411	0.95572		0.735059	0.252132	0.0128083	#18-		FELDSPAR		0.73
120	48.08	0.24	32.52	0.17	0.38	15.2	2.3	0.17	99.06		2.20619	1.75867	0.0283966	0.00660713	0.00828152	0.0259907	4.03413	0.747273	0.204622	0.00995143	0.961847		0.776915	0.212739	0.0103462	#19-		FELDSPAR		0.74
130	48.41	0.15	32.4	0.18	0.3	15.15	2.19	0.2	98.98		2.21907	1.7504	0.0318178	0.00698866	0.00517068	0.020498	4.03394	0.744056	0.194637	0.0116956	0.950389		0.782896	0.204798	0.0123062	#20-		FELDSPAR		0.83
140	48.74	0.16	32.36	0.09	0.27	15.02	2.38	0.22	99.24		2.23065	1.74546	0.024878	0.00348879	0.00550665	0.018419	4.02841	0.736502	0.211188	0.0128448	0.960535		0.766762	0.219865	0.0133726	#21-		FELDSPAR		0.65
150	48.31	0.19	32.47	0.13	0.34	15.09	2.23	0.24	99		2.21458	1.75425	0.0322025	0.00504758	0.0065498	0.0232321	4.03586	0.741141	0.198201	0.0140354	0.953377		0.777385	0.207893	0.0147217	#22-		FELDSPAR		0.84
160	48.73	0.17	32.14	0.17	0.17	15.22	2.11	0.4	99.11		2.23289	1.73569	0.0298897	0.00659789	0.00585788	0.0116112	4.02254	0.74721	0.187456	0.0233824	0.958049		0.779929	0.195665	0.0244063	#23-		FELDSPAR		0.78
170	49.38	0.09	31.97	0.15	0.33	14.44	2.12	0.29	98.77		2.25868	1.72346	0.0332796	0.00581139	0.00309575	0.0224995	4.04682	0.707665	0.188012	0.0169223	0.912599		0.775439	0.206018	0.018543	#24-		FELDSPAR		0.87
180	48.37	0.21	32.47	0.13	0.31	14.94	2.3	0.21	98.94		2.21853	1.7552	0.0295349	0.00505031	0.00724318	0.0211937	4.03675	0.734171	0.204533	0.0122876	0.950992		0.772006	0.215074	0.0129208	#25-		FELDSPAR		0.77
190	48.12	0.14	32.62	0.17	0.41	15.27	2.26	0.2	99.19		2.20589	1.76237	0.027219	0.00660074	0.00482621	0.0280154	4.03492	0.749988	0.200869	0.0116962	0.962553		0.779165	0.208684	0.0121513	#26-		FELDSPAR		0.71
200	49.46	0.23	31.12	0.12	0.37	14.61	2.76	0.32	98.99		2.26624	1.68053	0.0329539	0.00465714	0.00792502	0.0252702	4.01758	0.717232	0.245193	0.0187051	0.98113		0.731027	0.249909	0.0190649	#28-		FELDSPAR		0.86
210	49.33	0.24	31.79	0.14	0.32	14.29	2.71	0.3	99.12		2.25546	1.71305	0.0294422	0.00542173	0.00825194	0.0218087	4.03344	0.700026	0.240237	0.0174986	0.957762		0.730898	0.250832	0.0182703	#29-		FELDSPAR		0.77
220	49.71	0.26	31.63	0.13	0.36	14.21	2.47	0.46	99.23		2.26846	1.70114	0.0293855	0.00502476	0.00892238	0.0244875	4.03742	0.694765	0.21854	0.0267795	0.940084		0.739046	0.232468	0.0284863	#31-		FELDSPAR		0.77
230	44.74	0.15	36.67	0.21	0.37	14.57	1.92	0.29	98.92		2.0548	1.98491	0.0361042	0.00816919	0.00518067	0.0253298	4.11449	0.716953	0.170971	0.0169914	0.904916		0.792288	0.188936	0.0187768	#32-		FELDSPAR		0.94
240	48.19	0.13	32.52	0.17	0.42	15.55	2.08	0.16	99.22		2.20814	1.75621	0.0275904	0.00659788	0.00447954	0.0286863	4.0317	0.76341	0.184791	0.00935294	0.957553		0.79725	0.192982	0.00976754	#33-		FELDSPAR		0.72
250	48.83	0.3	32.19	0.24	0.38	14.46	2.57	0.2	99.17		2.23312	1.73501	0.0283018	0.00929658	0.0103174	0.0259039	4.04196	0.70852	0.22788	0.0116685	0.948069		0.74733	0.240362	0.0123076	#35-		FELDSPAR		0.74
260	49.48	0.26	31.7	0.16	0.37	14.37	2.62	0.2	99.16		2.25983	1.70632	0.0290278	0.00618943	0.00892975	0.0251885	4.03548	0.703169	0.232003	0.0116529	0.946825		0.74266	0.245033	0.0123073	#37-		FELDSPAR		0.76
270	48.62	0.26	32.1	0.32	0.31	15.03	2.29	0.21	99.14		2.22633	1.73235	0.0306352	0.0124111	0.00895302	0.0211589	4.03184	0.737381	0.20331	0.0122674	0.952958		0.773781	0.213346	0.012873	#38-		FELDSPAR		0.8
280	48.25	0.23	32.61	0.09	0.37	15.23	2.16	0.22	99.16		2.21199	1.76194	0.0241536	0.00349473	0.00792928	0.0252838	4.03479	0.748071	0.191993	0.0128667	0.95293		0.785021	0.201477	0.0135022	#40-		FELDSPAR		0.63
290	49.58	0.28	31.38	0.14	0.34	14.22	2.82	0.32	99.08		2.26855	1.6922	0.0283159	0.0054257	0.00963432	0.0231887	4.02731	0.697107	0.250172	0.0186789	0.965957		0.721675	0.258988	0.0193372	#41-		FELDSPAR		0.74
300	49.74	0.18	31.56	0.16	0.32	14.27	2.8	0.27	99.3		2.27038	1.6978	0.0263389	0.00618584	0.00617854	0.021772	4.02865	0.69787	0.247798	0.0157223	0.96139		0.725897	0.25775	0.0163537	#42-		FELDSPAR		0.69
310	49.62	0.15	31.86	0.08	0.37	14.25	2.79	0.2	99.32		2.26485	1.71389	0.0221394	0.00309284	0.00514866	0.0251733	4.03429	0.696874	0.246907	0.0116458	0.955427		0.729385	0.258426	0.0121891	#43-		FELDSPAR		0.58
320	49.31	0.32	31.82	0.15	0.35	14.25	2.77	0.22	99.19		2.25303	1.71352	0.0282762	0.0058051	0.0109952	0.0238373	4.03547	0.697598	0.245391	0.0128237	0.955813		0.729848	0.256736	0.0134166	#44-		FELDSPAR		0.74
330	50.07	0.19	31.45	0.14	0.26	14.13	2.74	0.25	99.23		2.28421	1.69097	0.0247986	0.00540969	0.00651828	0.0176802	4.02958	0.69065	0.242357	0.0145498	0.947557		0.728874	0.25577	0.0153551	#45-		FELDSPAR		0.65
340	49.25	0.3	31.65	0.19	0.3	14.61	2.63	0.24	99.17		2.25382	1.70704	0.026407	0.00736467	0.0103242	0.020464	4.02542	0.716344	0.233355	0.0140115	0.96371		0.743319	0.242142	0.0145391	#46-		FELDSPAR		0.69
350	50.19	0.24	31.14	0.14	0.28	13.94	2.99	0.31	99.23		2.29182	1.67586	0.0236762	0.00541474	0.0082413	0.019058	4.02407	0.682	0.264717	0.0180586	0.964775		0.7069	0.274382	0.0187179	#47-		FELDSPAR		0.62
360	49.47	0.22	31.36	0.2	0.47	13.96	3.1	0.31	99.09		2.26435	1.69174	0.0290918	0.00775384	0.00757259	0.0320667	4.03257	0.684612	0.275112	0.0181018	0.977825		0.700137	0.281351	0.0185123	#48-		FELDSPAR		0.76
370	49.79	0.23	31.24	0.15	0.33	14.04	2.95	0.31	99.04		2.27738	1.68407	0.0294538	0.00581127	0.00791121	0.022499	4.02713	0.688049	0.261615	0.018089	0.967753		0.710975	0.270333	0.0186918	#49-		FELDSPAR		0.77
380	47.68	0.21	34.89	0.14	0.34	12.79	2.9	0.28	99.23		2.17112	1.87243	0.0289413	0.00539961	0.00719099	0.0230772	4.10816	0.623989	0.256031	0.0162654	0.896286		0.696194	0.285658	0.0181476	#50-		FELDSPAR		0.76
390	50.01	0.14	31.29	0.14	0.49	13.69	3.26	0.23	99.25		2.28395	1.68419	0.022534	0.00541557	0.00480816	0.0333566	4.03426	0.669872	0.288666	0.0134004	0.971938		0.689213	0.297	0.0137873	#51-		FELDSPAR		0.59
400	49.72	0.18	31.69	0.17	0.44	14.07	2.8	0.26	99.33		2.26771	1.70347	0.0255557	0.00656737	0.00617376	0.0299134	4.03939	0.687557	0.247606	0.0151282	0.950291		0.723522	0.260558	0.0159196	#52-		FELDSPAR		0.67
410	49.53	0.17	31.73	0.19	0.32	14.15	2.89	0.23	99.21		2.2629	1.70853	0.0263635	0.00735253	0.00584073	0.0217923	4.03278	0.692646	0.256001	0.0134055	0.962053		0.719967	0.266099	0.0139343	#53-		FELDSPAR		0.69
420	49.35	0.24	32.11	0.14	0.46	13.1	3.36	0.29	99.05		2.25476	1.72905	0.0282749	0.00541784	0.00824602	0.0313275	4.05708	0.641271	0.297645	0.0169032	0.955819		0.670912	0.311403	0.0176845	#54-		FELDSPAR		0.74
430	50.53	0.3	30.76	0.27	0.33	13.34	3.28	0.32	99.13		2.3051	1.6538	0.0293756	0.0104325	0.0102916	0.0224393	4.03143	0.652009	0.290109	0.018623	0.960741		0.678652	0.301964	0.019384	#55-		FELDSPAR		0.77
440	49.52	0.33	31.42	0.18	0.24	14.37	2.8	0.25	99.11		2.26598	1.69448	0.02717	0.00697643	0.0113556	0.0163698	4.02233	0.704514	0.248416	0.014594	0.967524		0.728162	0.256755	0.0150838	#56-		FELDSPAR		0.71
450	49.87	0.26	31.3	0.15	0.27	14.19	2.77	0.28	99.09		2.2794	1.68609	0.0275214	0.00580709	0.00893666	0.018395	4.02615	0.694898	0.245475	0.0163267	0.9567		0.726349	0.256585	0.0170656	#57-		FELDSPAR		0.72
460	50.3	0.12	31.24	0.14	0.39	13.52	3.41	0.31	99.43		2.29309	1.67849	0.0221124	0.00540587	0.0041139	0.0265016	4.02971	0.660369	0.301407	0.018029	0.979805		0.67398	0.307619	0.0184006	#58-		FELDSPAR		0.58
470	50.41	0.22	31.13	0	0.28	13.74	3.11	0.22	99.11		2.30043	1.67428	0.025188	0	0.00754982	0.0190461	4.0265	0.671796	0.27517	0.0128078	0.959773		0.699953	0.286703	0.0133446	#59-		FELDSPAR		0.66
480	43.89	0.27	37.97	0.14	0.55	13.66	2.25	0.26	98.99		2.01335	2.05282	0.0337592	0.00543961	0.00931405	0.0376073	4.15229	0.671371	0.200117	0.0152155	0.886703		0.757154	0.225686	0.0171596	#60-		FELDSPAR		0.88
490	50.01	0.18	31.12	0.17	0.45	13.76	3.1	0.26	99.05		2.28326	1.67453	0.0339816	0.00657404	0.00618004	0.0306243	4.03515	0.673091	0.274414	0.0151436	0.962649		0.699207	0.285061	0.0157312	#61-		FELDSPAR		0.89
500	50.28	0.21	30.98	0.14	0.35	13.84	3.09	0.31	100.01		2.29352	1.6655	0.0308992	0.00540904	0.00720355	0.0237974	4.02632	0.676395	0.273283	0.0180396	0.967717		0.698959	0.282399	0.0186414	#62-		FELDSPAR		0.81

## Sheet: FK20-Pl1
Dist from core	SiO2	TiO2	Al2O3	MnO	MgO	CaO	Na2O	K2O	Total		Si	Al	Fe3	Mn3		Ti	Mg	su1		Ca	Na	K	su2	Compositions	ANORTHITE	HIGH ALBITE	POTASSIUM FELDSPAR	end				FeO
0	51.5	0.22	31.79	0.1	0.21	11.7	3.58	0.19	99.29		2.32964	1.69484	0.0226981	0.00383149		0.00748386	0.0141598	4.07266		0.567056	0.313987	0.0109646	0.892008		0.635707	0.352001	0.0122921	#1-		FELDSPAR		0.6
12.5	50	0.23	33.32	0.2	0.41	11.3	3.52	0.32	99.3		2.2651	1.77901	0.0227314	0.00767422		0.0078355	0.0276859	4.11004		0.548472	0.309177	0.0184938	0.876143		0.626007	0.352885	0.0211082	#2-		FELDSPAR		0.6
25	49.54	0.11	33.87	0.17	0.37	11.47	3.38	0.21	99.12		2.24585	1.80965	0.0265386	0.00652767		0.00375005	0.0250024	4.11731		0.557115	0.29709	0.0121451	0.86635		0.64306	0.342921	0.0140187	#3-		FELDSPAR		0.7
37.5	49.68	0.2	33.91	0.22	0.36	11.1	3.49	0.26	99.22		2.2501	1.81011	0.023105	0.00843974		0.00681195	0.0243041	4.12287		0.538643	0.306473	0.0150229	0.86014		0.626228	0.356307	0.0174656	#4-		FELDSPAR		0.61
50	51.58	0.17	32.27	0.18	0.35	11.17	3.56	0.18	99.46		2.3257	1.71486	0.0203621	0.00687434		0.00576425	0.0235232	4.09708		0.539615	0.311222	0.0103539	0.86119		0.626592	0.361385	0.0120228	#5-		FELDSPAR		0.54
62.5	50.6	0.16	33.29	0.15	0.38	10.78	3.69	0.24	99.29		2.28675	1.77312	0.0207868	0.00574177		0.00543762	0.0255981	4.11744		0.521969	0.323327	0.0138369	0.859133		0.607554	0.376341	0.0161056	#6-		FELDSPAR		0.55
75	51.07	0.11	32.96	0.09	0.21	10.46	4.05	0.23	99.18		2.30928	1.75652	0.0192858	0.00344698		0.00374045	0.0141542	4.10643		0.506757	0.355069	0.0132677	0.875094		0.579089	0.405749	0.0151615	#7-		FELDSPAR		0.51
87.5	48.97	0.28	33.02	0.19	0.32	13.3	2.85	0.31	99.24		2.23235	1.77404	0.0251612	0.00733619		0.00959865	0.0217439	4.07023		0.649592	0.251897	0.0180282	0.919517		0.706449	0.273945	0.0196061	#8-		FELDSPAR		0.66
100	50.78	0.27	32.49	0.19	0.36	11.47	3.53	0.18	99.27		2.29597	1.73133	0.0279809	0.00727634		0.00918033	0.0242623	4.096		0.555642	0.309453	0.0103826	0.875477		0.634673	0.353468	0.0118593	#9-		FELDSPAR		0.74
112.5	51.22	0.14	32.83	0.12	0.47	10.63	3.78	0.15	99.34		2.3107	1.74555	0.0192411	0.00458534		0.00474956	0.0316052	4.11643		0.513802	0.330631	0.00863285	0.853065		0.602301	0.38758	0.0101198	#10-		FELDSPAR		0.51
125	51.86	0.1	31.82	0.12	0.35	10.94	3.76	0.27	99.22		2.34328	1.69452	0.0215388	0.00459259		0.00339791	0.023573	4.0909		0.529622	0.329401	0.0155637	0.874587		0.605568	0.376637	0.0177955	#11-		FELDSPAR		0.57
137.5	51.96	0.05	31.82	0	0.45	10.89	3.84	0.2	99.21		2.34696	1.69392	0.0203979	0		0.00169835	0.0302973	4.09327		0.527013	0.33629	0.0115246	0.874828		0.602419	0.384407	0.0131735	#12-		FELDSPAR		0.54
150	52.12	0.07	31.65	0	0.27	11.1	3.97	0.22	99.4		2.35392	1.68468	0.0166187	0		0.00237742	0.0181764	4.07578		0.537117	0.347637	0.0126756	0.897429		0.598506	0.387369	0.0141244	#13-		FELDSPAR		0.44
162.5	51.33	0.2	31.97	0.1	0.27	11.56	3.55	0.36	99.34		2.32338	1.70548	0.0204408	0.00383384		0.00680768	0.0182166	4.07816		0.560614	0.311547	0.0207878	0.892949		0.627823	0.348897	0.02328	#14-		FELDSPAR		0.54
175	51.35	0.13	32.01	0.18	0.38	11.45	3.65	0.26	99.41		2.32118	1.70533	0.0219256	0.00689169		0.00441908	0.025604	4.08535		0.554537	0.319895	0.0149934	0.889426		0.623478	0.359665	0.0168574	#15-		FELDSPAR		0.58
187.5	50.31	0.3	32.61	0.18	0.41	12	3.34	0.25	99.4		2.27946	1.74135	0.0227345	0.00690775		0.0102216	0.0276897	4.08836		0.582529	0.293408	0.0144503	0.890387		0.654242	0.329529	0.0162292	#16-		FELDSPAR		0.6
200	49.57	0.18	33.69	0.11	1.13	11.56	2.9	0.21	99.35		2.24137	1.79536	0.0242008	0.00421282		0.00612051	0.0761603	4.14742		0.560028	0.254237	0.0121136	0.826379		0.677689	0.307652	0.0146586	#17-		FELDSPAR		0.64
212.5	44.55	0.19	40.94	0.11	0.33	9.38	3.37	0.24	99.11		2.01779	2.18541	0.0231055	0.00421995		0.00647148	0.0222792	4.25928		0.455187	0.295941	0.0138675	0.764996		0.595019	0.386854	0.0181276	#18-		FELDSPAR		0.61
225	50.74	0.12	32.86	0.21	0.33	11.48	3.41	0.18	99.33		2.2937	1.75069	0.0223046	0.00804066		0.00407933	0.022236	4.10106		0.556015	0.298874	0.0103805	0.865269		0.642592	0.345411	0.0119968	#19-		FELDSPAR		0.59
237.5	50.5	0.15	32.98	0.14	0.45	10.86	3.74	0.29	99.11		2.28795	1.76101	0.0227333	0.00537242		0.00511055	0.0303895	4.11257		0.527161	0.328529	0.0167615	0.872452		0.604229	0.376559	0.0192119	#20-		FELDSPAR		0.6
250	52.4	0.08	31.39	0.11	0.43	10.97	3.9	0.16	99.44		2.36142	1.66721	0.0207282	0.00419876		0.00271115	0.0288846	4.08515		0.529671	0.340764	0.00919858	0.879634		0.60215	0.387393	0.0104573	#21-		FELDSPAR		0.55
262.5	51.68	0.16	31.54	0.05	0.41	11.34	3.86	0.25	99.29		2.3378	1.68152	0.0230765	0.00191576		0.00544284	0.0276455	4.0774		0.549611	0.338547	0.0144272	0.902586		0.60893	0.375086	0.0159844	#22-		FELDSPAR		0.61
275	51.53	0.18	32.2	0.08	0.35	10.95	3.74	0.28	99.31		2.32733	1.71399	0.0215292	0.00306036		0.00611351	0.0235625	4.09558		0.529869	0.327503	0.0161329	0.873505		0.606601	0.37493	0.0184692	#23-		FELDSPAR		0.57
287.5	51.64	0	32.82	0	0.06	11.01	3.88	0.17	99.58		2.3293	1.74475	0.00905331	0		0	0.0040341	4.08715		0.53209	0.339327	0.00978245	0.8812		0.603825	0.385074	0.0111013	#24-		FELDSPAR		0.24
300	51.53	0.17	32.09	0.2	0.34	10.93	3.76	0.25	99.27		2.33004	1.71013	0.018151	0.00765981		0.00578059	0.0229159	4.09467		0.529517	0.329638	0.0144212	0.873577		0.606149	0.377343	0.0165082	#25-		FELDSPAR		0.48
312.5	51.6	0.22	32.11	0.21	0.34	11.22	3.51	0.22	99.43		2.3276	1.70709	0.0215026	0.00802351		0.00746282	0.0228609	4.09454		0.542263	0.306982	0.0126602	0.861906		0.629144	0.356167	0.0146886	#26-		FELDSPAR		0.57
325	51.21	0.21	31.9	0.13	0.46	11.45	3.68	0.25	99.29		2.31895	1.70249	0.0208284	0.00498616		0.00715117	0.0310492	4.08545		0.555521	0.323096	0.0144423	0.893059		0.622042	0.361786	0.0161717	#27-		FELDSPAR		0.55
337.5	51.13	0.25	32.28	0.12	0.32	11.83	3.3	0.24	99.47		2.31212	1.72038	0.0166396	0.00459624		0.00850151	0.0215696	4.08381		0.573163	0.289332	0.0138454	0.87634		0.654041	0.330159	0.0157991	#28-		FELDSPAR		0.44
350	51.07	0.19	32	0.13	0.41	11.77	3.37	0.23	99.17		2.31413	1.70894	0.0227368	0.00498942		0.00647434	0.0276924	4.08496		0.57142	0.296073	0.0132956	0.880788		0.64876	0.336145	0.0150951	#29-		FELDSPAR		0.6
362.5	50.8	0.22	32.01	0.16	0.44	11.81	3.35	0.2	98.99		2.30633	1.71277	0.0242993	0.00615267		0.00751107	0.029776	4.08684		0.574468	0.294883	0.0115837	0.880935		0.652112	0.334739	0.0131493	#30-		FELDSPAR		0.64
375	51.63	0.25	31.72	0.11	0.35	11.58	3.51	0.22	99.37		2.33305	1.68931	0.0215403	0.00421017		0.00849536	0.0235746	4.08018		0.560644	0.307521	0.0126824	0.880848		0.636482	0.34912	0.014398	#31-		FELDSPAR		0.57
387.5	51.84	0.07	31.61	0	0.35	11.4	3.91	0.24	99.42		2.34323	1.68395	0.0192786	0		0.00237941	0.0235816	4.07243		0.552094	0.342668	0.0138395	0.908601		0.60763	0.377138	0.0152316	#32-		FELDSPAR		0.51
400	50.91	0.16	32.69	0.06	0.39	11.55	3.44	0.23	99.43		2.30274	1.74266	0.0151307	0.00229868		0.0054423	0.0262943	4.09456		0.559734	0.30168	0.0132717	0.874686		0.639925	0.344901	0.0151732	#33-		FELDSPAR		0.4
412.5	51.19	0.2	31.49	0.18	0.39	11.98	3.58	0.25	99.26		2.32232	1.6837	0.0216255	0.00691663		0.00682318	0.0263728	4.06775		0.582305	0.314895	0.0144689	0.911669		0.638724	0.345405	0.0158707	#34-		FELDSPAR		0.57
425	52.05	0.14	31.48	0.1	0.2	11.43	3.6	0.23	99.23		2.35173	1.67632	0.0238047	0.00382695		0.00475681	0.0134695	4.07391		0.553313	0.315367	0.0132572	0.881937		0.627384	0.357584	0.015032	#35-		FELDSPAR		0.63
437.5	52.14	0.2	31.48	0.16	0.23	11.4	3.48	0.24	99.33		2.35465	1.67551	0.0188835	0.00612014		0.00679214	0.0154824	4.07744		0.551593	0.304707	0.0138269	0.870126		0.633922	0.350187	0.0158907	#36-		FELDSPAR		0.5
450	51.31	0.18	31.57	0.14	0.5	11.7	3.63	0.24	99.27		2.32471	1.68576	0.022355	0.00537254		0.00613281	0.0337669	4.07809		0.567949	0.318874	0.0138719	0.900695		0.630567	0.354031	0.0154013	#37-		FELDSPAR		0.59
462.5	51.25	0.17	31.83	0.17	0.4	11.76	3.55	0.23	99.36		2.32109	1.69899	0.0185588	0.00652127		0.00578985	0.0270031	4.07794		0.57064	0.311726	0.0132887	0.895654		0.637121	0.348042	0.0148369	#38-		FELDSPAR		0.49
475	50.68	0.22	32.1	0.16	0.4	11.98	3.3	0.21	99.05		2.29925	1.71637	0.0280762	0.00614831		0.00750574	0.0270499	4.0844		0.582324	0.290276	0.0121542	0.884754		0.658176	0.328087	0.0137374	#39-		FELDSPAR		0.74
487.5	50.79	0.12	32.61	0.08	0.33	11.56	3.61	0.25	99.35		2.29932	1.73991	0.0200656	0.00306758		0.00408529	0.0222685	4.08872		0.560707	0.316865	0.0144384	0.892011		0.628588	0.355226	0.0161864	#40-		FELDSPAR		0.53
500	50.89	0.18	32.34	0.11	0.45	11.37	3.62	0.25	99.21		2.30435	1.72588	0.0238568	0.00421885		0.00612927	0.0303727	4.09481		0.551612	0.317812	0.0144416	0.883866		0.62409	0.359571	0.0163391	#41-		FELDSPAR		0.63
512.5	50.28	0.18	33.28	0.09	0.32	11.51	3.45	0.22	99.33		2.27575	1.77529	0.0204399	0.0034503		0.00612664	0.0215891	4.10264		0.558164	0.302758	0.0127031	0.873625		0.638906	0.346553	0.0145407	#42-		FELDSPAR		0.54
525	50.82	0.21	32.05	0.2	0.42	12.04	3.31	0.26	99.31		2.30414	1.71261	0.020475	0.00768051		0.00716002	0.0283844	4.08045		0.584868	0.29097	0.0150385	0.890877		0.656508	0.326611	0.0168806	#43-		FELDSPAR		0.54
537.5	50.59	0.23	31.92	0.15	0.33	12.18	3.38	0.25	99.03		2.29984	1.71022	0.0258522	0.00577577		0.00786288	0.0223616	4.07191		0.593251	0.297918	0.0144988	0.905667		0.655042	0.328949	0.016009	#44-		FELDSPAR		0.68
550	51	0.09	32.14	0.13	0.34	12.4	3.07	0.22	99.39		2.30761	1.71394	0.0234607	0.00498221		0.00306236	0.0229312	4.07599		0.601135	0.269326	0.0126991	0.883161		0.680664	0.304957	0.0143792	#45-		FELDSPAR		0.62
562.5	50.77	0.17	32.45	0.17	0.31	12.3	3.05	0.19	99.41		2.2968	1.73016	0.0223216	0.00651405		0.00578344	0.0209042	4.08249		0.596182	0.267524	0.0109655	0.874672		0.681607	0.305857	0.0125367	#46-		FELDSPAR		0.59
575	50.7	0.19	31.97	0.15	0.35	12.19	3.36	0.24	99.15		2.2996	1.709	0.0299659	0.00576264		0.00648066	0.0236629	4.07448		0.592388	0.295482	0.0138872	0.901757		0.656926	0.327674	0.0154002	#47-		FELDSPAR		0.79
587.5	50.94	0.2	31.81	0.17	0.3	12.16	3.16	0.26	99		2.31312	1.70239	0.0254431	0.00653844		0.00682952	0.0203056	4.07463		0.591603	0.27821	0.0150616	0.884875		0.668573	0.314406	0.0170212	#48-		FELDSPAR		0.67
600	50.95	0.24	31.92	0.07	0.32	12.24	3.33	0.2	99.27		2.30995	1.7056	0.0219908	0.00268808		0.00818257	0.0216254	4.07003		0.594561	0.292718	0.0115677	0.898847		0.661471	0.325659	0.0128695	#49-		FELDSPAR		0.58
612.5	50.97	0.25	32.01	0.15	0.27	11.95	3.28	0.26	99.14		2.31107	1.71057	0.0238889	0.00576071		0.00852433	0.0182482	4.07807		0.58053	0.28835	0.0150394	0.88392		0.656768	0.326217	0.0170145	#50-		FELDSPAR		0.63
625	50.84	0.27	31.64	0.33	0.29	12.14	3.41	0.23	99.15		2.30848	1.69322	0.0258218	0.0126917		0.00921946	0.0196279	4.06906		0.590605	0.300208	0.0133232	0.904136		0.653226	0.332038	0.0147358	#51-		FELDSPAR		0.68
637.5	50.57	0.18	32.68	0.21	0.24	11.49	3.51	0.26	99.14		2.29224	1.74585	0.0242607	0.00806256		0.00613566	0.0162157	4.09276		0.558015	0.308476	0.0150349	0.881526		0.63301	0.349935	0.0170555	#52-		FELDSPAR		0.64
650	50.31	0.09	33.39	0	0.16	11.75	3.33	0.22	99.25		2.27928	1.78285	0.0181861	0		0.00306624	0.0108048	4.09418		0.570346	0.292505	0.0127152	0.875566		0.651402	0.334076	0.0145223	#53-		FELDSPAR		0.48
662.5	50.15	0.23	32.61	0.14	0.4	12.39	3.1	0.24	99.26		2.27673	1.7448	0.0216407	0.00538336		0.00785214	0.027068	4.08347		0.602655	0.272865	0.0138998	0.88942		0.677582	0.30679	0.015628	#54-		FELDSPAR		0.57
675	49.16	0.18	32.02	0.15	0.35	14.57	2.35	0.34	99.12		2.24852	1.72609	0.0271581	0.00581115		0.00619125	0.0238621	4.03763		0.714007	0.208401	0.0198391	0.942247		0.75777	0.221175	0.0210551	#55-		FELDSPAR		0.71
687.5	49.44	0.17	31.53	0.26	0.56	14.06	2.78	0.32	99.12		2.26212	1.70026	0.025637	0.0100762		0.00584934	0.0381927	4.04214		0.689255	0.24662	0.0186786	0.954554		0.72207	0.258362	0.0195679	#56-		FELDSPAR		0.67
700	50.99	0.08	31.56	0.13	0.43	12.18	3.6	0.24	99.21		2.31515	1.68884	0.0243014	0.00499947		0.00273153	0.0291017	4.06512		0.592515	0.316916	0.0139016	0.923333		0.641714	0.34323	0.0150559	#57-		FELDSPAR		0.64
712.5	50.95	0.2	31.65	0.16	0.13	12.82	3.17	0.19	99.27		2.31235	1.69293	0.0239115	0.00615058		0.00682591	0.00879446	4.05097		0.623384	0.278943	0.0110007	0.913328		0.682541	0.305414	0.0120447	#58-		FELDSPAR		0.63
725	51.35	0.18	31.47	0.14	0.24	12.09	3.64	0.24	99.35		2.32826	1.68168	0.0200966	0.00537656		0.0061374	0.0162203	4.05777		0.58732	0.319992	0.0138823	0.921194		0.637564	0.347366	0.0150699	#59-		FELDSPAR		0.53
737.5	51.49	0.18	31.17	0.14	0.23	12.25	3.49	0.28	99.23		2.33561	1.66636	0.024278	0.00537887		0.00614003	0.0155511	4.05332		0.595348	0.306937	0.0162029	0.918488		0.648183	0.334177	0.0176409	#60-		FELDSPAR		0.64
750	51.4	0.16	31.18	0.06	0.32	12.18	3.65	0.31	99.26		2.33316	1.66807	0.022397	0.00230684		0.00546163	0.0216515	4.05304		0.592361	0.321234	0.0179515	0.931546		0.63589	0.344839	0.0192707	#61-		FELDSPAR		0.59
762.5	51.22	0.29	31.25	0.08	0.32	12.46	3.3	0.23	99.15		2.32506	1.67186	0.0254346	0.00307588		0.0098995	0.0216521	4.05698		0.605996	0.290439	0.0133193	0.909755		0.66611	0.31925	0.0146405	#62-		FELDSPAR		0.67
775	50.14	0.21	32.15	0.18	0.44	12.84	2.99	0.2	99.15		2.27937	1.72253	0.0266125	0.0069309		0.00717912	0.0298153	4.07244		0.625394	0.263542	0.011599	0.900535		0.69447	0.29265	0.0128801	#63-		FELDSPAR		0.7
787.5	50.75	0.25	31.08	0.23	0.31	12.62	3.45	0.28	98.97		2.30946	1.6669	0.0357732	0.00886518		0.00855529	0.0210277	4.05058		0.615306	0.304397	0.0162551	0.935958		0.657408	0.325225	0.0173674	#64-		FELDSPAR		0.94

## Sheet: FK20-PLAG 2
Dist from core	SiO2	TiO2	Al2O3	MnO	MgO	CaO	Na2O	K2O		Total		Si	Al	Fe3	Mn3		Ti	Mg	su1		Ca	Na	K	su2	Compositions	ANORTHITE	HIGH ALBITE	POTASSIUM FELDSPAR	end				FeO
0	52.09	0.2	31.69	0.11	0.42	10.6	4.02	0.27		99.4		2.3499	1.6849	0.0192	0.0042		0.0068	0.0282	4.0932		0.5123	0.3516	0.0155	0.8795		0.5825	0.3998	0.0177	#1-		FELDSPAR		0.51
11.5	52.02	0.12	31.65	0.17	0.31	10.96	3.83	0.19		99.25		2.3495	1.6847	0.0212	0.0065		0.0041	0.0209	4.0868		0.5304	0.3354	0.0109	0.8767		0.605	0.3826	0.0125	#2-		FELDSPAR		0.56
23	52.31	0.2	31.39	0.11	0.21	10.87	4.06	0.2		99.35		2.3589	1.6683	0.0249	0.0042		0.0068	0.0141	4.0772		0.5252	0.355	0.0115	0.8917		0.589	0.3981	0.0129	#3-		FELDSPAR		0.66
34.5	51.44	0.25	31.79	0.24	0.44	11.01	3.96	0.18		99.31		2.327	1.6949	0.0204	0.0092		0.0085	0.0297	4.0897		0.5336	0.3473	0.0104	0.8914		0.5987	0.3897	0.0117	#4-		FELDSPAR		0.54
46	50.98	0.1	32.24	0.17	0.33	11.73	3.46	0.25		99.26		2.3083	1.7204	0.0239	0.0065		0.0034	0.0223	4.0848		0.569	0.3037	0.0144	0.8872		0.6414	0.3424	0.0163	#5-		FELDSPAR		0.63
57.5	51.63	0.13	32.18	0.06	0.12	11.35	3.57	0.19		99.23		2.3335	1.7141	0.02	0.0023		0.0044	0.0081	4.0824		0.5496	0.3128	0.011	0.8734		0.6293	0.3582	0.0125	#6-		FELDSPAR		0.53
69	52.29	0	32.47	0	0.28	10.38	4.06	0.13		99.61		2.3516	1.721	0.0105	0		0	0.0188	4.1018		0.5001	0.354	0.0075	0.8616		0.5805	0.4109	0.0087	#7-		FELDSPAR		0.28
80.5	52.07	0.12	32.41	0.14	0.31	10.09	3.87	0.2		99.21		2.3453	1.7205	0.02	0.0053		0.0041	0.0208	4.116		0.4869	0.338	0.0115	0.8364		0.5822	0.4041	0.0137	#8-		FELDSPAR		0.53
92	52.69	0.11	32.17	0	0.27	10.02	4.11	0.22		99.59		2.3693	1.7049	0.0068	0		0.0037	0.0181	4.1029		0.4828	0.3583	0.0126	0.8537		0.5655	0.4197	0.0148	#9-		FELDSPAR		0.18
103.5	52.19	0	32.36	0.07	0.29	10.04	4.12	0.21		99.28		2.3508	1.7179	0.0185	0.0027		0	0.0195	4.1093		0.4845	0.3598	0.0121	0.8564		0.5658	0.4201	0.0141	#10-		FELDSPAR		0.49
115	51.78	0.32	32.21	0.08	0.39	10.03	4.21	0.21		99.23		2.337	1.7133	0.0189	0.0031		0.0109	0.0262	4.1093		0.485	0.3684	0.0121	0.8655		0.5604	0.4257	0.014	#11-		FELDSPAR		0.5
126.5	52.13	0.13	32.14	0.05	0.36	10.02	4.32	0.25		99.4		2.3507	1.7081	0.0136	0.0019		0.0044	0.0242	4.1029		0.4841	0.3777	0.0144	0.8762		0.5525	0.4311	0.0164	#12-		FELDSPAR		0.36
138	52.1	0.26	31.68	0.15	0.38	10.02	4.29	0.3		99.18		2.3526	1.686	0.0219	0.0057		0.0088	0.0256	4.1006		0.4848	0.3756	0.0173	0.8776		0.5524	0.428	0.0197	#13-		FELDSPAR		0.58
149.5	52.19	0.21	31.77	0.1	0.38	10.13	4.2	0.23		99.21		2.3565	1.6906	0.0166	0.0038		0.0071	0.0256	4.1003		0.4901	0.3677	0.0132	0.871		0.5626	0.4221	0.0152	#14-		FELDSPAR		0.44
161	52.28	0	32.59	0.06	0.36	9.5	4.42	0.13		99.34		2.3508	1.7271	0.0173	0.0023		0	0.0241	4.1217		0.4577	0.3854	0.0075	0.8505		0.5381	0.4531	0.0088	#15-		FELDSPAR		0.46
172.5	46.85	0.17	37.47	0.13	0.37	10.16	3.8	0.16		99.11		2.1241	2.0022	0.0262	0.005		0.0058	0.025	4.1882		0.4935	0.334	0.0093	0.8368		0.5898	0.3992	0.0111	#16-		FELDSPAR		0.69
184	48.62	0.15	34.35	0.18	0.46	12.19	2.84	0.35		99.14		2.2107	1.8407	0.0243	0.0069		0.0051	0.0312	4.119		0.5938	0.2504	0.0203	0.8645		0.6869	0.2896	0.0235	#17-		FELDSPAR		0.64
195.5	51.71	0	34.2	0	0.16	9.27	4.14	0.04		99.52		2.317	1.8061	0.0135	0		0	0.0107	4.1472		0.445	0.3597	0.0023	0.807		0.5515	0.4457	0.0028	#18-		FELDSPAR		0.36
207	50.89	0	33.96	0	0.43	9.71	4.13	0.15		99.27		2.2932	1.8035	0.0173	0		0	0.0289	4.1429		0.4688	0.3608	0.0086	0.8382		0.5593	0.4305	0.0103	#19-		FELDSPAR		0.46
218.5	52.25	0.15	31.84	0.1	0.4	10.16	4.08	0.21		99.19		2.3567	1.6926	0.0196	0.0038		0.0051	0.0269	4.1047		0.491	0.3568	0.0121	0.8599		0.571	0.4149	0.0141	#20-		FELDSPAR		0.52
230	52.95	0	31.89	0	0.46	9.76	4.42	0.1		99.58		2.3773	1.6875	0.0124	0		0	0.0308	4.108		0.4695	0.3848	0.0057	0.86		0.5459	0.4474	0.0067	#21-		FELDSPAR		0.33
241.5	52.49	0.17	31.86	0.09	0.28	10.19	4.11	0.16		99.35		2.364	1.6911	0.0162	0.0034		0.0058	0.0188	4.0992		0.4917	0.3589	0.0092	0.8598		0.5719	0.4174	0.0107	#22-		FELDSPAR		0.43
253	52.47	0.15	31.59	0.19	0.29	9.98	4.43	0.23		99.33		2.3652	1.6783	0.0196	0.0073		0.0051	0.0195	4.0949		0.482	0.3872	0.0132	0.8824		0.5462	0.4388	0.015	#23-		FELDSPAR		0.52
264.5	52.49	0.25	31.75	0.23	0.24	9.81	4.22	0.21		99.2		2.3631	1.6846	0.0248	0.0088		0.0085	0.0161	4.1059		0.4732	0.3684	0.0121	0.8536		0.5543	0.4315	0.0141	#24-		FELDSPAR		0.66
276	52.45	0.09	32.06	0	0.37	10.12	4.31	0.15		99.55		2.36	1.7002	0.0124	0		0.003	0.0248	4.1005		0.4879	0.376	0.0086	0.8725		0.5592	0.431	0.0099	#25-		FELDSPAR		0.33
287.5	47.62	0.1	37.08	0.12	0.34	9.96	3.59	0.18		98.99		2.1562	1.9787	0.0246	0.0046		0.0034	0.0229	4.1905		0.4832	0.3152	0.0104	0.8087		0.5974	0.3897	0.0129	#26-		FELDSPAR		0.65
299	51.91	0.09	32.39	0.11	0.28	10.66	3.65	0.2		99.29		2.3403	1.721	0.0177	0.0042		0.0031	0.0188	4.105		0.5149	0.319	0.0115	0.8455		0.609	0.3774	0.0136	#27-		FELDSPAR		0.47
310.5	52.32	0	32.77	0	0.28	10.47	3.72	0.07		99.63		2.347	1.7325	0.0143	0		0	0.0187	4.1126		0.5032	0.3236	0.004	0.8308		0.6057	0.3895	0.0048	#28-		FELDSPAR		0.38
322	52.06	0.07	32	0.13	0.36	10.63	3.83	0.17		99.25		2.3497	1.7022	0.0162	0.005		0.0024	0.0242	4.0997		0.514	0.3352	0.0098	0.859		0.5984	0.3902	0.0114	#29-		FELDSPAR		0.43
333.5	48.55	0.1	36.66	0.13	0.52	9.41	3.68	0.16		99.21		2.1889	1.948	0.0207	0.005		0.0034	0.0349	4.2009		0.4545	0.3217	0.0092	0.7854		0.5787	0.4096	0.0117	#30-		FELDSPAR		0.55
345	52	0.19	32.28	0.17	0.25	10.41	3.97	0.12		99.39		2.3397	1.7118	0.0233	0.0065		0.0064	0.0168	4.1046		0.5018	0.3463	0.0069	0.8551		0.5869	0.405	0.0081	#31-		FELDSPAR		0.62
356.5	51.52	0.2	32.13	0.17	0.37	10.7	3.85	0.25		99.19		2.3302	1.7127	0.0185	0.0065		0.0068	0.0249	4.0996		0.5185	0.3376	0.0144	0.8705		0.5956	0.3878	0.0166	#32-		FELDSPAR		0.49
368	51.08	0.21	32.52	0.14	0.45	10.72	3.82	0.2		99.14		2.3112	1.7342	0.0204	0.0054		0.0071	0.0303	4.1087		0.5197	0.3351	0.0115	0.8663		0.5999	0.3868	0.0133	#33-		FELDSPAR		0.54
379.5	51.17	0.26	32.66	0.16	0.29	11.05	3.62	0.19		99.4		2.3083	1.7364	0.023	0.0061		0.0088	0.0195	4.1022		0.5341	0.3166	0.0109	0.8616		0.6198	0.3675	0.0127	#35-		FELDSPAR		0.61
391	51.09	0.1	32.84	0.06	0.36	11.71	3.18	0.1		99.44		2.3058	1.7468	0.017	0.0023		0.0034	0.0242	4.0995		0.5662	0.2783	0.0058	0.8503		0.666	0.3273	0.0068	#36-		FELDSPAR		0.45
402.5	51.79	0.31	32.38	0.18	0.39	10.69	3.54	0.19		99.47		2.3306	1.7174	0.0199	0.0069		0.0105	0.0262	4.1115		0.5154	0.3089	0.0109	0.8352		0.6171	0.3698	0.0131	#37-		FELDSPAR		0.53
414	51.29	0.26	32.27	0.2	0.33	10.79	3.8	0.31		99.25		2.3197	1.7201	0.0204	0.0077		0.0088	0.0222	4.099		0.5229	0.3332	0.0179	0.874		0.5983	0.3813	0.0205	#38-		FELDSPAR		0.54
425.5	51.78	0.09	32.66	0.05	0.24	10.75	3.61	0.18		99.36		2.3329	1.7342	0.0173	0.0019		0.003	0.0161	4.1055		0.5189	0.3153	0.0103	0.8446		0.6144	0.3734	0.0122	#39-		FELDSPAR		0.46
437	52.01	0.11	32.32	0	0.29	10.93	3.65	0.13		99.44		2.3438	1.7165	0.0132	0		0.0037	0.0195	4.0967		0.5277	0.3189	0.0075	0.8541		0.6179	0.3734	0.0088	#40-		FELDSPAR		0.35
448.5	51.67	0.11	32.42	0.06	0.38	10.93	3.61	0.25		99.43		2.3313	1.724	0.0143	0.0023		0.0037	0.0256	4.1012		0.5284	0.3158	0.0144	0.8586		0.6154	0.3678	0.0168	#41-		FELDSPAR		0.38
460	52.37	0	32.42	0.07	0.24	10.58	3.76	0.1		99.54		2.3521	1.7161	0.0173	0.0027		0	0.0161	4.1042		0.5091	0.3274	0.0057	0.8423		0.6045	0.3887	0.0068	#42-		FELDSPAR		0.46
471.5	47.95	0.17	37.35	0.16	0.39	9.87	3.33	0.13		99.35		2.1612	1.984	0.0192	0.0061		0.0058	0.0262	4.2025		0.4766	0.291	0.0075	0.7751		0.6149	0.3754	0.0096	#43-		FELDSPAR		0.51
483	51.65	0.21	32.29	0.17	0.42	10.72	3.71	0.26		99.43		2.3278	1.7152	0.0215	0.0065		0.0071	0.0282	4.1063		0.5176	0.3242	0.0149	0.8568		0.6042	0.3784	0.0174	#44-		FELDSPAR		0.57
494.5	52.01	0.11	32.1	0.13	0.26	11.06	3.42	0.23		99.32		2.3453	1.7059	0.0185	0.005		0.0037	0.0175	4.0959		0.5343	0.299	0.0132	0.8466		0.6312	0.3532	0.0156	#45-		FELDSPAR		0.49
506	51.6	0.22	32.05	0.22	0.38	10.77	3.7	0.21		99.15		2.3316	1.7068	0.0227	0.0084		0.0075	0.0256	4.1025		0.5214	0.3241	0.0121	0.8577		0.6079	0.3779	0.0141	#46-		FELDSPAR		0.6
517.5	51.77	0.14	32.02	0.18	0.29	10.85	3.61	0.23		99.09		2.3382	1.7044	0.0253	0.0069		0.0048	0.0195	4.0991		0.525	0.3161	0.0133	0.8544		0.6145	0.37	0.0155	#47-		FELDSPAR		0.67
529	51.81	0.23	31.69	0.16	0.4	10.66	4.01	0.24		99.2		2.341	1.6876	0.0242	0.0061		0.0078	0.0269	4.0936		0.5161	0.3513	0.0138	0.8812		0.5856	0.3987	0.0157	#48-		FELDSPAR		0.64
540.5	48.49	0.15	35.91	0.16	0.26	10.8	3.23	0.23		99.23		2.1923	1.9135	0.0246	0.0061		0.0051	0.0175	4.1591		0.5232	0.2831	0.0133	0.8196		0.6383	0.3455	0.0162	#49-		FELDSPAR		0.65
552	48.42	0.2	35.86	0.2	0.43	10.64	3.18	0.18		99.11		2.1906	1.912	0.0242	0.0077		0.0068	0.029	4.1703		0.5157	0.2789	0.0104	0.8051		0.6406	0.3465	0.0129	#50-		FELDSPAR		0.64
563.5	52.33	0.12	31.2	0	0.45	10.71	4.19	0.3		99.3		2.3635	1.6608	0.0219	0		0.0041	0.0303	4.0806		0.5183	0.3669	0.0173	0.9025		0.5743	0.4066	0.0192	#51-		FELDSPAR		0.58
575	49.49	0	36	0	0.66	10.21	2.78	0		99.14		2.2203	1.9035	0.0323	0		0	0.0441	4.2002		0.4908	0.2418	0	0.7326		0.6699	0.3301	0	#52-		FELDSPAR		0.86
586.5	46.94	0.17	37.66	0.16	0.42	10.06	3.61	0.18		99.2		2.1258	2.0101	0.0216	0.0061		0.0058	0.0284	4.1977		0.4881	0.317	0.0104	0.8155		0.5986	0.3887	0.0128	#53-		FELDSPAR		0.57
598	51.91	0.19	31.61	0.08	0.39	11.08	3.98	0.15		99.39		2.3446	1.6827	0.0189	0.0031		0.0065	0.0263	4.0819		0.5362	0.3485	0.0086	0.8934		0.6002	0.3901	0.0097	#54-		FELDSPAR		0.5
609.5	51.61	0.1	32.3	0	0.33	11.22	3.49	0.17		99.22		2.33	1.7186	0.0219	0		0.0034	0.0222	4.0961		0.5427	0.3055	0.0098	0.858		0.6325	0.356	0.0114	#55-		FELDSPAR		0.58
621	50.51	0.18	32.98	0.05	0.41	11.43	3.43	0.19		99.18		2.2866	1.7596	0.0227	0.0019		0.0061	0.0277	4.1047		0.5544	0.3011	0.011	0.8664		0.6399	0.3475	0.0127	#56-		FELDSPAR		0.6
632.5	51.32	0.19	31.89	0.07	0.25	11.66	3.53	0.28		99.19		2.3245	1.7024	0.0231	0.0027		0.0065	0.0169	4.076		0.5658	0.31	0.0162	0.892		0.6343	0.3475	0.0181	#57-		FELDSPAR		0.61
644	51.37	0.25	31.97	0.08	0.41	11.3	3.63	0.21		99.22		2.3253	1.7056	0.0189	0.0031		0.0085	0.0277	4.089		0.548	0.3186	0.0121	0.8787		0.6237	0.3625	0.0138	#58-		FELDSPAR		0.5
655.5	52.11	0.12	31.55	0.08	0.36	11.38	3.62	0.2		99.42		2.3521	1.6784	0.0177	0.0031		0.0041	0.0242	4.0797		0.5504	0.3168	0.0115	0.8787		0.6263	0.3606	0.0131	#59-		FELDSPAR		0.47
667	51.51	0.15	31.44	0.13	0.1	12.01	3.64	0.26		99.24		2.3337	1.6787	0.0265	0.005		0.0051	0.0068	4.0558		0.583	0.3197	0.015	0.9177		0.6352	0.3484	0.0164	#60-		FELDSPAR		0.7
678.5	51.28	0.27	31.54	0.24	0.28	11.84	3.45	0.17		99.07		2.3246	1.6851	0.0269	0.0092		0.0092	0.0189	4.074		0.5751	0.3032	0.0098	0.8881		0.6475	0.3414	0.0111	#61-		FELDSPAR		0.71

## Sheet: KONE 1-Pl1
Dist from core	SiO2	TiO2	Al2O3	MnO	MgO	CaO	Na2O	K2O		Total		Si	Al	Fe3	Mn3		Ti	Mg	su1		Ca	Na	K	su2	Compositions	ANORTHITE	HIGH ALBITE	POTASSIUM FELDSPAR	end				FeO
0	50.21	0.15	31.46	0.09	0.28	13.81	3.14	0.21		99.35		2.28899	1.69032	0.0217313	0.00347522		0.0051424	0.0190269	4.02869		0.674537	0.277543	0.0122133	0.964293		0.699514	0.28782	0.0126655	#1-		FELDSPAR		0.57
10.3	50.14	0.24	31.22	0.07	0.34	13.95	2.99	0.21		99.16		2.28936	1.68003	0.024438	0.00270715		0.00824064	0.02314	4.02792		0.682435	0.264696	0.0122323	0.959363		0.711342	0.275908	0.0127504	#2-		FELDSPAR		0.64
20.6	50.5	0.1	31.04	0.21	0.26	13.92	3.1	0.2		99.33		2.30112	1.66696	0.0255317	0.00810501		0.00342665	0.0176595	4.02281		0.679588	0.273878	0.0116262	0.965092		0.704169	0.283784	0.0120467	#3-		FELDSPAR		0.67
30.9	50.15	0.23	31.41	0.18	0.32	13.7	3	0.24		99.23		2.2877	1.6887	0.0228895	0.00695484		0.00789001	0.0217588	4.0359		0.669587	0.265336	0.0139669	0.94889		0.705653	0.279628	0.0147191	#4-		FELDSPAR		0.6
41.2	50.76	0.13	31.05	0	0.4	13.22	3.33	0.25		99.14		2.31324	1.6677	0.0240102	0		0.00445516	0.0271716	4.03658		0.645489	0.294233	0.0145344	0.954256		0.676432	0.308337	0.0152312	#5-		FELDSPAR		0.63
51.5	50.5	0.18	31.17	0.16	0.31	13.56	3.18	0.22		99.28		2.30125	1.67404	0.0232465	0.00617558		0.0061683	0.0210567	4.03193		0.662048	0.280961	0.0127895	0.955799		0.692665	0.293954	0.013381	#6-		FELDSPAR		0.61
61.8	50.63	0.15	30.97	0.08	0.43	13.66	3.12	0.21		99.25		2.30825	1.66407	0.021351	0.00308923		0.00514264	0.0292212	4.03112		0.66724	0.275788	0.0122138	0.955242		0.698504	0.28871	0.0127861	#7-		FELDSPAR		0.56
72.1	50.6	0.13	31.36	0.08	0.24	13.69	3.23	0.15		99.48		2.30338	1.68247	0.0167504	0.00308455		0.0044502	0.0162848	4.02642		0.667693	0.285079	0.00871095	0.961483		0.694441	0.296499	0.00905991	#8-		FELDSPAR		0.44
82.4	50.77	0.09	30.91	0.09	0.3	13.49	3.2	0.36		99.21		2.31587	1.66173	0.0217439	0.00347724		0.00308723	0.0203978	4.0263		0.659289	0.283011	0.0209492	0.963249		0.684443	0.293809	0.0217485	#9-		FELDSPAR		0.57
92.7	49.69	0.11	31.87	0.15	0.35	14.42	2.67	0.13		99.39		2.26542	1.71245	0.0228764	0.00579237		0.00377132	0.023785	4.03409		0.704373	0.236014	0.00756104	0.947948		0.74305	0.248974	0.00797622	#10-		FELDSPAR		0.6
103	49.76	0.22	31.34	0.12	0.32	14.36	2.85	0.26		99.23		2.27406	1.68802	0.0259889	0.00464504		0.00756077	0.0217986	4.02208		0.703128	0.252531	0.0151584	0.970817		0.724264	0.260122	0.0156141	#11-		FELDSPAR		0.68
113.3	50.36	0.06	31.39	0.13	0.25	13.96	2.93	0.21		99.29		2.29463	1.68567	0.0243872	0.00501714		0.00205588	0.0169794	4.02874		0.681506	0.258846	0.0122069	0.952559		0.715448	0.271737	0.0128148	#12-		FELDSPAR		0.64
123.6	50.45	0.14	31.27	0.08	0.24	13.87	3.04	0.21		99.3		2.29913	1.67952	0.022867	0.003088		0.00479789	0.016303	4.0257		0.677229	0.26861	0.012209	0.958048		0.706884	0.280372	0.0127436	#13-		FELDSPAR		0.6
133.9	50.04	0.22	31.16	0.12	0.43	13.93	3.07	0.3		99.27		2.28757	1.67885	0.0187331	0.00464649		0.00756312	0.029301	4.02666		0.682286	0.272109	0.0174959	0.971891		0.702019	0.279979	0.018002	#14-		FELDSPAR		0.49
144.2	50.16	0.29	31.15	0.15	0.23	13.82	3.14	0.26		99.2		2.29119	1.67694	0.0233018	0.00580338		0.00996145	0.0156598	4.02286		0.676347	0.278087	0.0151508	0.969585		0.697564	0.28681	0.0156261	#15-		FELDSPAR		0.61
154.5	50.2	0.1	31.32	0.12	0.35	14.02	2.86	0.24		99.21		2.29085	1.6845	0.0232798	0.00463832		0.00343174	0.0238077	4.03051		0.685487	0.25305	0.0139721	0.952509		0.719664	0.265667	0.0146688	#16-		FELDSPAR		0.61
164.8	50.29	0.19	31.19	0.18	0.39	13.73	3.05	0.21		99.23		2.29298	1.67606	0.0255476	0.00695149		0.00651469	0.0265057	4.03457		0.67073	0.269629	0.0122151	0.952574		0.704124	0.283053	0.0128233	#17-		FELDSPAR		0.67
175.1	50.24	0.19	31.5	0.17	0.31	13.69	2.92	0.19		99.21		2.28928	1.69167	0.0247696	0.0065612		0.00651063	0.0210555	4.03984		0.668359	0.257976	0.0110449	0.93738		0.713008	0.275209	0.0117827	#18-		FELDSPAR		0.65
185.4	50.46	0.15	31.29	0.12	0.39	13.68	2.97	0.22		99.28		2.29788	1.67935	0.0243734	0.00462857		0.00513679	0.0264728	4.03784		0.667458	0.262231	0.0127809	0.942469		0.708201	0.278238	0.0135611	#19-		FELDSPAR		0.64
195.7	50.21	0.22	31.24	0.17	0.36	13.74	3.04	0.26		99.24		2.28869	1.67828	0.02859	0.00656345		0.0075412	0.02446	4.03413		0.67103	0.268669	0.0151192	0.954818		0.702783	0.281383	0.0158347	#20-		FELDSPAR		0.75
206	49.92	0.18	31.35	0.05	0.35	14.07	3.06	0.22		99.2		2.28088	1.68819	0.0240727	0.00193501		0.00618474	0.023837	4.0251		0.688779	0.271079	0.0128236	0.972682		0.708124	0.278693	0.0131837	#21-		FELDSPAR		0.63
216.3	50.38	0.14	31.49	0.14	0.3	13.64	3.11	0.24		99.44		2.29326	1.68936	0.0213176	0.0053977		0.00479229	0.020355	4.03448		0.665222	0.274474	0.0139368	0.953633		0.697566	0.28782	0.0146145	#22-		FELDSPAR		0.56
226.6	49.5	0.19	31.65	0.17	0.35	14.03	2.96	0.25		99.1		2.2646	1.70654	0.0252515	0.00658752		0.00653674	0.0238677	4.03339		0.687706	0.262558	0.014591	0.964855		0.712755	0.272122	0.0151225	#23-		FELDSPAR		0.66
236.9	49.97	0.16	31.55	0.1	0.31	13.98	2.89	0.2		99.16		2.28133	1.6976	0.0236716	0.00386692		0.00549313	0.0210958	4.03305		0.683823	0.255814	0.0116484	0.951285		0.718841	0.268914	0.0122449	#24-		FELDSPAR		0.62
247.2	49.48	0.16	31.49	0.17	0.44	13.89	3.11	0.24		98.98		2.26507	1.69895	0.0294781	0.00659154		0.00550799	0.0300235	4.03563		0.681259	0.276032	0.0140159	0.971307		0.701384	0.284186	0.01443	#25-		FELDSPAR		0.77
257.5	50.26	0.23	31.15	0.14	0.3	13.85	2.94	0.22		99.09		2.29377	1.67549	0.0274799	0.00541179		0.00789361	0.0204082	4.03045		0.677227	0.260148	0.0128088	0.950184		0.712732	0.273787	0.0134803	#26-		FELDSPAR		0.72
267.8	49.33	0.18	31.59	0.2	0.34	14.36	2.81	0.24		99.05		2.25842	1.70451	0.0287151	0.00775549		0.00619707	0.0232021	4.0288		0.704377	0.249429	0.0140173	0.967823		0.727795	0.257721	0.0144833	#27-		FELDSPAR		0.75
278.1	49.85	0.28	31.24	0.2	0.45	13.8	3.1	0.24		99.16		2.27745	1.68209	0.0271267	0.00773925		0.00961971	0.0306444	4.03467		0.675492	0.274594	0.0139879	0.964074		0.700664	0.284827	0.0145092	#28-		FELDSPAR		0.71
288.4	50.24	0.22	30.88	0.12	0.35	14.01	3.02	0.26		99.1		2.29477	1.66235	0.0294127	0.00464254		0.0075567	0.0238294	4.02255		0.685622	0.26745	0.0151503	0.968222		0.708125	0.276228	0.0156475	#29-		FELDSPAR		0.77
298.7	49.69	0.28	31.62	0.16	0.41	13.95	2.84	0.21		99.16		2.26747	1.70055	0.0293845	0.00618412		0.0096084	0.0278877	4.04109		0.682031	0.251268	0.012225	0.945524		0.721326	0.265745	0.0129294	#30-		FELDSPAR		0.77
309	46.89	0.22	34.63	0.16	0.46	13.67	2.84	0.21		99.08		2.14713	1.8689	0.0291037	0.00620561		0.00757569	0.0313973	4.09032		0.670664	0.252141	0.0122675	0.935072		0.717232	0.269649	0.0131193	#31-		FELDSPAR		0.76
319.3	46.09	0.2	35.38	0.18	0.6	13.67	2.61	0.27		99		2.11328	1.91189	0.0299089	0.0069905		0.00689605	0.0410069	4.10997		0.671547	0.232026	0.0157933	0.919366		0.730445	0.252376	0.0171784	#32-		FELDSPAR		0.78
329.6	49.95	0.12	31.38	0.08	0.34	14.2	2.84	0.19		99.1		2.28123	1.68905	0.0278813	0.00309464		0.00412132	0.0231456	4.02853		0.694832	0.251478	0.01107	0.95738		0.725765	0.262673	0.0115628	#33-		FELDSPAR		0.73
339.9	49.56	0.14	31.84	0.08	0.42	14.24	2.75	0.18		99.21		2.26253	1.71314	0.0259614	0.00309342		0.00480631	0.0285804	4.03811		0.696515	0.243412	0.0104832	0.950411		0.732857	0.256113	0.0110302	#34-		FELDSPAR		0.68
350.2	49.64	0.2	31.77	0.04	0.32	14.39	2.64	0.17		99.17		2.26716	1.71011	0.0244448	0.00154738		0.00686913	0.021785	4.03192		0.704157	0.233777	0.00990509	0.947839		0.742908	0.246642	0.0104502	#35-		FELDSPAR		0.64
360.5	49.78	0.22	31.47	0.08	0.32	14.31	2.77	0.26		99.21		2.274	1.69429	0.0255957	0.00309536		0.00755751	0.0217892	4.02633		0.700379	0.245337	0.0151519	0.960867		0.728903	0.255328	0.015769	#36-		FELDSPAR		0.67
370.8	49.56	0.23	31.69	0.18	0.3	14.19	2.76	0.18		99.09		2.26512	1.70702	0.0267556	0.00696816		0.00790512	0.0204379	4.0342		0.694864	0.244577	0.0104952	0.949937		0.731485	0.257467	0.0110483	#37-		FELDSPAR		0.7
381.1	49.6	0.23	31.53	0.22	0.27	14.39	2.61	0.23		99.08		2.26868	1.6997	0.0256285	0.00852315		0.00791116	0.0184082	4.02885		0.705196	0.231462	0.0134208	0.950079		0.74225	0.243624	0.014126	#38-		FELDSPAR		0.67
391.4	49.64	0.18	31.63	0.26	0.29	14.37	2.59	0.17		99.13		2.26619	1.70184	0.0301611	0.0100536		0.00617955	0.0197341	4.03416		0.702875	0.229251	0.00990082	0.942027		0.746131	0.243359	0.0105101	#39-		FELDSPAR		0.79
401.7	49.33	0.2	31.65	0.14	0.38	14.62	2.59	0.18		99.09		2.25734	1.70693	0.0267879	0.00542624		0.00688233	0.0259194	4.02928		0.716787	0.22979	0.0105079	0.957085		0.748927	0.240094	0.0109791	#40-		FELDSPAR		0.7
412	49.46	0.09	31.85	0.12	0.43	14.4	2.72	0.17		99.24		2.25949	1.71483	0.0240687	0.00464327		0.00309186	0.0292807	4.03541		0.704818	0.24092	0.0099075	0.955645		0.737531	0.252102	0.0103673	#41-		FELDSPAR		0.63
422.3	49.29	0.16	31.92	0.12	0.36	14.23	2.8	0.2		99.08		2.25479	1.72094	0.0260143	0.00464959		0.00550413	0.0245474	4.03645		0.697445	0.248343	0.0116718	0.95746		0.728433	0.259377	0.0121903	#43-		FELDSPAR		0.68
432.6	49.79	0.07	31.77	0	0.43	14.18	2.81	0.22		99.27		2.2714	1.70814	0.0247982	0		0.00240143	0.0292398	4.03598		0.693082	0.248544	0.0128036	0.95443		0.726174	0.260411	0.0134149	#44-		FELDSPAR		0.65
442.9	49.61	0.3	31.92	0	0.33	14.2	2.66	0.18		99.2		2.26396	1.71679	0.024425	0		0.0102954	0.0224476	4.03792		0.694297	0.235357	0.0104793	0.940134		0.738509	0.250345	0.0111466	#45-		FELDSPAR		0.64
453.2	49.54	0.07	31.58	0	0.26	14.75	2.72	0.19		99.11		2.26723	1.70336	0.0256431	0		0.00240912	0.0177365	4.01638		0.723251	0.241354	0.0110931	0.975699		0.741265	0.247366	0.0113694	#46-		FELDSPAR		0.67
463.5	49.51	0.22	31.78	0.05	0.4	14.24	2.65	0.23		99.08		2.26242	1.71155	0.027515	0.00193525		0.00756004	0.0272456	4.03823		0.697186	0.234787	0.0134081	0.945381		0.737466	0.248352	0.0141828	#47-		FELDSPAR		0.72
473.8	49.62	0.17	31.66	0.16	0.27	14.29	2.69	0.23		99.09		2.26848	1.70586	0.0259981	0.0061956		0.0058445	0.0183991	4.03078		0.69995	0.238439	0.0134142	0.951803		0.735394	0.250512	0.0140934	#48-		FELDSPAR		0.68
484.1	50.73	0.28	30.83	0.11	0.32	13.43	3.14	0.18		99.02		2.31262	1.65641	0.0285927	0.00424734		0.00959881	0.0217442	4.03321		0.655952	0.277533	0.0104681	0.943954		0.694899	0.294012	0.0110897	#49-		FELDSPAR		0.75
494.4	50.39	0.16	30.91	0.2	0.34	13.77	3.14	0.21		99.12		2.30012	1.66288	0.0274849	0.00773253		0.0054922	0.0231335	4.02684		0.673438	0.277896	0.0122288	0.963563		0.698904	0.288405	0.0126912	#50-		FELDSPAR		0.72
504.7	50.21	0.22	31.2	0.14	0.35	13.74	2.97	0.24		99.07		2.29235	1.6788	0.0263448	0.00541382		0.00755324	0.0238185	4.03428		0.6721	0.262902	0.0139785	0.94898		0.708234	0.277036	0.01473	#51-		FELDSPAR		0.69
515	50.12	0.22	31.24	0.19	0.43	13.81	2.83	0.24		99.08		2.28643	1.67963	0.0301391	0.00734153		0.00754729	0.0292396	4.04033		0.674992	0.250311	0.0139675	0.939271		0.718634	0.266495	0.0148705	#52-		FELDSPAR		0.79
525.3	50.02	0.24	31.27	0.07	0.45	13.84	2.92	0.23		99.04		2.28417	1.68294	0.0286419	0.0027075		0.00824171	0.0306305	4.03733		0.677141	0.258532	0.013399	0.949072		0.713477	0.272405	0.014118	#53-		FELDSPAR		0.75
535.6	49.75	0.14	31.42	0.17	0.37	13.94	2.85	0.31		98.95		2.27462	1.69308	0.0321182	0.00658341		0.00481355	0.0252159	4.03644		0.682868	0.252644	0.0180816	0.953593		0.7161	0.264938	0.0189615	#54-		FELDSPAR		0.84
545.9	49.56	0.11	31.33	0.06	0.35	14.46	2.8	0.2		98.87		2.27231	1.69298	0.0268405	0.0023301		0.00379271	0.02392	4.02218		0.710334	0.24891	0.0116984	0.970942		0.731593	0.256359	0.0120485	#55-		FELDSPAR		0.7
556.2	49.48	0.24	31.33	0.15	0.46	14.17	3.1	0.28		99.21		2.26401	1.68952	0.0271683	0.00581333		0.00825809	0.0313734	4.02614		0.694665	0.275015	0.0163442	0.986024		0.704511	0.278913	0.0165759	#56-		FELDSPAR		0.71
566.5	51.23	0.19	30.57	0.07	0.33	13.01	3.33	0.32		99.05		2.33318	1.64087	0.0278037	0.00270028		0.00650727	0.0224024	4.03347		0.634833	0.294046	0.0185923	0.947471		0.670029	0.310348	0.0196231	#57-		FELDSPAR		0.73
576.8	51.71	0.2	30.09	0.09	0.24	12.72	3.74	0.34		99.13		2.35347	1.61403	0.0277852	0.00346947		0.00684519	0.0162818	4.02189		0.620268	0.33003	0.0197411	0.970039		0.639426	0.340223	0.0203509	#58-		FELDSPAR		0.73
587.1	51.95	0.17	30.1	0.06	0.27	12.6	3.76	0.3		99.21		2.36256	1.61332	0.0220588	0.00231119		0.0058139	0.0183028	4.02437		0.61394	0.331537	0.0174051	0.962883		0.637606	0.344318	0.0180761	#59-		FELDSPAR		0.58
597.4	50.99	0.17	30.79	0.09	0.22	13.23	3.3	0.24		99.03		2.32147	1.65213	0.0327441	0.00347062		0.00582034	0.0149299	4.03057		0.645351	0.291299	0.0139395	0.95059		0.678895	0.306441	0.0146641	#60-		FELDSPAR		0.86
607.7	52.13	0.16	29.95	0.05	0.36	12.65	3.72	0.26		99.28		2.36549	1.60172	0.0280815	0.00192171		0.00545976	0.0243496	4.02702		0.615009	0.327283	0.015051	0.957342		0.642413	0.341866	0.0157216	#61-		FELDSPAR		0.74
618	51.57	0.23	30.14	0.08	0.29	12.59	3.84	0.38		99.12		2.34695	1.61661	0.0312087	0.00308377		0.00787145	0.0196725	4.02539		0.613889	0.338832	0.0220622	0.974783		0.62977	0.347597	0.0226329	#62-		FELDSPAR		0.82

## Sheet: KONE 1-Pl2
Dist from core	SiO2	TiO2	Al2O3	MnO	MgO	CaO	Na2O	K2O		Total		Si	Al	Fe3	Mn3		Ti	Mg	su1		Ca	Na	K	su2	Compositions	ANORTHITE	HIGH ALBITE	POTASSIUM FELDSPAR	end				FeO
0	50.14	0.23	31.2	0.18	0.3	13.29	3.37	0.29		99		2.2898	1.6793	0.0313	0.007		0.0079	0.0204	4.0356		0.6503	0.2984	0.0169	0.9656		0.6735	0.309	0.0175	#1-		FELDSPAR		0.82
8	50.26	0.08	31.62	0	0.26	13.96	2.95	0.22		100.01		2.2883	1.6967	0.0251	0		0.0027	0.0176	4.0305		0.681	0.2604	0.0128	0.9542		0.7137	0.2729	0.0134	#3-		FELDSPAR		0.66
16	51.92	0.13	30.26	0	0.32	12.67	3.74	0.24		100.01		2.3591	1.6205	0.0213	0		0.0044	0.0217	4.027		0.6168	0.3295	0.0139	0.9602		0.6424	0.3431	0.0145	#4-		FELDSPAR		0.56
24	50.55	0.17	30.9	0.2	0.3	13.6	3.19	0.28		100		2.3052	1.6607	0.0275	0.0077		0.0058	0.0204	4.0274		0.6645	0.282	0.0163	0.9628		0.6901	0.2929	0.0169	#5-		FELDSPAR		0.72
32	50.04	0.16	31.28	0.23	0.39	13.86	2.97	0.25		100		2.2866	1.6846	0.021	0.0089		0.0055	0.0266	4.0332		0.6786	0.2631	0.0146	0.9563		0.7096	0.2752	0.0152	#6-		FELDSPAR		0.55
40	50.39	0.14	30.98	0.1	0.32	13.91	3.15	0.23		100		2.3002	1.6667	0.024	0.0039		0.0048	0.0218	4.0213		0.6803	0.2788	0.0134	0.9725		0.6996	0.2867	0.0138	#7-		FELDSPAR		0.63
48	51.28	0.28	30.93	0.16	0.29	12.45	3.42	0.21		100.01		2.3314	1.6573	0.0266	0.0062		0.0096	0.0197	4.0507		0.6065	0.3015	0.0122	0.9201		0.6591	0.3276	0.0132	#8-		FELDSPAR		0.7
56	51.6	0.16	30.19	0.19	0.29	12.64	3.93	0.21		99.99		2.3474	1.6187	0.0266	0.0073		0.0055	0.0197	4.0252		0.6161	0.3466	0.0122	0.9749		0.6319	0.3556	0.0125	#10-		FELDSPAR		0.7
64	50.11	0.37	31.01	0.23	0.35	13.7	3.17	0.24		100		2.2889	1.6694	0.0252	0.0089		0.0127	0.0238	4.0289		0.6705	0.2807	0.014	0.9652		0.6946	0.2909	0.0145	#12-		FELDSPAR		0.66
72	50.14	0.23	31.14	0.17	0.27	13.9	2.94	0.24		99.99		2.2905	1.6766	0.0283	0.0066		0.0079	0.0184	4.0283		0.6803	0.2604	0.014	0.9547		0.7126	0.2728	0.0147	#13-		FELDSPAR		0.74
80	50.43	0.15	31.19	0.13	0.36	13.7	2.97	0.23		100.01		2.2997	1.6763	0.0244	0.005		0.0051	0.0245	4.035		0.6694	0.2626	0.0134	0.9453		0.7081	0.2778	0.0142	#14-		FELDSPAR		0.64
88	51.12	0.16	30.47	0.13	0.31	13.22	3.47	0.18		99.99		2.3288	1.636	0.0301	0.005		0.0055	0.0211	4.0264		0.6453	0.3065	0.0105	0.9622		0.6706	0.3185	0.0109	#15-		FELDSPAR		0.79
96	49.98	0.23	31.28	0.21	0.32	13.99	2.98	0.28		100.01		2.2814	1.6828	0.026	0.0081		0.0079	0.0218	4.028		0.6842	0.2637	0.0163	0.9643		0.7096	0.2735	0.0169	#16-		FELDSPAR		0.68
104	51.69	0.24	29.74	0.27	0.45	12.65	3.89	0.27		100		2.3531	1.5957	0.0274	0.0104		0.0082	0.0305	4.0254		0.617	0.3434	0.0157	0.976		0.6322	0.3518	0.0161	#17-		FELDSPAR		0.72
112	50.16	0.15	31.37	0.16	0.27	13.72	3.07	0.19		99.98		2.2883	1.6867	0.029	0.0062		0.0051	0.0184	4.0337		0.6706	0.2715	0.0111	0.9532		0.7035	0.2849	0.0116	#18-		FELDSPAR		0.76
120	49.91	0.32	31.28	0.26	0.22	13.81	3.08	0.21		100		2.2786	1.6831	0.0321	0.0101		0.011	0.015	4.0298		0.6755	0.2726	0.0122	0.9604		0.7034	0.2839	0.0127	#19-		FELDSPAR		0.84
128	49.79	0.25	31.03	0.18	0.38	13.83	3.17	0.24		100		2.2796	1.6744	0.0329	0.007		0.0086	0.0259	4.0285		0.6784	0.2814	0.014	0.9738		0.6966	0.289	0.0144	#20-		FELDSPAR		0.86
136	50.45	0.21	30.87	0.12	0.35	13.76	3.01	0.27		100		2.304	1.6615	0.0267	0.0046		0.0072	0.0238	4.0279		0.6733	0.2665	0.0157	0.9555		0.7046	0.2789	0.0165	#21-		FELDSPAR		0.7
144	49.96	0.18	31.51	0.11	0.26	13.67	3.24	0.18		100.01		2.2811	1.6956	0.0271	0.0043		0.0062	0.0177	4.0319		0.6687	0.2868	0.0105	0.966		0.6922	0.2969	0.0109	#22-		FELDSPAR		0.71
152	50.03	0.25	31.34	0.25	0.42	13.51	3.12	0.23		100		2.2836	1.6859	0.0256	0.0097		0.0086	0.0286	4.0419		0.6607	0.2761	0.0134	0.9502		0.6953	0.2906	0.0141	#23-		FELDSPAR		0.67
160	50.29	0.13	31.29	0.15	0.26	13.71	3.11	0.24		99.99		2.2945	1.6825	0.0248	0.0058		0.0045	0.0177	4.0298		0.6702	0.2751	0.014	0.9593		0.6986	0.2868	0.0146	#24-		FELDSPAR		0.65
168	49.87	0.25	31.38	0.2	0.29	13.84	3.02	0.22		100		2.2791	1.6902	0.0268	0.0077		0.0086	0.0198	4.0321		0.6777	0.2676	0.0128	0.9581		0.7073	0.2793	0.0134	#25-		FELDSPAR		0.7
176	49.88	0.22	31.35	0.16	0.42	13.73	3.19	0.26		99.99		2.2787	1.688	0.0245	0.0062		0.0076	0.0286	4.0335		0.672	0.2826	0.0152	0.9698		0.693	0.2914	0.0156	#26-		FELDSPAR		0.64
184	50.43	0.25	31.1	0.19	0.25	13.92	2.9	0.23		100.01		2.2986	1.6706	0.0248	0.0073		0.0086	0.017	4.0269		0.6798	0.2563	0.0134	0.9494		0.716	0.2699	0.0141	#27-		FELDSPAR		0.65
192	50.29	0.14	31.18	0.18	0.37	13.59	3.16	0.29		99.99		2.2945	1.6766	0.0256	0.007		0.0048	0.0252	4.0336		0.6643	0.2795	0.0169	0.9607		0.6915	0.291	0.0176	#29-		FELDSPAR		0.67
200	49.79	0.16	31.86	0.14	0.17	14.23	2.87	0.13		100.01		2.2694	1.7115	0.0252	0.0054		0.0055	0.0115	4.0285		0.6949	0.2536	0.0076	0.9561		0.7268	0.2653	0.0079	#30-		FELDSPAR		0.66
208	51.58	0.17	30.25	0.14	0.43	12.74	3.69	0.29		99.99		2.3459	1.6214	0.0236	0.0054		0.0058	0.0292	4.0312		0.6208	0.3254	0.0168	0.963		0.6446	0.3379	0.0175	#31-		FELDSPAR		0.62
216	51.83	0.25	30.37	0.23	0.21	12.64	3.58	0.22		100.01		2.3536	1.6254	0.0209	0.0088		0.0085	0.0142	4.0314		0.615	0.3152	0.0127	0.9429		0.6522	0.3343	0.0135	#32-		FELDSPAR		0.55
224	50.88	0.22	31.14	0	0.35	13.23	3.25	0.19		100.01		2.3144	1.6694	0.0232	0		0.0075	0.0237	4.0382		0.6448	0.2866	0.011	0.9424		0.6842	0.3041	0.0117	#33-		FELDSPAR		0.61
232	51.07	0.1	30.98	0.11	0.39	13.24	3.14	0.21		100.01		2.3222	1.6603	0.024	0.0042		0.0034	0.0264	4.0406		0.645	0.2768	0.0122	0.9341		0.6906	0.2964	0.013	#34-		FELDSPAR		0.63
240	50.47	0.21	30.88	0.13	0.49	13.33	3.18	0.28		100		2.3042	1.6616	0.0286	0.005		0.0072	0.0333	4.04		0.652	0.2815	0.0163	0.9498		0.6865	0.2964	0.0172	#35-		FELDSPAR		0.75
248	50.16	0.19	31.16	0.07	0.32	13.86	3.05	0.25		99.98		2.2912	1.6775	0.0279	0.0027		0.0065	0.0218	4.0276		0.6783	0.2701	0.0146	0.963		0.7044	0.2805	0.0151	#36-		FELDSPAR		0.73
256	50.27	0.24	31.08	0.06	0.31	13.95	3.02	0.18		100.01		2.2956	1.6727	0.0248	0.0023		0.0082	0.0211	4.0248		0.6825	0.2674	0.0105	0.9604		0.7107	0.2784	0.0109	#37-		FELDSPAR		0.65
264	49.44	0.23	31.76	0.13	0.22	14.47	2.64	0.2		100		2.2616	1.7123	0.0252	0.005		0.0079	0.015	4.0271		0.7092	0.2341	0.0117	0.955		0.7426	0.2452	0.0122	#38-		FELDSPAR		0.66
272	50.22	0.19	30.61	0.26	0.33	13.86	3.21	0.3		100		2.2967	1.6498	0.034	0.0101		0.0065	0.0225	4.0196		0.6791	0.2846	0.0175	0.9812		0.6921	0.2901	0.0178	#39-		FELDSPAR		0.89
280	50.44	0.18	31.03	0.04	0.42	13.71	3.05	0.3		99.99		2.2986	1.6666	0.0313	0.0015		0.0062	0.0285	4.0327		0.6694	0.2695	0.0174	0.9563		0.7	0.2818	0.0182	#40-		FELDSPAR		0.82

## Sheet: KONE 1-Pl3
Dist from core	SiO2	TiO2	Al2O3	MnO	MgO	CaO	Na2O	K2O		Total		Si	Al	Fe3	Mn3	Ti	Mg	su1			Ca	Na	K	su2	Compositions	ANORTHITE	HIGH ALBITE	POTASSIUM FELDSPAR	end				FeO
0	49.54	0.16	32.01	0.14	0.28	14.19	2.65	0.24		100		2.26	1.72	0.02	0.01	0.01	0.02	4.04			0.69	0.23	0.01	0.94		0.74	0.25	0.01	#1-		FELDSPAR		0.6
7	49.69	0.17	31.91	0.16	0.35	14.14	2.58	0.2		99.99		2.27	1.72	0.02	0.01	0.01	0.02	4.04			0.69	0.23	0.01	0.93		0.74	0.25	0.01	#2-		FELDSPAR		0.62
14	49.3	0.24	31.91	0.16	0.26	14.21	2.72	0.26		100.01		2.25	1.72	0.03	0.01	0.01	0.02	4.04			0.7	0.24	0.02	0.95		0.73	0.25	0.02	#3-		FELDSPAR		0.76
21	49.23	0.18	32.19	0.15	0.34	14.31	2.68	0.16		100.01		2.25	1.73	0.03	0.01	0.01	0.02	4.04			0.7	0.24	0.01	0.95		0.74	0.25	0.01	#4-		FELDSPAR		0.69
28	49.29	0.16	31.75	0.16	0.33	14.5	2.77	0.17		100		2.26	1.71	0.03	0.01	0.01	0.02	4.03			0.71	0.25	0.01	0.97		0.74	0.25	0.01	#5-		FELDSPAR		0.7
35	50.35	0.08	31.79	0.05	0.32	13.71	2.86	0.18		100		2.29	1.7	0.02	0	0	0.02	4.04			0.67	0.25	0.01	0.93		0.72	0.27	0.01	#7-		FELDSPAR		0.54
42	50.07	0.2	31.39	0.1	0.34	13.67	3.32	0.2		99.99		2.28	1.69	0.02	0	0.01	0.02	4.03			0.67	0.29	0.01	0.97		0.69	0.3	0.01	#8-		FELDSPAR		0.65
49	50.1	0.21	31.41	0.23	0.32	13.78	2.98	0.17		100		2.29	1.69	0.02	0.01	0.01	0.02	4.04			0.67	0.26	0.01	0.95		0.71	0.28	0.01	#9-		FELDSPAR		0.64
56	50.16	0.17	31.63	0.14	0.23	13.6	3.03	0.21		100		2.29	1.7	0.03	0.01	0.01	0.02	4.04			0.66	0.27	0.01	0.94		0.7	0.28	0.01	#10-		FELDSPAR		0.74
63	48.85	0.17	32.17	0.11	0.43	14.69	2.48	0.19		100		2.24	1.74	0.03	0	0.01	0.03	4.04			0.72	0.22	0.01	0.95		0.76	0.23	0.01	#11-		FELDSPAR		0.68
70	50.17	0.16	31.82	0	0.26	13.83	2.82	0.23		100		2.28	1.71	0.02	0	0.01	0.02	4.04			0.67	0.25	0.01	0.94		0.72	0.27	0.01	#12-		FELDSPAR		0.62
77	49.82	0.2	31.82	0.15	0.24	13.62	3.02	0.26		100		2.27	1.71	0.03	0.01	0.01	0.02	4.04			0.67	0.27	0.02	0.95		0.7	0.28	0.02	#13-		FELDSPAR		0.71
84	49.72	0.24	31.61	0.08	0.42	14	2.91	0.24		100		2.27	1.7	0.02	0	0.01	0.03	4.04			0.68	0.26	0.01	0.96		0.72	0.27	0.01	#14-		FELDSPAR		0.65
91	50.34	0.26	31.5	0.17	0.29	13.52	3.04	0.23		100.01		2.29	1.69	0.03	0.01	0.01	0.02	4.04			0.66	0.27	0.01	0.94		0.7	0.29	0.01	#15-		FELDSPAR		0.66
98	49.97	0.17	31.61	0.14	0.29	13.79	2.96	0.22		100		2.28	1.7	0.03	0.01	0.01	0.02	4.04			0.67	0.26	0.01	0.95		0.71	0.28	0.01	#16-		FELDSPAR		0.67
105	50.43	0.16	31.34	0.11	0.46	13.34	3.16	0.27		100.01		2.3	1.68	0.02	0	0.01	0.03	4.04			0.65	0.28	0.02	0.95		0.69	0.3	0.02	#17-		FELDSPAR		0.58
112	50.55	0.16	31.25	0.12	0.34	13.35	3.34	0.21		100		2.3	1.68	0.02	0	0.01	0.02	4.03			0.65	0.3	0.01	0.96		0.68	0.31	0.01	#18-		FELDSPAR		0.53
119	50.54	0.07	31.37	0.05	0.44	13.42	3.22	0.15		100.02		2.3	1.68	0.02	0	0	0.03	4.04			0.65	0.28	0.01	0.95		0.69	0.3	0.01	#19-		FELDSPAR		0.62
126	50.94	0.2	30.9	0.12	0.47	13.12	3.32	0.2		99.99		2.32	1.66	0.02	0	0.01	0.03	4.04			0.64	0.29	0.01	0.94		0.68	0.31	0.01	#20-		FELDSPAR		0.62
133	51.19	0.27	30.66	0.19	0.37	12.51	3.75	0.22		100		2.33	1.64	0.02	0.01	0.01	0.03	4.04			0.61	0.33	0.01	0.95		0.64	0.35	0.01	#21-		FELDSPAR		0.63
140	50.61	0.21	31.29	0.09	0.31	13.24	3.17	0.27		100		2.3	1.68	0.02	0	0.01	0.02	4.04			0.65	0.28	0.02	0.94		0.69	0.3	0.02	#22-		FELDSPAR		0.65
147	50.75	0.25	30.96	0.14	0.42	13.24	3.28	0.22		100		2.31	1.66	0.02	0.01	0.01	0.03	4.04			0.65	0.29	0.01	0.95		0.68	0.31	0.01	#23-		FELDSPAR		0.62
154	50.76	0.16	31.11	0.11	0.36	13.34	3.2	0.24		100.01		2.31	1.67	0.02	0	0.01	0.02	4.04			0.65	0.28	0.01	0.95		0.69	0.3	0.01	#24-		FELDSPAR		0.63
161	50.86	0.14	31.06	0.08	0.34	13.25	3.34	0.17		99.99		2.32	1.67	0.02	0	0	0.02	4.04			0.65	0.29	0.01	0.95		0.68	0.31	0.01	#25-		FELDSPAR		0.6
168	50.73	0.29	30.75	0.2	0.33	13.15	3.44	0.23		99.99		2.31	1.65	0.03	0.01	0.01	0.02	4.03			0.64	0.3	0.01	0.96		0.67	0.32	0.01	#26-		FELDSPAR		0.68
175	50.51	0.25	31.15	0.19	0.42	13.22	3.16	0.24		100.01		2.3	1.67	0.03	0.01	0.01	0.03	4.05			0.65	0.28	0.01	0.94		0.69	0.3	0.01	#27-		FELDSPAR		0.71
182	50.98	0.12	31.37	0.18	0.22	13.14	3.12	0.22		100		2.32	1.68	0.02	0.01	0	0.01	4.04			0.64	0.27	0.01	0.93		0.69	0.3	0.01	#28-		FELDSPAR		0.59
189	51.01	0.06	30.87	0.11	0.3	13.3	3.31	0.28		100.01		2.32	1.66	0.02	0	0	0.02	4.03			0.65	0.29	0.02	0.96		0.68	0.31	0.02	#29-		FELDSPAR		0.61
196	50.91	0.25	30.93	0.14	0.31	13.26	3.17	0.21		100		2.32	1.66	0.02	0.01	0.01	0.02	4.04			0.65	0.28	0.01	0.94		0.69	0.3	0.01	#30-		FELDSPAR		0.61
203	50.89	0.22	30.56	0.22	0.32	12.9	3.62	0.28		99.99		2.32	1.64	0.03	0.01	0.01	0.02	4.03			0.63	0.32	0.02	0.97		0.65	0.33	0.02	#31-		FELDSPAR		0.76
210	51.05	0.15	30.85	0.06	0.45	13.03	3.46	0.24		100		2.32	1.65	0.02	0	0.01	0.03	4.04			0.64	0.31	0.01	0.95		0.67	0.32	0.01	#32-		FELDSPAR		0.61
217	51.01	0.17	31.04	0.11	0.29	13.29	3.28	0.18		99.99		2.32	1.66	0.02	0	0.01	0.02	4.03			0.65	0.29	0.01	0.95		0.68	0.31	0.01	#33-		FELDSPAR		0.62
224	51.17	0.15	30.8	0.07	0.2	13.27	3.29	0.21		99.98		2.33	1.65	0.02	0	0.01	0.01	4.03			0.65	0.29	0.01	0.95		0.68	0.31	0.01	#34-		FELDSPAR		0.61
231	50.62	0.19	30.91	0.21	0.39	13.18	3.28	0.27		100.01		2.31	1.66	0.03	0.01	0.01	0.03	4.04			0.64	0.29	0.02	0.95		0.68	0.31	0.02	#35-		FELDSPAR		0.71
238	50.32	0.19	31.24	0.1	0.35	13.77	3.21	0.19		99.99		2.29	1.68	0.02	0	0.01	0.02	4.03			0.67	0.28	0.01	0.97		0.7	0.29	0.01	#36-		FELDSPAR		0.62
245	50.74	0.07	31.24	0.12	0.32	13.26	3.24	0.19		99.99		2.31	1.68	0.03	0	0	0.02	4.04			0.65	0.29	0.01	0.94		0.69	0.3	0.01	#37-		FELDSPAR		0.66
252	50.85	0.15	31.24	0.07	0.32	13.32	3.19	0.19		100		2.31	1.67	0.03	0	0.01	0.02	4.04			0.65	0.28	0.01	0.94		0.69	0.3	0.01	#38-		FELDSPAR		0.67
259	49.35	0.23	31.74	0.15	0.35	14.02	2.85	0.26		99.99		2.26	1.71	0.03	0.01	0.01	0.02	4.04			0.69	0.25	0.02	0.95		0.72	0.26	0.02	#39-		FELDSPAR		0.89
266	49.81	0.21	31.36	0.11	0.38	14.08	2.91	0.21		99.99		2.28	1.69	0.03	0	0.01	0.03	4.03			0.69	0.26	0.01	0.96		0.72	0.27	0.01	#40-		FELDSPAR		0.7
273	49.27	0.26	31.51	0.17	0.44	14.08	2.89	0.29		100		2.26	1.7	0.03	0.01	0.01	0.03	4.04			0.69	0.26	0.02	0.96		0.72	0.27	0.02	#41-		FELDSPAR		0.83
280	49.56	0.26	31.25	0.17	0.36	14.03	3.02	0.26		100.01		2.27	1.68	0.04	0.01	0.01	0.02	4.03			0.69	0.27	0.02	0.97		0.71	0.28	0.02	#42-		FELDSPAR		0.99
287	49.49	0.25	31.63	0.22	0.42	14.03	2.77	0.18		99.99		2.26	1.7	0.03	0.01	0.01	0.03	4.04			0.69	0.25	0.01	0.94		0.73	0.26	0.01	#43-		FELDSPAR		0.84
294	50.63	0.12	31.05	0.1	0.36	13.59	3.15	0.13		100		2.31	1.67	0.03	0	0	0.02	4.03			0.66	0.28	0.01	0.95		0.7	0.29	0.01	#44-		FELDSPAR		0.8
301	51.18	0.18	29.93	0.13	0.56	12.51	3.68	0.36		100		2.34	1.61	0.05	0.01	0.01	0.04	4.04			0.61	0.33	0.02	0.96		0.64	0.34	0.02	#46-		FELDSPAR		1.22

## Sheet: KB3-Pl1
Dist from core	SiO2	TiO2	Al2O3	MnO	MgO	CaO	Na2O	K2O	Total		Si	Al	Fe3	Mn3		Ti	Mg	su1		Ca	Na	K	su2	Compositions	ANORTHITE	HIGH ALBITE	POTASSIUM FELDSPAR	end				FeO
0	51.03	0.17	30.53	0.12	0.22	13.7	3.06	0.28	99.11		2.32522	1.63953	0.0297227	0.00463132		0.00582516	0.0149423	4.01987		0.668831	0.270338	0.0162763	0.955445		0.700021	0.282944	0.0170353	#1-		FELDSPAR		0.78
11.6	50.56	0.16	30.86	0.09	0.35	13.67	3.24	0.23	99.16		2.30601	1.65885	0.0278441	0.00347682		0.00548776	0.0237946	4.02546		0.668006	0.286514	0.0133826	0.967903		0.690158	0.296015	0.0138264	#2-		FELDSPAR		0.73
23.2	50.08	0.29	30.91	0.19	0.4	14.02	2.85	0.27	99.01		2.29002	1.66583	0.0279161	0.00735893		0.00997227	0.0272641	4.02836		0.68688	0.252678	0.0157506	0.955308		0.719014	0.264499	0.0164875	#3-		FELDSPAR		0.73
34.8	49.98	0.28	30.96	0.17	0.39	13.92	3.08	0.29	99.07		2.28579	1.66877	0.0283027	0.00658528		0.00962982	0.0265864	4.02566		0.682082	0.27311	0.0169198	0.972111		0.70165	0.280945	0.0174052	#4-		FELDSPAR		0.74
46.4	49.61	0.19	31.52	0.06	0.4	14.28	2.82	0.26	99.14		2.26963	1.69952	0.0233384	0.002325		0.00653672	0.0272773	4.02863		0.699957	0.250139	0.0151746	0.96527		0.725141	0.259139	0.0157206	#5-		FELDSPAR		0.61
58	50.5	0.2	30.56	0.19	0.4	13.69	3.23	0.26	99.03		2.30633	1.6449	0.0317004	0.0073497		0.0068688	0.0272299	4.02438		0.669871	0.286009	0.0151482	0.971028		0.689857	0.294542	0.0156002	#6-		FELDSPAR		0.83
69.6	50.13	0.08	30.98	0.09	0.47	13.8	3.33	0.27	99.15		2.29048	1.66827	0.028658	0.00348302		0.00274877	0.0320097	4.02564		0.675561	0.294998	0.015738	0.986298		0.684947	0.299096	0.0159567	#7-		FELDSPAR		0.75
81.2	49.52	0.2	31.49	0.18	0.41	14.3	2.76	0.21	99.07		2.26462	1.69724	0.0290659	0.00697224		0.00687804	0.0279482	4.03272		0.700661	0.24472	0.0122516	0.957633		0.731659	0.255547	0.0127936	#8-		FELDSPAR		0.76
92.8	49.54	0.26	30.98	0.18	0.38	14.53	2.85	0.26	98.98		2.26991	1.67298	0.0325708	0.00698572		0.00895875	0.0259533	4.01736		0.713307	0.253189	0.015198	0.981694		0.726608	0.25791	0.0154814	#9-		FELDSPAR		0.85
104.4	49.76	0.16	31.14	0.14	0.4	14.33	2.85	0.25	99.03		2.27715	1.67952	0.0290858	0.00542657		0.0055062	0.0272852	4.02398		0.702612	0.252873	0.0145952	0.97008		0.724282	0.260673	0.0150454	#10-		FELDSPAR		0.76
116	49.64	0.2	31.28	0.18	0.36	14.18	2.87	0.27	98.98		2.2711	1.68666	0.0325221	0.00697529		0.00688106	0.0245506	4.02869		0.695085	0.254585	0.0157589	0.965429		0.719975	0.263701	0.0163232	#11-		FELDSPAR		0.85
127.6	50.11	0.16	31.07	0.17	0.41	14.16	2.96	0.25	99.29		2.28871	1.67249	0.0225359	0.0065766		0.0054955	0.027913	4.02372		0.692927	0.262123	0.0145668	0.969617		0.71464	0.270337	0.0150233	#12-		FELDSPAR		0.59
139.2	49.4	0.27	31.23	0.19	0.4	14.35	2.86	0.34	99.04		2.26432	1.68709	0.0279827	0.00737649		0.00930668	0.0273291	4.0234		0.704725	0.254169	0.0198814	0.978776		0.720007	0.259681	0.0203125	#13-		FELDSPAR		0.73
150.8	49.58	0.16	31.49	0.11	0.29	14.3	2.91	0.25	99.09		2.26768	1.69748	0.0294525	0.00426141		0.00550321	0.019771	4.02414		0.700759	0.258057	0.0145873	0.973403		0.719907	0.265108	0.0149858	#14-		FELDSPAR		0.77
162.4	49.72	0.19	31.39	0	0.39	14.44	2.82	0.22	99.17		2.27538	1.69305	0.0202841	0		0.00653879	0.0266038	4.02186		0.708024	0.250218	0.0128441	0.971086		0.729105	0.257668	0.0132265	#15-		FELDSPAR		0.53
174	50.04	0.21	31.15	0.16	0.38	13.82	3.03	0.25	99.04		2.28537	1.67669	0.031319	0.00618934		0.00721238	0.0258689	4.03264		0.676245	0.268304	0.0145659	0.959115		0.705072	0.279742	0.0151868	#16-		FELDSPAR		0.82
185.6	49.84	0.24	31.14	0.24	0.33	14.05	2.94	0.28	99.06		2.28053	1.67932	0.0264036	0.00930154		0.00825829	0.0225075	4.02632		0.688798	0.260827	0.0163446	0.965969		0.713064	0.270016	0.0169204	#17-		FELDSPAR		0.69
197.2	50.12	0.09	31.29	0.1	0.36	14.19	2.67	0.25	99.07		2.28961	1.68465	0.0248324	0.00386933		0.00309181	0.0245136	4.03057		0.694528	0.236487	0.0145696	0.945585		0.734496	0.250096	0.0154081	#18-		FELDSPAR		0.65
208.8	49.72	0.18	31.12	0.1	0.43	14.5	2.75	0.23	99.03		2.27655	1.67935	0.026804	0.00387821		0.00619782	0.0293474	4.02212		0.71133	0.244132	0.0134348	0.968897		0.734165	0.251969	0.0138661	#19-		FELDSPAR		0.7
220.4	49.68	0.2	31.46	0.18	0.24	14.42	2.76	0.24	99.18		2.27098	1.69491	0.0263777	0.00696932		0.00687516	0.0163531	4.02247		0.706244	0.244618	0.0139959	0.964858		0.731967	0.253527	0.0145057	#20-		FELDSPAR		0.69
232	49.75	0.23	31.27	0.28	0.35	14.03	2.94	0.24	99.09		2.27389	1.68446	0.0301967	0.0108398		0.00790542	0.0238452	4.03114		0.687055	0.260538	0.0139941	0.961587		0.714501	0.270945	0.0145532	#21-		FELDSPAR		0.79
243.6	49.74	0.22	31.33	0.19	0.47	13.99	3.01	0.24	99.19		2.27347	1.68771	0.025228	0.00735567		0.00756182	0.0320211	4.03335		0.685107	0.266745	0.0139943	0.965846		0.709333	0.276178	0.0144892	#22-		FELDSPAR		0.66
255.2	50.65	0.19	30.78	0.04	0.39	13.59	3.23	0.3	99.17		2.31073	1.65498	0.0255623	0.00154566		0.00651844	0.026521	4.02586		0.664272	0.285705	0.0174602	0.967438		0.68663	0.295322	0.0180479	#24-		FELDSPAR		0.67
266.8	50.26	0.23	30.82	0.12	0.33	13.89	3.18	0.29	99.12		2.29696	1.66005	0.0275182	0.00464514		0.0079046	0.0224803	4.01956		0.680129	0.281777	0.0169078	0.978814		0.69485	0.287876	0.0172738	#25-		FELDSPAR		0.72
278.4	50.64	0.22	30.89	0.07	0.3	13.65	2.99	0.25	99.01		2.3093	1.6602	0.0301279	0.00270377		0.00754449	0.0203922	4.03026		0.666924	0.264365	0.014544	0.945834		0.705118	0.279505	0.0153769	#26-		FELDSPAR		0.79
290	50.46	0.25	30.59	0.1	0.4	13.67	3.14	0.32	98.93		2.3058	1.64744	0.0328647	0.00387045		0.00859085	0.0272453	4.02582		0.66927	0.278197	0.0186545	0.966121		0.692739	0.287952	0.0193087	#27-		FELDSPAR		0.86
301.6	50.05	0.22	30.88	0.13	0.33	14.22	3.01	0.29	99.13		2.28969	1.66497	0.0260158	0.00503734		0.00756861	0.0225031	4.01578		0.696995	0.266984	0.016925	0.980905		0.710564	0.272182	0.0172545	#28-		FELDSPAR		0.68
313.2	49.54	0.28	31.36	0.2	0.41	14.13	2.79	0.26	98.97		2.26686	1.69122	0.0309963	0.00775148		0.00963491	0.0279646	4.03443		0.692737	0.247525	0.0151775	0.95544		0.725045	0.25907	0.0158854	#29-		FELDSPAR		0.81
324.8	50.66	0.27	30.62	0.17	0.44	13.58	3.22	0.29	99.25		2.30877	1.64466	0.0289658	0.00656221		0.00925337	0.0298899	4.0281		0.66309	0.284523	0.0168606	0.964474		0.687515	0.295004	0.0174816	#30-		FELDSPAR		0.76
336.4	50.44	0.28	30.68	0.19	0.39	13.63	3.15	0.28	99.04		2.30401	1.65166	0.0286501	0.00735103		0.00961807	0.026554	4.02784		0.667056	0.278976	0.0163165	0.962349		0.693155	0.289891	0.0169548	#31-		FELDSPAR		0.75
348	50.35	0.32	30.92	0.15	0.27	13.66	3.11	0.29	99.07		2.29925	1.66411	0.0278782	0.00580181		0.010989	0.0183783	4.02641		0.668336	0.275356	0.0168944	0.960586		0.695759	0.286654	0.0175876	#32-		FELDSPAR		0.73
359.6	50.24	0.23	31.06	0.11	0.38	13.87	3.11	0.25	99.25		2.29122	1.66945	0.0286045	0.00424909		0.00788798	0.0258319	4.02725		0.677722	0.274995	0.0145451	0.967261		0.70066	0.284302	0.0150374	#33-		FELDSPAR		0.75
371.2	50.46	0.13	31.13	0.05	0.2	13.91	3.06	0.23	99.17		2.30174	1.67357	0.0259403	0.00193181		0.00445937	0.0135986	4.02125		0.679821	0.270631	0.0133843	0.963836		0.705328	0.280785	0.0138865	#34-		FELDSPAR		0.68
382.8	49.97	0.2	31.12	0.16	0.35	14.07	2.93	0.24	99.04		2.28283	1.67556	0.0324742	0.00619113		0.00687092	0.0238335	4.02776		0.688677	0.259525	0.0139873	0.962189		0.71574	0.269723	0.014537	#35-		FELDSPAR		0.85
394.4	49.88	0.15	31.63	0.12	0.4	14.12	2.72	0.25	99.27		2.27514	1.70034	0.0247942	0.00463605		0.00514509	0.0271955	4.03725		0.690039	0.240545	0.0145472	0.945131		0.730098	0.25451	0.0153917	#36-		FELDSPAR		0.65
406	50.18	0.22	30.88	0.16	0.46	13.93	3.04	0.3	99.17		2.29198	1.66231	0.0278842	0.00618992		0.00755654	0.0313179	4.02724		0.681692	0.269215	0.0174807	0.968388		0.703945	0.278004	0.0180514	#37-		FELDSPAR		0.73
417.6	50	0.21	30.99	0.11	0.32	13.97	2.99	0.28	98.87		2.28959	1.67249	0.0287213	0.00426644		0.00723147	0.021842	4.02414		0.685395	0.265464	0.016357	0.967215		0.708627	0.274462	0.0169114	#38-		FELDSPAR		0.75
429.2	50.08	0.15	30.88	0.08	0.39	14.03	3.09	0.31	99.01		2.29116	1.66504	0.0298429	0.00310003		0.00516063	0.0265957	4.02089		0.687711	0.274092	0.018093	0.979895		0.701821	0.279715	0.0184642	#39-		FELDSPAR		0.78
440.8	49.68	0.22	31.61	0.05	0.38	14.37	2.72	0.3	99.33		2.26924	1.70169	0.0217736	0.00193444		0.00755688	0.0258725	4.02806		0.703256	0.240888	0.0174815	0.961625		0.73132	0.250501	0.0181791	#40-		FELDSPAR		0.57
452.4	50.2	0.11	31.29	0.06	0.23	14.06	3.03	0.26	99.24		2.28951	1.6819	0.0286059	0.0023178		0.0037727	0.0156359	4.02174		0.687039	0.267934	0.0151276	0.970101		0.708214	0.276192	0.0155939	#41-		FELDSPAR		0.75
464	49.45	0.1	31.33	0.15	0.52	14.52	2.92	0.14	99.13		2.2611	1.68838	0.0328858	0.0058094		0.00343855	0.0354416	4.02706		0.711342	0.258871	0.00816659	0.97838		0.727061	0.264592	0.00834705	#42-		FELDSPAR		0.86
475.6	50.14	0.08	30.88	0.11	0.38	14.01	2.85	0.35	98.8		2.29459	1.66554	0.0340618	0.00426383		0.00275316	0.0259215	4.02713		0.686937	0.252879	0.0204337	0.96025		0.715373	0.263347	0.0212796	#43-		FELDSPAR		0.89
487.2	49.9	0.29	31.16	0.13	0.23	14.31	2.86	0.25	99.13		2.28003	1.678	0.0301872	0.00503117		0.00996457	0.0156647	4.01888		0.700546	0.253368	0.0145726	0.968488		0.723341	0.261613	0.0150468	#44-		FELDSPAR		0.79
498.8	49.95	0.24	30.88	0.15	0.5	13.84	3.17	0.32	99.05		2.28428	1.66436	0.031743	0.00581019		0.00825363	0.0340831	4.02852		0.678121	0.281073	0.018669	0.977863		0.693472	0.287436	0.0190917	#45-		FELDSPAR		0.83
510.4	49.33	0.13	31.41	0.17	0.45	14.36	2.91	0.28	99.04		2.25884	1.69511	0.0321669	0.00659338		0.00447649	0.0307144	4.02789		0.704507	0.258353	0.0163565	0.979217		0.71946	0.263836	0.0167036	#46-		FELDSPAR		0.84
522	49.46	0.17	31.43	0.18	0.32	14.42	2.91	0.17	99.06		2.26325	1.69504	0.0306144	0.0069765		0.00584991	0.0218265	4.02356		0.706972	0.258178	0.009924	0.975074		0.725044	0.264778	0.0101777	#47-		FELDSPAR		0.8
533.6	49.71	0.28	31.38	0.19	0.44	13.86	2.86	0.28	99		2.27027	1.68905	0.035138	0.00734975		0.00961639	0.0299531	4.04137		0.678194	0.253248	0.0163136	0.947756		0.715579	0.267208	0.0172129	#48-		FELDSPAR		0.92
545.2	49.74	0.16	31.5	0.16	0.42	14.04	2.88	0.22	99.12		2.27168	1.69554	0.0290275	0.00618937		0.00549517	0.0285921	4.03652		0.687014	0.255023	0.0128181	0.954855		0.719495	0.267081	0.0134241	#49-		FELDSPAR		0.76
556.8	49.69	0.28	31.3	0.22	0.29	14.32	2.72	0.24	99.06		2.27144	1.68629	0.0313474	0.00851805		0.00962522	0.0197599	4.02698		0.701347	0.241073	0.0139959	0.956415		0.733308	0.252059	0.0146337	#50-		FELDSPAR		0.82
568.4	49.84	0.19	31.21	0.14	0.35	14.4	2.83	0.22	99.18		2.27735	1.68074	0.0282774	0.00541833		0.00652869	0.0238383	4.02216		0.704972	0.250718	0.0128243	0.968514		0.72789	0.258868	0.0132412	#51-		FELDSPAR		0.74
580	49.92	0.2	31.42	0.12	0.32	14.14	2.74	0.28	99.14		2.27907	1.69062	0.0282534	0.00464035		0.00686648	0.0217766	4.03123		0.691657	0.242539	0.016308	0.950503		0.727674	0.255169	0.0171572	#52-		FELDSPAR		0.74
591.6	49.52	0.12	31.45	0.15	0.44	14.32	2.71	0.26	98.97		2.26792	1.69755	0.0268103	0.00581868		0.00413285	0.030037	4.03227		0.702665	0.240638	0.0151908	0.958493		0.733093	0.251058	0.0158486	#53-		FELDSPAR		0.7
603.2	50.67	0.24	30.76	0	0.34	13.34	3.35	0.31	99.01		2.31101	1.65346	0.0328024	0		0.00823157	0.0231146	4.02862		0.651875	0.296239	0.0180373	0.966152		0.674713	0.306618	0.0186692	#54-		FELDSPAR		0.86
614.8	50.93	0.23	30.43	0.17	0.39	13.1	3.66	0.36	99.27		2.32106	1.63444	0.0282033	0.00656216		0.00788244	0.0264931	4.02464		0.639648	0.3234	0.0209302	0.983979		0.650063	0.328666	0.021271	#55-		FELDSPAR		0.74

## Sheet: KB3 Pl2
Dist from core	SiO2	TiO2	Al2O3	MnO	MgO	CaO	Na2O	K2O	Total		Si	Al	Fe3	Mn3		Ti	Mg	su1		Ca	Na	K	su2	Compositions	ANORTHITE	HIGH ALBITE	POTASSIUM FELDSPAR	end			FeO
0	49.77	0.27	31.27	0.19	0.47	13.51	3.15	0.3	99.99		2.27611	1.68542	0.0317439	0.00735978		0.00928561	0.032039	4.04196		0.661971	0.279308	0.0175027	0.958781		0.690429	0.291316	0.0182552	#1-		FELDSPAR	0.83
10	50.7	0.19	30.92	0.18	0.25	13.87	2.9	0.22	100.01		2.30928	1.65983	0.0266638	0.00694426		0.00650792	0.0169732	4.02619		0.676865	0.256102	0.0127835	0.94575		0.715691	0.270792	0.0135168	#2-		FELDSPAR	0.7
20	50.21	0.14	31.16	0.07	0.32	13.87	3.1	0.26	100		2.29296	1.6771	0.0263518	0.00270763		0.00480789	0.0217827	4.0257		0.67864	0.274482	0.0151474	0.968269		0.700879	0.283477	0.0156438	#3-		FELDSPAR	0.69
30	50.11	0.2	30.89	0.13	0.34	13.96	3.18	0.27	100		2.29117	1.66459	0.0290605	0.00503457		0.00687676	0.0231722	4.01991		0.683875	0.281908	0.0157491	0.981532		0.696742	0.287212	0.0160454	#4-		FELDSPAR	0.76
40	49.98	0.26	30.76	0.25	0.37	13.95	3.12	0.26	100.01		2.28804	1.65962	0.0310105	0.00969378		0.00895079	0.0252479	4.02256		0.684225	0.276929	0.0151845	0.976339		0.700807	0.28364	0.0155524	#5-		FELDSPAR	0.81
50	50.41	0.25	31	0.1	0.31	13.66	3.02	0.23	99.99		2.30032	1.66721	0.030911	0.00386507		0.00857892	0.0210858	4.03197		0.667852	0.267193	0.0133893	0.948434		0.704162	0.28172	0.0141173	#6-		FELDSPAR	0.81
60	49.76	0.2	30.93	0.27	0.52	13.9	3.26	0.26	100		2.27763	1.66854	0.0287091	0.0104677		0.00688419	0.0354782	4.02771		0.681671	0.289312	0.0151822	0.986165		0.691234	0.293371	0.0153952	#7-		FELDSPAR	0.75
70	49.52	0.26	30.87	0.26	0.37	14.37	3.03	0.31	100.01		2.27161	1.66896	0.0299229	0.0101021		0.00896905	0.0252994	4.01486		0.706264	0.26949	0.0181415	0.993895		0.710602	0.271145	0.0182529	#8-		FELDSPAR	0.78
80	50.01	0.16	31.35	0.12	0.24	14.14	2.91	0.24	100		2.28264	1.68645	0.0290102	0.00463926		0.00549189	0.0163286	4.02457		0.691494	0.257526	0.013975	0.962995		0.718066	0.267422	0.014512	#9-		FELDSPAR	0.76
90	49.72	0.25	31.35	0.27	0.3	14.01	2.97	0.23	100		2.27202	1.6884	0.0305723	0.0104504		0.00859098	0.0204343	4.03047		0.685927	0.263139	0.0134081	0.962474		0.71267	0.273399	0.0139309	#10-		FELDSPAR	0.8
100	49.77	0.23	31.11	0.1	0.29	14.45	2.87	0.3	100		2.27843	1.67851	0.0260335	0.00387752		0.00791802	0.0197889	4.01456		0.708751	0.25474	0.0175206	0.981012		0.72247	0.259671	0.0178597	#11-		FELDSPAR	0.68
110	49.95	0.17	31.42	0	0.28	14.36	2.89	0.27	99.99		2.28123	1.6912	0.0210065	0		0.00583853	0.0190611	4.01834		0.702662	0.255905	0.015731	0.974298		0.721198	0.262656	0.016146	#12-		FELDSPAR	0.55
120	49.46	0.25	31.54	0.16	0.37	14.22	2.9	0.24	100.01		2.26152	1.69966	0.0290613	0.00619657		0.00859619	0.0252176	4.03025		0.696631	0.257093	0.0139996	0.967724		0.719866	0.265668	0.0144665	#13-		FELDSPAR	0.76
130	49.62	0.27	31.37	0.18	0.28	14.38	2.71	0.26	100		2.2709	1.69205	0.026026	0.0069775		0.00929236	0.019101	4.02434		0.705112	0.240468	0.0151801	0.960761		0.73391	0.25029	0.0158	#14-		FELDSPAR	0.68
140	49.5	0.3	31.29	0.32	0.25	14.23	2.92	0.27	100		2.26692	1.68885	0.0271922	0.0124127		0.0103317	0.0170658	4.02277		0.698222	0.259275	0.0157744	0.973271		0.717397	0.266395	0.0162076	#15-		FELDSPAR	0.71
150	50.08	0.21	31.19	0.16	0.27	13.81	2.95	0.21	99.99		2.29	1.6809	0.0286806	0.00619694		0.00722123	0.0184031	4.03141		0.676586	0.261541	0.0122504	0.950377		0.711913	0.275197	0.01289	#16-		FELDSPAR	0.75
160	50.08	0.18	31.23	0.11	0.4	13.92	3.05	0.22	100.01		2.28524	1.67956	0.0282394	0.00425154		0.00617676	0.0272072	4.03067		0.680557	0.269845	0.012807	0.963209		0.706552	0.280152	0.0132962	#17-		FELDSPAR	0.74
170	49.88	0.27	31.05	0.25	0.47	13.8	3.06	0.29	100		2.28116	1.67358	0.0279195	0.00968399		0.00928566	0.0320392	4.03366		0.676184	0.271329	0.0169194	0.964433		0.701121	0.281336	0.0175434	#18-		FELDSPAR	0.73
180	50.09	0.26	30.99	0.13	0.23	13.87	3.05	0.34	100.01		2.29258	1.67167	0.0271762	0.00503968		0.00894887	0.0156913	4.02111		0.680155	0.270658	0.0198523	0.970666		0.70071	0.278837	0.0204523	#19-		FELDSPAR	0.71
190	49.95	0.32	30.85	0.16	0.4	13.91	3.33	0.21	99.99		2.28538	1.66355	0.0264015	0.00620054		0.0110102	0.0272797	4.01982		0.681881	0.295403	0.0122575	0.989541		0.689088	0.298525	0.012387	#20-		FELDSPAR	0.69
200	50.25	0.22	30.78	0.12	0.42	13.78	3.2	0.3	100.01		2.29751	1.65861	0.0271478	0.00464716		0.00756422	0.0286237	4.0241		0.675037	0.283673	0.0174985	0.976208		0.691489	0.290586	0.017925	#21-		FELDSPAR	0.71
210	50.44	0.09	31.08	0.11	0.37	13.96	3.03	0.21	99.99		2.30031	1.6705	0.0225019	0.00424903		0.00308656	0.0251518	4.0258		0.682109	0.267917	0.0122177	0.962244		0.708873	0.278429	0.0126971	#22-		FELDSPAR	0.59
220	50.13	0.22	31.08	0.08	0.33	14.06	3.01	0.26	100		2.28962	1.67303	0.0267375	0.00309487		0.00755631	0.0224665	4.02251		0.688033	0.266551	0.0151495	0.969733		0.709508	0.27487	0.0156223	#23-		FELDSPAR	0.7
230	50.1	0.16	31.01	0.16	0.4	13.85	3.15	0.22	100.01		2.289	1.66981	0.0305671	0.00619176		0.0054973	0.0272411	4.02831		0.677979	0.27904	0.012823	0.969841		0.699061	0.287717	0.0132218	#24-		FELDSPAR	0.8
240	50.33	0.2	31.05	0.18	0.3	13.67	3.16	0.23	100.01		2.29636	1.66967	0.028999	0.00695619		0.00686221	0.0204028	4.02925		0.66825	0.279542	0.0133875	0.96118		0.69524	0.290832	0.0139282	#25-		FELDSPAR	0.76
250	50.15	0.22	31.03	0.12	0.26	13.8	3.21	0.27	99.99		2.29224	1.67158	0.0282863	0.00464575		0.00756193	0.0177141	4.02202		0.675812	0.284473	0.0157439	0.976028		0.69241	0.29146	0.0161305	#26-		FELDSPAR	0.74
260	50.42	0.27	30.78	0.17	0.34	13.82	3.16	0.23	99.99		2.2996	1.65453	0.0305138	0.00656727		0.00926051	0.0231145	4.02359		0.67533	0.279437	0.0133825	0.96815		0.697547	0.28863	0.0138227	#27-		FELDSPAR	0.8
270	50.66	0.12	30.84	0.11	0.19	13.86	3.09	0.23	99.99		2.31173	1.6586	0.0267132	0.00425159		0.00411789	0.0129236	4.01834		0.677631	0.273387	0.0133893	0.964408		0.70264	0.283477	0.0138835	#28-		FELDSPAR	0.7
280	50.6	0.22	30.88	0.06	0.31	13.74	3.25	0.27	99.99		2.30612	1.65869	0.0251554	0.00231616		0.00754007	0.0210596	4.02088		0.670929	0.287185	0.0156984	0.973813		0.688971	0.294908	0.0161205	#29-		FELDSPAR	0.66
290	50.48	0.26	30.98	0.15	0.35	13.63	3.18	0.2	100		2.30127	1.66451	0.0255434	0.00579195		0.00891338	0.0237833	4.02981		0.665735	0.281075	0.0116315	0.958442		0.694602	0.293262	0.0121359	#30-		FELDSPAR	0.67
300	50.18	0.2	31.38	0.1	0.23	13.53	3.14	0.22	100.01		2.29031	1.688	0.0301541	0.00386589		0.00686459	0.0156476	4.03484		0.661636	0.277869	0.0128099	0.952315		0.694766	0.291783	0.0134513	#31-		FELDSPAR	0.79
310	50.43	0.18	30.77	0.16	0.29	13.78	3.07	0.27	100.01		2.30433	1.65706	0.0305704	0.00619243		0.00618513	0.0197519	4.02409		0.674625	0.271982	0.015739	0.962346		0.701021	0.282624	0.0163548	#32-		FELDSPAR	0.8
320	50.17	0.23	30.74	0.1	0.44	13.74	3.22	0.26	100.01		2.29628	1.65821	0.0294732	0.00387673		0.00791642	0.0300185	4.02577		0.67379	0.285748	0.0151814	0.974719		0.691266	0.293159	0.0155752	#33-		FELDSPAR	0.77
330	50.17	0.28	31.05	0.13	0.34	13.93	2.94	0.25	100		2.29004	1.67039	0.0305384	0.00502607		0.00961122	0.0231331	4.02874		0.681253	0.260192	0.0145579	0.956003		0.712606	0.272167	0.0152279	#34-		FELDSPAR	0.8
340	50.4	0.21	31.07	0.12	0.2	14.02	2.9	0.26	99.98		2.2993	1.67056	0.0263251	0.00463695		0.00720452	0.0136004	4.02163		0.685284	0.256513	0.015132	0.95693		0.716128	0.268059	0.0158131	#35-		FELDSPAR	0.69
350	49.94	0.3	31.13	0.21	0.32	13.93	2.95	0.3	100.01		2.28395	1.67793	0.0256253	0.00813474		0.0103176	0.0218145	4.02777		0.68257	0.261582	0.0175032	0.961655		0.709787	0.272012	0.0182012	#36-		FELDSPAR	0.67
360	48.74	0.24	31.81	0.14	0.5	14.56	2.91	0.19	100		2.2344	1.71868	0.0295204	0.00543613		0.00827385	0.0341666	4.03048		0.715146	0.258652	0.0111119	0.98491		0.726103	0.262615	0.0112821	#37-		FELDSPAR	0.77
370	50.5	0.22	30.94	0.16	0.42	13.72	3.05	0.26	100		2.30074	1.66131	0.0278134	0.00617421		0.00753736	0.0285221	4.0321		0.669711	0.269415	0.0151115	0.954238		0.701828	0.282336	0.0158362	#38-		FELDSPAR	0.73
380	50.35	0.19	30.9	0.19	0.42	13.74	3.08	0.29	100		2.29892	1.6628	0.0255832	0.00734792		0.00652378	0.0285845	4.02976		0.672155	0.272661	0.016892	0.961707		0.698918	0.283517	0.0175646	#39-		FELDSPAR	0.67
390	50.11	0.17	31.11	0.2	0.33	13.92	3.13	0.21	100		2.28724	1.67357	0.0293923	0.0077322		0.00583522	0.0224521	4.02622		0.680745	0.276999	0.0122283	0.969972		0.701819	0.285574	0.0126068	#40-		FELDSPAR	0.77
400	48.73	0.26	31.93	0.17	0.46	14.24	2.95	0.27	99.99		2.23317	1.72457	0.0329594	0.00659872		0.00896023	0.0314223	4.03767		0.699186	0.262116	0.0157851	0.977087		0.715582	0.268263	0.0161553	#41-		FELDSPAR	0.86
410	49.26	0.24	31.34	0.14	0.33	14.62	2.74	0.26	100		2.25824	1.69328	0.0325874	0.00543612		0.00827384	0.0225499	4.02037		0.718092	0.243541	0.0152057	0.976839		0.735118	0.249316	0.0155662	#42-		FELDSPAR	0.85
420	49.27	0.23	31.25	0.29	0.44	14.38	2.91	0.25	100.02		2.25754	1.68756	0.0321876	0.0112548		0.00792505	0.0300512	4.02652		0.705944	0.258519	0.0146134	0.979076		0.72103	0.264044	0.0149257	#43-		FELDSPAR	0.84
430	49.33	0.22	31.49	0.07	0.23	14.67	2.78	0.23	100.01		2.26002	1.70032	0.0295018	0.00271635		0.00757958	0.0157067	4.01584		0.720094	0.246941	0.0134427	0.980478		0.734432	0.251858	0.0137104	#44-		FELDSPAR	0.77
440	49.72	0.2	31.48	0.11	0.39	14.22	2.75	0.24	99.99		2.27166	1.69513	0.0282748	0.00425687		0.00687167	0.0265602	4.03275		0.696096	0.243608	0.0139888	0.953692		0.729895	0.255436	0.0146681	#45-		FELDSPAR	0.74
450	49.12	0.24	31.37	0.22	0.31	14.75	2.85	0.24	99.99		2.25276	1.69561	0.0279985	0.00854602		0.00827728	0.0211921	4.01438		0.724779	0.253424	0.0140419	0.992244		0.730444	0.255405	0.0141516	#46-		FELDSPAR	0.73
460	49.77	0.25	31.36	0.2	0.43	14.2	2.8	0.18	100		2.27117	1.68661	0.0309117	0.00773033		0.00857912	0.0292487	4.03425		0.69427	0.247735	0.0104788	0.952483		0.728905	0.260094	0.0110016	#47-		FELDSPAR	0.81
470	49.47	0.29	31.3	0.19	0.31	14.08	2.8	0.31	100		2.26581	1.68959	0.0383035	0.00737092		0.00998852	0.0211641	4.03224		0.690944	0.248649	0.0181135	0.957707		0.721457	0.25963	0.0189134	#48-		FELDSPAR	1
480	51.34	0.29	29.96	0.18	0.39	12.6	3.9	0.28	99.99		2.34023	1.60953	0.0350708	0.0069496		0.00994078	0.0264986	4.02822		0.615361	0.344678	0.0162824	0.976321		0.630285	0.353037	0.0166773	#49-		FELDSPAR	0.92
490	54.81	0.25	27.99	0	0.21	10.28	4.98	0.53	99.99		2.47905	1.49205	0.0272341	0		0.00850326	0.0141579	4.02099		0.498168	0.436718	0.0305815	0.965467		0.515986	0.452338	0.0316754	#50-		FELDSPAR	0.72

[truncated: 2 more sheets: GED13-Pl1, GED13_Pl2]
