# Supplementary material for: Catching the Main Ethiopian Rift Evolving Towards Plate Divergence
Source: Research Square preprint supplement (doi:10.21203/rs.3.rs-691934/v1), 2021-07-13
Supplement: Supplementary file 4 [file b709099b80765105cacf7df5.xlsx]

## Sheet: Sample location
Electronic Supplementary Material 1 - Rock sample location
Sample	Latitude	Longitude
FA 1	39.9029	8.98985
FA 3	39.8958	8.99853
FA 4	39.8954	8.99853
FA 5	39.8945	8.99833
FA 6	39.8934	8.99794
FA 7	39.893	8.99797
FA 8	39.893	8.99797
FA 2	39.9025	8.98969
FK1	39.8053	8.84946
FK10	39.798	8.89205
FK11	39.7978	8.88964
FK12	39.7885	8.88621
FK13	39.7892	8.8872
FK15	39.7647	8.86919
FK16	39.7484	8.86218
FK18	39.7324	8.84565
FK19	39.7482	8.8598
FK2	39.8423	8.87943
FK20	39.7106	8.8343
FK21	39.7117	8.83616
FK22	39.7097	8.83478
FK23	39.7097	8.83158
FK3	39.832	8.89978
FK4	39.8263	8.90135
FK5	39.827	8.90272
FK7	39.8205	8.90522
FK8	39.8211	8.90769
FK9	39.8176	8.89741
GED1	39.2042	8.25921
GED10	39.1474	8.28335
GED11	39.1489	8.28039
GED12	39.1638	8.27414
GED13	39.165	8.27044
GED14	39.165	8.27053
GED17	39.175	8.1374
GED19	39.158	8.16682
GED2	39.1849	8.25642
GED20	39.1892	8.13997
GED21	39.1892	8.13997
GED3	39.185	8.25659
GED4	39.1792	8.25604
GED5	39.1744	8.25555
GED6	39.1037	8.30778
GED7	39.1281	8.28806
GED8	39.1295	8.28953
GED9	39.1472	8.28349
KB1	39.6679	8.77315
KB2	39.6671	8.75706
KB3	39.6255	8.77325
KONE 1	39.6866	8.82842
KONE 2	39.6859	8.82833
ME1	39.8903	8.92918
ME10	39.8879	8.93145
ME11	39.8873	8.93142
ME12	39.8881	8.93294
ME13	39.888	8.93312
ME14	39.8882	8.93278
ME15	39.8877	8.93181
ME16	39.8874	8.92967
ME17	39.8833	8.92944
ME18	39.8432	8.92831
ME19	39.8429	8.92874
ME2	39.8897	8.92884
ME20	39.8428	8.92833
ME21	39.8423	8.92294
ME22	39.8424	8.9232
ME23	39.8774	8.92585
ME24	39.8773	8.92556
FA9	39.8379	8.98976
ME26	39.8914	8.93518
ME27	39.8914	8.93746
ME28	39.8912	8.9375
ME29	39.8913	8.93743
ME3	39.8894	8.92746
ME30	39.8913	8.93755
ME31	39.9012	8.95403
ME33	39.8969	8.94957
ME32	39.9007	8.95294
ME34	39.8968	8.94817
ME35	39.895	8.94649
ME36	39.8939	8.94275
ME37	39.893	8.93678
ME38	39.8924	8.9345
ME39	39.911	8.93856
ME4	39.8892	8.9252
ME40	39.9107	8.93721
ME5	39.8868	8.9209
ME6	39.8857	8.91946
ME7	39.8935	8.91228
ME8	39.8916	8.92837
ME8-bis	39.9024	8.92028
ME9	39.8882	8.92775
Fk14	39.7657	8.87912
	39.9017	8.9564
	39.9002	8.95285

## Sheet: Only MSC location
Electronic Supplementary Material 1 - Rock sample location of only Monogenetic Scoria cones
ID	Latitude	Longitue
1	39.6977	8.84355
2	39.7918	8.862
3	39.7926	8.8638
4	39.793	8.86453
5	39.7935	8.86523
6	39.7942	8.8664
7	39.7939	8.86425
8	39.7939	8.86572
9	39.7737	8.83658
10	39.8051	8.87613
11	39.7979	8.87556
12	39.8045	8.87519
13	39.8078	8.88306
14	39.8086	8.8854
15	39.7983	8.87643
16	39.7972	8.87403
17	39.7986	8.8772
18	39.7965	8.87236
19	39.7968	8.87311
20	39.796	8.87144
21	39.7967	8.88221
22	39.7968	8.88386
23	39.8131	8.91029
24	39.3064	8.49489
25	39.3104	8.50214
26	39.2953	8.48843
27	39.2961	8.49126
28	39.3066	8.48059
29	39.3083	8.4848
30	39.3125	8.42533
31	39.3876	8.42641
32	39.3889	8.43599
33	39.3672	8.44446
34	39.3551	8.43279
35	39.3575	8.43518
36	39.3588	8.43667
37	39.3428	8.43667
38	39.3467	8.44615
39	39.3481	8.447
40	39.3241	8.44285
41	39.3323	8.46586
42	39.3371	8.46348
43	39.3401	8.45332
44	39.3399	8.45583
45	39.3345	8.46065
46	39.3511	8.45751
47	39.3604	8.45863
48	39.3701	8.46993
49	39.3704	8.51036
50	39.3803	8.50911
51	39.3975	8.50964
52	39.3661	8.46995
53	39.3833	8.51494
54	39.5389	8.67056
55	39.5903	8.60322
56	39.5891	8.59968
57	39.5876	8.59767
58	39.5735	8.68212
59	39.5631	8.73495
60	39.543	8.66543
61	39.5433	8.66765
62	39.5413	8.67437
63	39.5478	8.6837
64	39.5467	8.6822
65	39.5382	8.67514
66	39.5408	8.68011
67	39.5403	8.67896
68	39.5401	8.67798
69	39.5444	8.67874
70	39.5449	8.67968
71	39.5458	8.68027
72	39.5462	8.68114
73	39.5535	8.69624
74	39.5611	8.7143
75	39.5678	8.71479
76	39.5682	8.71649
77	39.5615	8.74132
78	39.56	8.72572
79	39.5573	8.72576
80	39.5631	8.71792
81	39.5469	8.69172
82	39.5553	8.71605
83	39.5556	8.70668
84	39.7909	8.94903
85	39.8121	8.95358
86	39.7948	8.95128
87	39.7867	8.94371
88	39.7946	8.94493
89	39.7496	8.94653
90	39.8007	8.97672
91	39.8151	8.93943
92	39.782	8.92155
93	39.8417	8.92324
94	39.843	8.92844
95	39.8273	8.91716
96	39.8323	8.91116
97	39.8123	8.90716
98	39.8112	8.90421
99	39.8094	8.89981
100	39.8182	8.89739
101	39.8193	8.90443
102	39.8265	8.9013
103	39.8271	8.90238
104	39.8265	8.90679
105	39.8212	8.90817
106	39.7874	8.88572
107	39.7878	8.89055
108	39.7784	8.87346
109	39.7641	8.87923
110	39.7649	8.8805
111	39.7953	8.86946
112	39.7903	8.86783
113	39.8029	8.8507
114	39.7763	8.84518
115	39.7084	8.83647
116	39.7483	8.85478
117	39.7481	8.85826
118	39.7477	8.86313
119	39.7649	8.86982
120	39.7788	8.87447
121	39.7981	8.89234
122	39.7978	8.8894
123	39.8322	8.90038
124	39.6855	8.80666
125	39.634	8.71972
126	39.6452	8.72972
127	39.6481	8.7337
128	39.6487	8.73472
129	39.6625	8.73067
130	39.6634	8.73282
131	39.6507	8.71955
132	39.6451	8.7173
133	39.6476	8.72158
134	39.6383	8.72678
135	39.647	8.71724
136	39.6365	8.71486
137	39.6391	8.70853
138	39.6328	8.714
139	39.6319	8.71262
140	39.6341	8.7062
141	39.6438	8.71558
142	39.6376	8.70337
143	39.6349	8.70312
144	39.6402	8.6988
145	39.6371	8.69691
146	39.6366	8.69589
147	39.6362	8.69512
148	39.6357	8.69431
149	39.6305	8.69748
150	39.6314	8.69914
151	39.6349	8.69213
152	39.6291	8.69563
153	39.7764	8.89243
154	39.7779	8.89686
155	39.7787	8.89943
156	39.8423	8.87971
157	39.7324	8.84569
158	39.7404	8.85197
159	39.7427	8.8703
160	39.7438	8.79951
161	39.7374	8.78615
162	39.7392	8.78724
163	39.7403	8.78637
164	39.731	8.76607
165	39.5911	8.71077
166	39.5915	8.71166
167	39.5837	8.7041
168	39.6221	8.6925
169	39.6222	8.69153
170	39.6221	8.6906
171	39.6259	8.68487
172	39.6237	8.68268
173	39.6259	8.67962
174	39.6369	8.68111
175	39.6374	8.68215
176	39.6414	8.68056
177	39.6421	8.68131
178	39.6258	8.67799
179	39.6256	8.67656
180	39.614	8.68078
181	39.6195	8.67358
182	39.6186	8.66863
183	39.6178	8.66594
184	39.6183	8.6674
185	39.6199	8.67133
186	39.6169	8.66354
187	39.6156	8.65903
188	39.6213	8.66372
189	39.6191	8.65817
190	39.6177	8.65666
191	39.6141	8.65144
192	39.6265	8.65442
193	39.623	8.65619
194	39.6013	8.66647
195	39.601	8.66226
196	39.5956	8.66493
197	39.595	8.65713
198	39.5915	8.66545
199	39.5962	8.66735
200	39.5961	8.67559
201	39.5747	8.65435
202	39.6073	8.65262
203	39.5999	8.64282
204	39.5996	8.64141
205	39.5999	8.62642
206	39.603	8.63052
207	39.6049	8.63077
208	39.5875	8.62871
209	39.5858	8.62046
210	39.5783	8.61599
211	39.5844	8.61992
212	39.653	8.71501
213	39.6431	8.70721
214	39.207	8.40726
215	39.1799	8.35535
216	39.1519	8.36907
217	39.1554	8.25698
218	39.1533	8.23772
219	39.1957	8.29589
220	39.1866	8.31022
221	39.1879	8.31313
222	39.1905	8.31585
223	39.1734	8.25872
224	39.164	8.2511
225	39.167	8.25467
226	39.1693	8.24593
227	39.1958	8.26246
228	39.221	8.32535
229	39.1682	8.27944
230	39.1658	8.2764
231	39.1502	8.22714
232	39.1399	8.19744
233	39.1357	8.19294
234	39.1346	8.17758
235	39.1373	8.16091
236	39.1201	8.16232
237	39.1067	8.32021
238	39.7983	8.92213
239	39.7993	8.92564
240	39.8002	8.92723
241	39.797	8.90777
242	39.8014	8.908
243	39.801	8.90719
244	39.8017	8.90865
245	39.8007	8.906
246	39.8	8.90264
247	39.7995	8.90201
248	39.7994	8.90174
249	39.8007	8.90445
250	39.8003	8.90378
251	39.7992	8.90141
252	39.7978	8.90493
253	39.798	8.90565
254	39.7974	8.90381
255	39.8181	8.90066
256	39.7979	8.89747
257	39.8005	8.89858
258	39.7993	8.89577
259	39.7972	8.88633
260	39.8056	8.87959
261	39.8063	8.88075
262	39.807	8.88175
263	39.7609	8.85244
264	39.7676	8.85078
265	39.7062	8.81899
266	39.706	8.81874
267	39.705	8.81724
268	39.7125	8.84201
269	39.755	8.86691
270	39.7537	8.88253
271	39.7813	8.91653
272	39.8884	8.93435
273	39.6351	8.72781
274	39.5502	8.69767
275	39.3431	8.47004
276	39.353	8.48207
277	39.3812	8.50098
278	39.3314	8.45836
279	39.8533	8.8693
280	39.8536	8.86986
281	39.8537	8.87063
282	39.854	8.87146
283	39.8542	8.87176
284	39.8543	8.87237
285	39.8545	8.87285
286	39.8552	8.87404
287	39.8557	8.87499
288	39.8588	8.87675
289	39.8568	8.87554
290	39.8603	8.88011
291	39.8613	8.88403
292	39.8924	8.94073
293	39.8915	8.93827
294	39.8941	8.94523
295	39.8879	8.93136
296	39.6567	8.76465
297	39.6617	8.75585
298	39.6269	8.71347
299	39.6241	8.7122
300	39.6274	8.71452
301	39.7109	8.83438
